# Supplementary material for: I2-Promoted [4 + 2] cycloaddition of in situ generated azoalkenes with enaminones: facile and efficient synthesis of 1,4-dihydropyridazines and pyridazines
Source: Royal Society of Chemistry journal article supplement (doi:10.1039/d0ob01958e), 2020-01-01

Supplementary Information for

**I<sub>2</sub>-promoted [4 + 2] Cycloaddition of in Situ Generated Azoalkenes  
with Enaminones: Facile and Efficient Synthesis of 1,4-  
Dihydropyridazines and Pyridazines**

JiaJun Feng,<sup>a</sup> Tiantong He,<sup>a</sup> Yuxing Xie,<sup>b</sup> Yang Yu,<sup>c</sup> Jonathan B. Baell,<sup>a,d</sup> Fei Huang<sup>\*a,b</sup>

<sup>a</sup>School of Pharmaceutical Sciences, Nanjing Tech University, Nanjing, 211816, P. R. China

<sup>b</sup>School of Food Science and Pharmaceutical Engineering, Nanjing Normal University, Nanjing, 210023, P. R. China

<sup>c</sup>School of Environmental Science and Engineering, Nanjing Tech University, Nanjing, 211816, P. R. China

<sup>d</sup>Medicinal Chemistry Theme, Monash Institute of Pharmaceutical Sciences, Monash University, Parkville, Victoria 3052, Australia

Email: huangfei0208@yeah.net

**Table of contents**

| Contents:                                                              | page |
|------------------------------------------------------------------------|------|
| 1. General information                                                 | 2    |
| 2. General procedure for the synthesis of <i>N</i> -sulfonylhydrazones | 2    |
| 3. General procedure for the synthesis of enaminones                   | 2    |
| 4. Supplementary reference                                             | 3    |
| 5. X-Ray crystallographic studies                                      | 4    |
| 6. Copies of NMR spectra for compounds                                 | 6    |

## 1. General information

The solvents were dried and distilled prior to use by the literature methods. Analytical TLC plates, Sigma-Aldrich silica gel 60F200 were viewed by UV light (254 nm). Column chromatographic purifications were performed on SDZF silica gel 160.  $^1\text{H}$  and  $^{13}\text{C}$  NMR spectra were obtained on a Bruker NMR spectrometer at 400 MHz and 100 MHz, respectively, and referenced internally based on the residual solvent signal. The data reporting for  $^1\text{H}$  NMR spectra is as follows: chemical shift ( $\delta$ , ppm), multiplicity (s, singlet; d, doublet; t, triplet; q, quartet; m, multiplet), coupling constant in hertz, and number of protons. The data reporting for  $^{13}\text{C}$  spectra is given as chemical shift ( $\delta$ , ppm). High-resolution mass spectra (HRMS) were obtained on an Agilent mass spectrometer using electrospray ionization-time of flight (ESI-TOF). Melting points were measured with a melting point instrument without correction. All the chemical reagents were purchased from commercial sources and used as received unless otherwise indicated.

## 2. General procedure for the synthesis of *N*-sulfonylhydrazones (1)

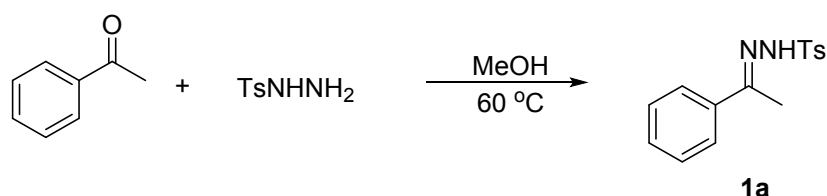

**A typical procedure for the synthesis of *N*-sulfonylhydrazones (1a-1u) –**  
**Synthesis of 1a:** A mixture of acetophenone compounds (5.0 mmol) and *p*-toluenesulfonylhydrazide (5.0 mmol) in 7.5 mL of MeOH was stirred at  $60\text{ }^\circ\text{C}$  for 0.5-3 h to afford the *N*-tosylhydrazone **1a** as a white precipitate. After that, the precipitate was washed and filtered with petroleum ether twice and dried under a vacuum to provide the pure compound **1a** (white solid, 1.37 g, 95%).<sup>1-4</sup>

## 3. General procedure for the synthesis of enaminones (2)

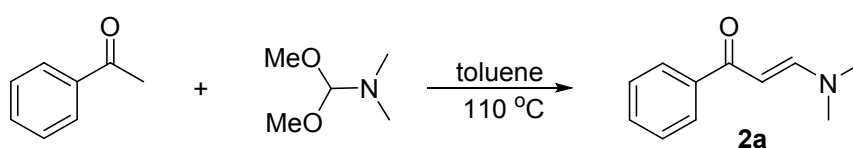

**A typical procedure for the synthesis of enaminones (2a-2m, 2o) – Synthesis of 2a:** To a stirred solution of acetophenone (5.0 mmol, 1.0 eq.) in toluene (5.0 mL), 1,1-dimethoxy-*N,N*-dimethylmethanamine (7.0 mmol, 1.4 eq.) was added and stirred at 110 °C. After completion of the reaction (monitored by TLC), it was quenched with water, extracted with ethyl acetate and dried with anhydrous Na<sub>2</sub>SO<sub>4</sub>. Then the reaction mixture was concentrated under reduced pressure and purified by silica gel column chromatography (eluent: petroleum ether (60-90 °C)/EtOAc = 1:1, v/v) to give the desired product **2a** (yellow solid, 856 mg, 98%).<sup>2,5</sup>

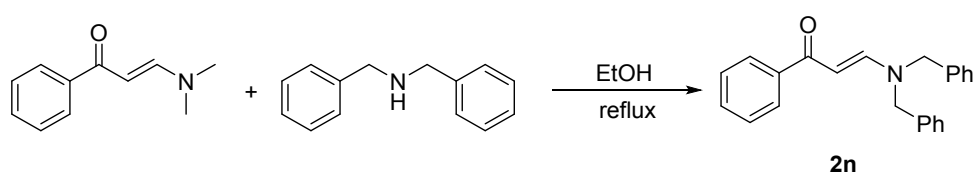

**Procedure for the synthesis of enaminones 2n:** To a stirred solution of enaminones **2a** (2 mmol, 1.0 eq.) in EtOH (5 mL), dibenzylamine (8 mmol, 4.0 eq.) was added and then heated at reflux for 12h. After completion of the reaction (monitored by TLC), the reaction mixture was cooled to room temperature and concentrated under reduced pressure to get the crude compound. The crude compound was purified by silica gel column chromatography (eluent: petroleum ether (60-90 °C)/EtOAc = 1:1, v/v) to give the desired product **2n** (yellow solid, 345 mg, 53%).<sup>6</sup>

#### 4. Supplementary Reference

- (1) S. P. Hu, S. Y. Du, Z. G. Yang, L. F. Ni and Z. K. Chen, *Adv. Synth. Catal.* 2019, **361**, 3124.
- (2) M. Y. Ni, J. G. Zhang, X. Y. Liang, Y. J. Jiang and T. P. Loh, *Chem. Commun.* 2017, **53**, 12286.
- (3) Z. Chen, Q. Yan, Z. Liu, Y. Xu and Y. Zhang, *Angew. Chem., Int. Ed.* 2013, **52**, 13324.
- (4) X. L. Yang, X. X. Peng, F. Chen and B. Han. *Org. Lett.* 2016, **18**, 2070.
- (5) C. Song, C. Yang, H. Zeng, W. Zhang, S. Guo and J. Zhu, *Org. Lett.* 2018, **20**, 3819.
- (6) Y. Gao, Y. Liu, L. Wei, and J. Wan, *Res. Chem. Intermed.* 2017, **43**, 5547.

## 5. X-Ray crystallographic studies

Single crystals for the X-ray diffraction studies for compounds **3e** was carried out on a SMART APEX diffractometer with graphite-monochromated Mo radiation ( $\lambda = 0.71073 \text{ \AA}$ ). Cell parameters were obtained by global refinement of the positions of all collected reflections. Intensities were corrected for Lorentz and polarization effects and empirical absorption. The structures were solved by direct methods and refined by full-matrix least squares on  $F^2$ . All non-hydrogen atoms were refined anisotropically. All hydrogen atoms were placed in calculated positions. Structure solution and refinement were performed by using the SHELXL-97 package. The X-ray crystallographic files, in CIF format, are available from the Cambridge Crystallographic Data Centre on quoting the deposition numbers CCDC 2014085 for **3e**. Copies of this information may be obtained free of charge from The Director, CCDC, 12 Union Road, Cambridge CB2 IEZ, UK (Fax: +44-1223-336033; e-mail: deposit@ccdc.cam.ac.uk or www: <http://www.ccdc.cam.ac.uk>).

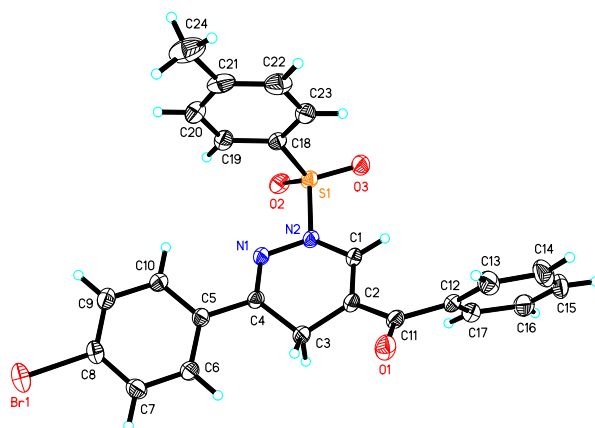

**Figure 1.** Molecular structure of compound **3e**.

**Table S1.** Crystal data and structure refinement for **3e**.

|                             |                                                          |
|-----------------------------|----------------------------------------------------------|
| Empirical formula           | $C_{24}H_{19}BrN_2O_3S$                                  |
| Formula weight              | 495.38                                                   |
| Temperature                 | 293(2) K                                                 |
| Wavelength                  | 0.71073 $\text{\AA}$                                     |
| Crystal system, space group | Triclinic, P-1                                           |
| Unit cell dimensions        | $a = 8.1722(4) \text{ \AA}$ $b = 8.9050(10) \text{ \AA}$ |

---

|                                       |                                                                    |                                 |
|---------------------------------------|--------------------------------------------------------------------|---------------------------------|
|                                       | $b = 10.5252(5) \text{ \AA}$                                       | $\square b = 79.4010(10)^\circ$ |
|                                       | $c = 13.3654(6) \text{ \AA}$                                       | $\square g = 76.2740(10)^\circ$ |
| Volume                                | 1089.82(9) $\text{\AA}^3$                                          |                                 |
| Z, Calculated density                 | 2, 1.510 $\text{Mg/m}^3$                                           |                                 |
| Absorption coefficient                | 2.011 $\text{mm}^{-1}$                                             |                                 |
| F(000)                                | 504                                                                |                                 |
| Crystal size                          | 0.170 x 0.140 x 0.120 $\text{mm}^3$                                |                                 |
| Theta range for data collection       | 2.390 to 25.999 $^\circ$                                           |                                 |
| Index ranges                          | -10 $\leq h \leq 10$ , -12 $\leq k \leq 12$ , -16 $\leq l \leq 16$ |                                 |
| Reflections collected                 | 27113                                                              |                                 |
| Independent reflections               | 4245 [R(int) = 0.0458]                                             |                                 |
| Completeness to theta = 25.242        | 99.2 %                                                             |                                 |
| Absorption correction                 | Semi-empirical from equivalents                                    |                                 |
| Max. and min. transmission            | 0.7456 and 0.4312                                                  |                                 |
| Refinement method                     | Full-matrix least-squares on $F^2$                                 |                                 |
| Data/restraints/parameters            | 4245 / 0 / 282                                                     |                                 |
| Goodness-of-fit on $F^2$              | 1.018                                                              |                                 |
| Final R indices [ $I > 2 \sigma(I)$ ] | R1 = 0.0300, wR2 = 0.0784                                          |                                 |
| R indices (all data)                  | R1 = 0.0352, wR2 = 0.0819                                          |                                 |
| Extinction coefficient                | 0.062(4)                                                           |                                 |
| Largest diff. peak and hole           | 0.241 and -0.242 $\text{e.\AA}^{-3}$                               |                                 |

---

## 6. Copies of NMR spectra for compounds

FJJ-151P

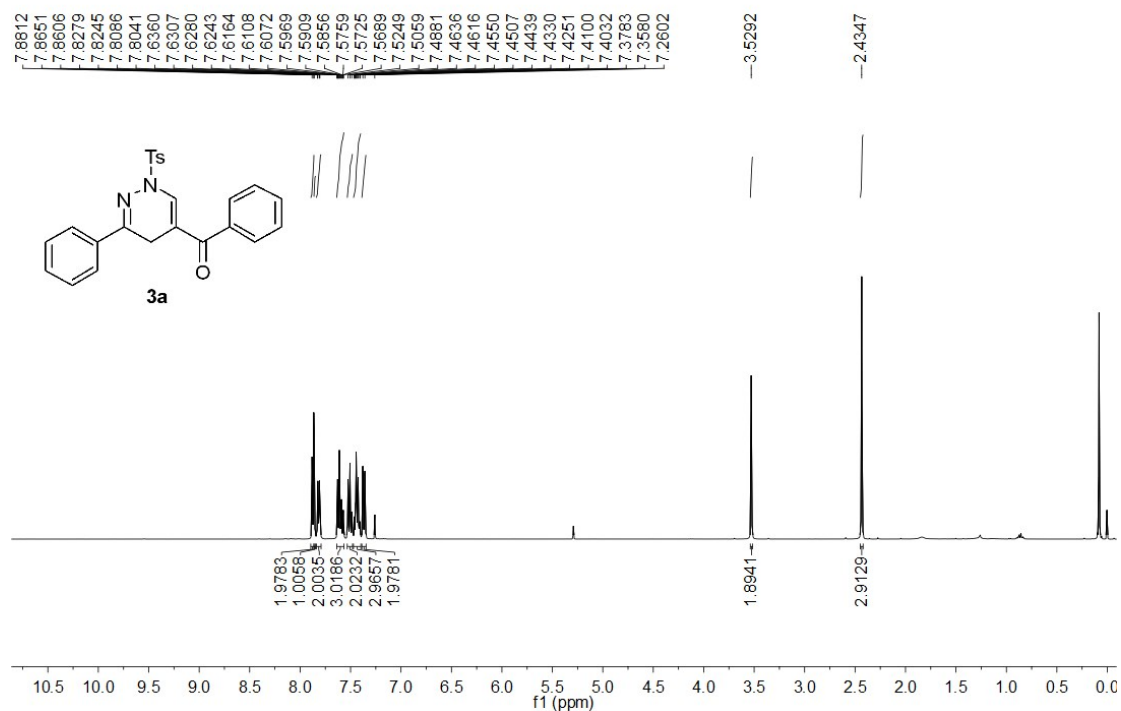

FJJ-151PC

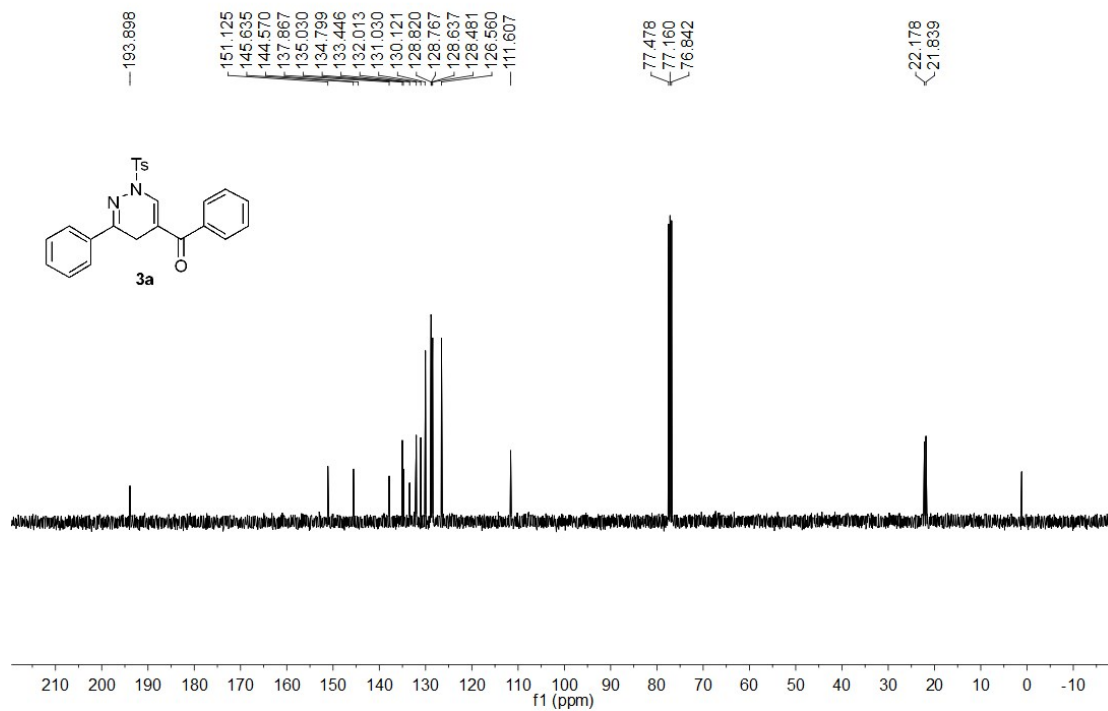

FJJ-254-H

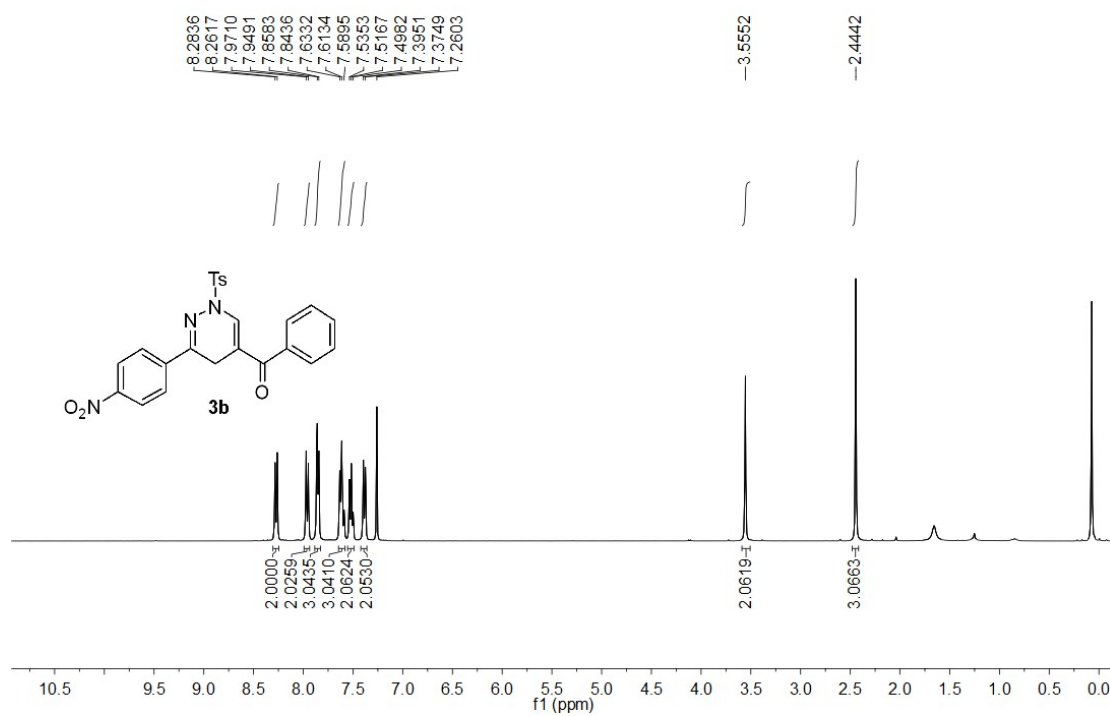

FJJ-R254

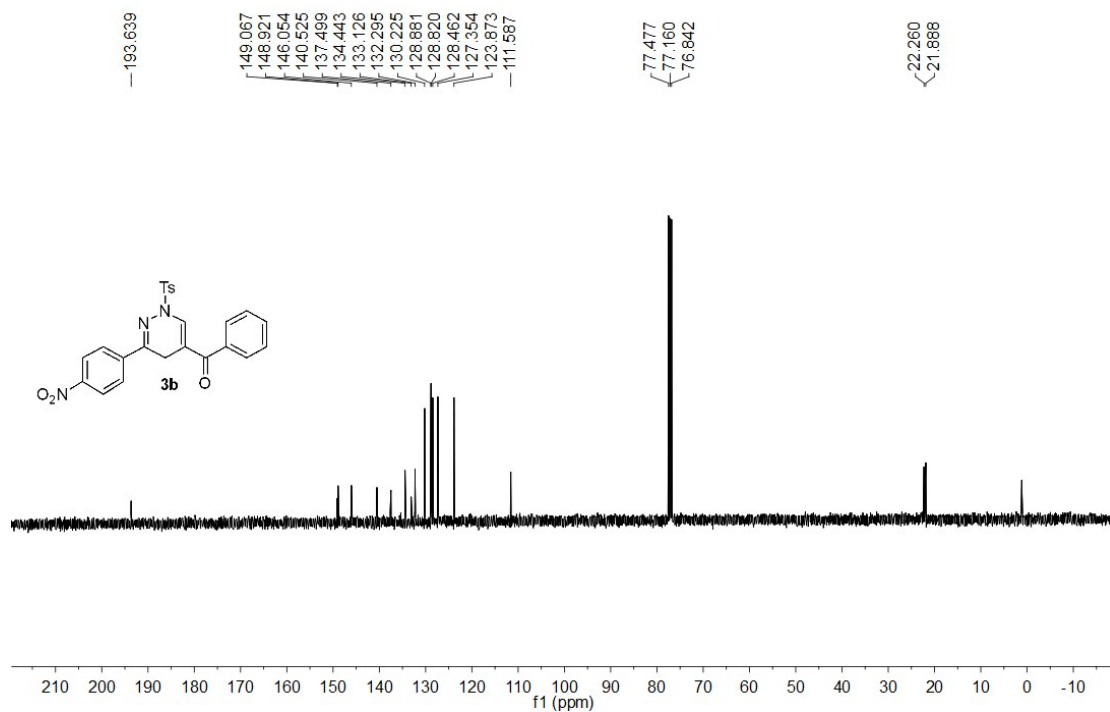

FJJ-R250

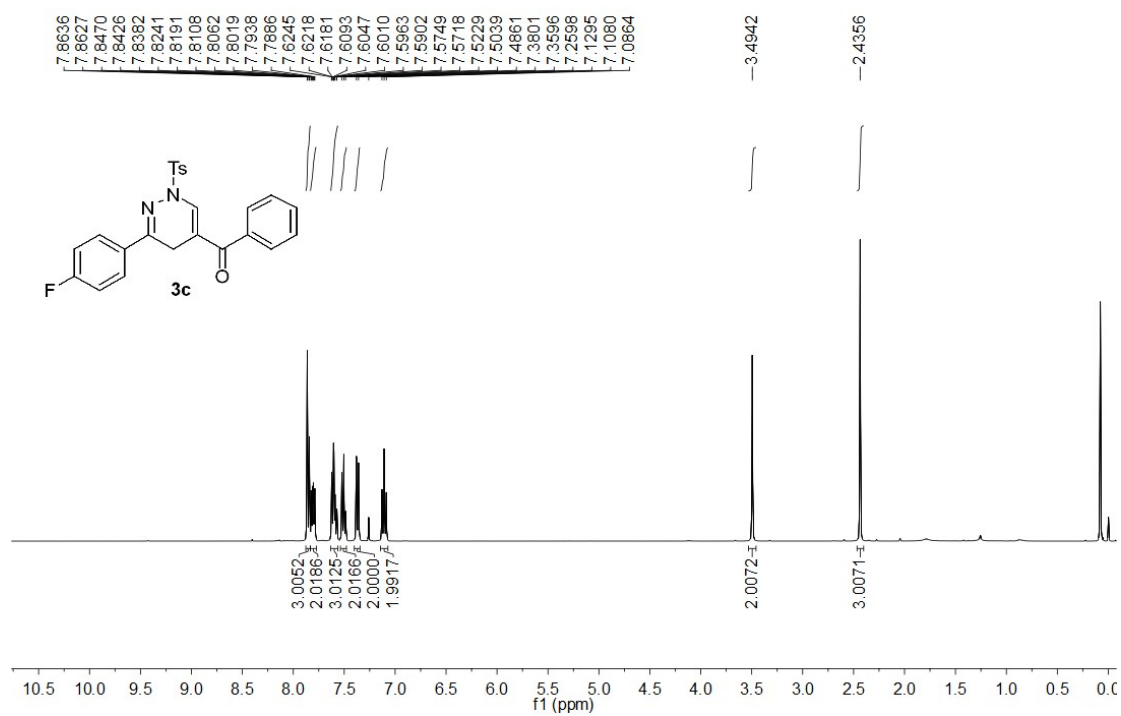

FJJ-R250

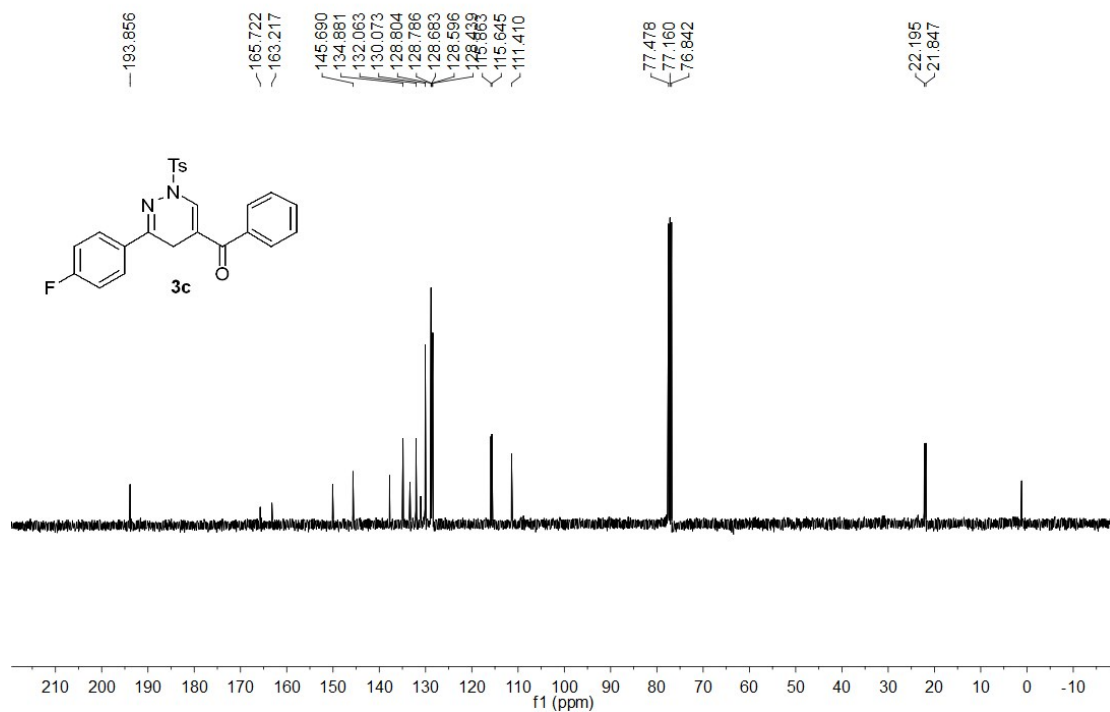



FJJ-R249

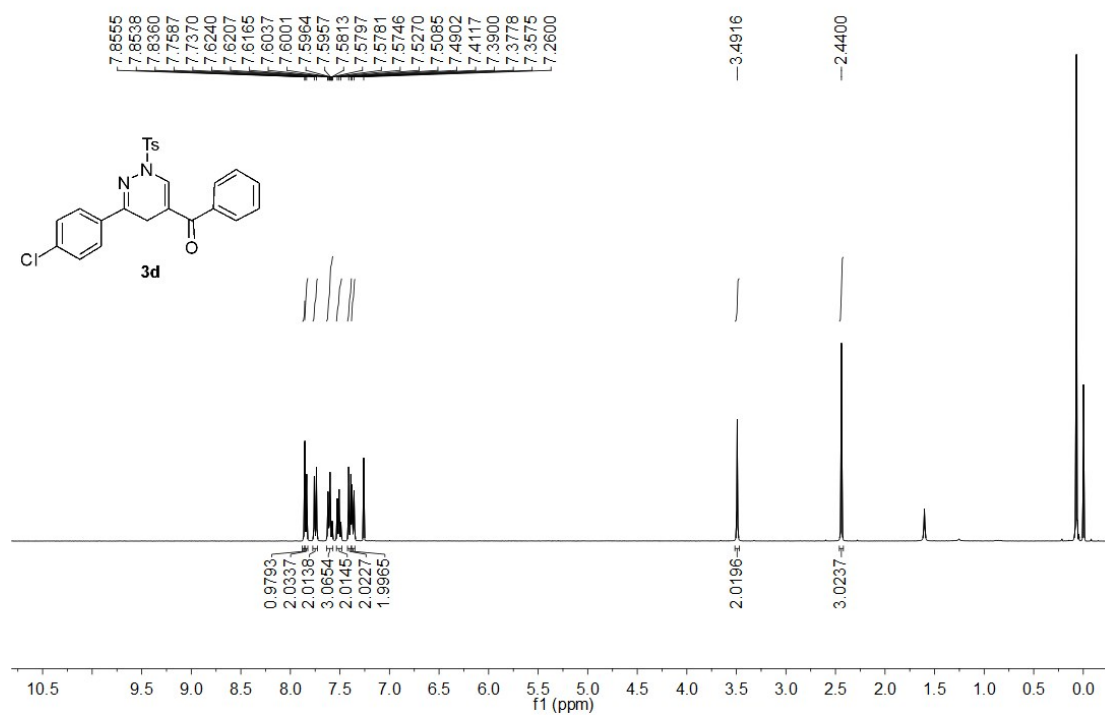

FJJ-R249-13C

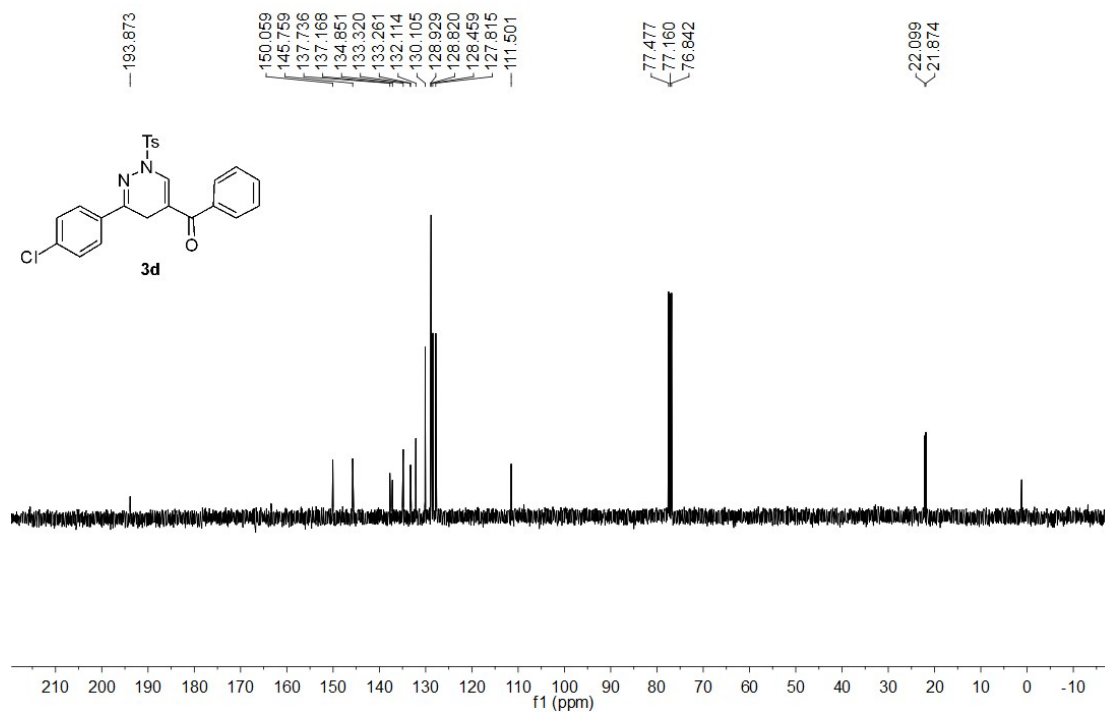

FJJ-R248

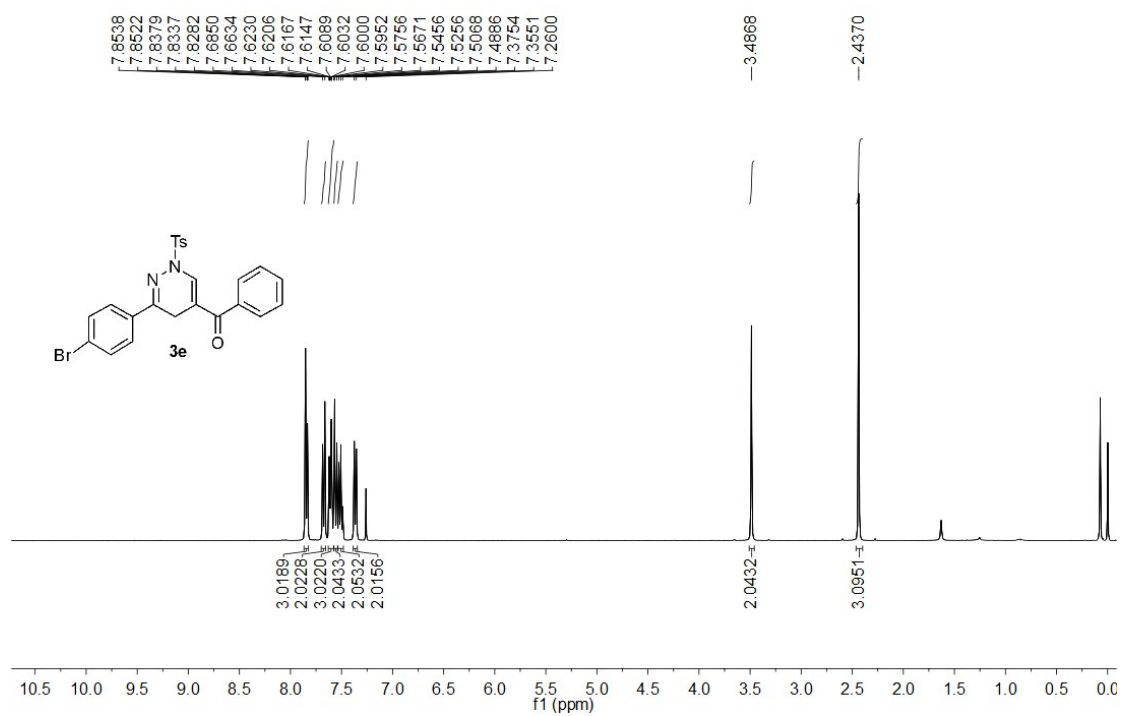

FJJ-R248

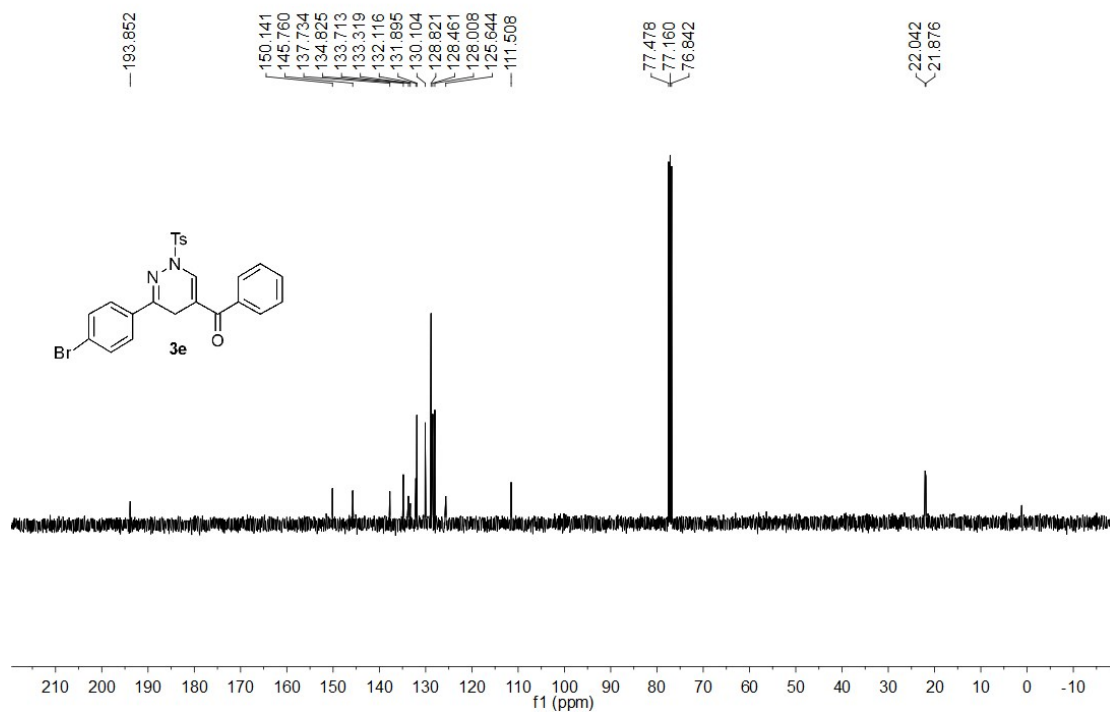

FJJ-R260  
hq-4-114

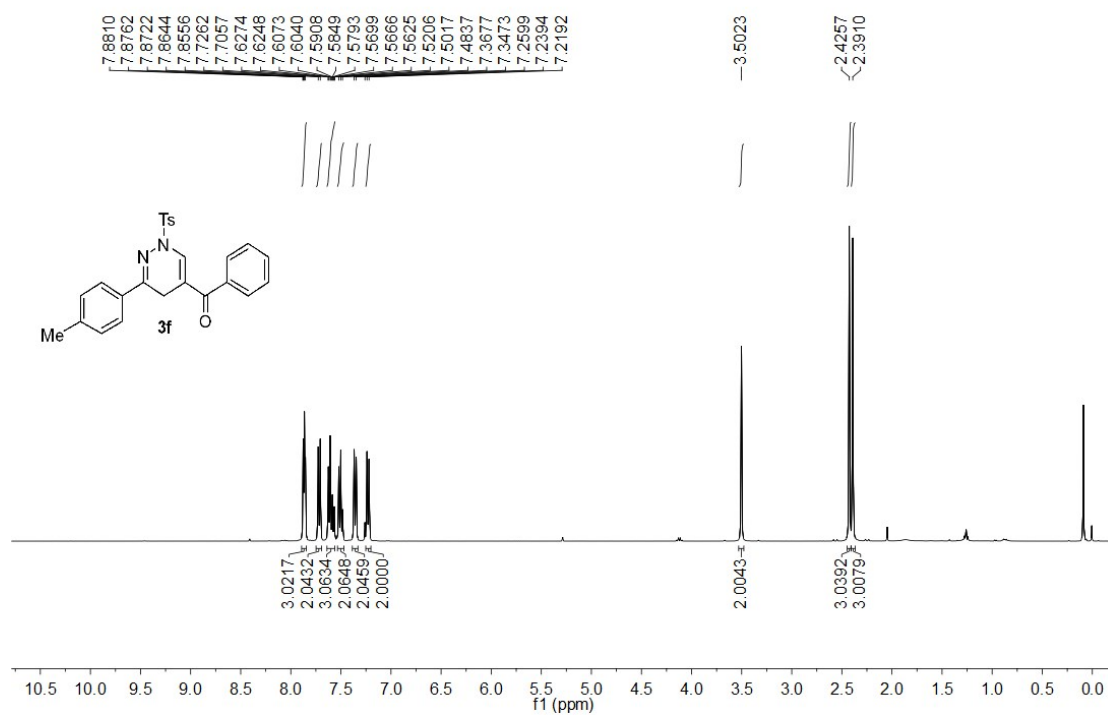

FJJ-R260-CC  
hq-4-114

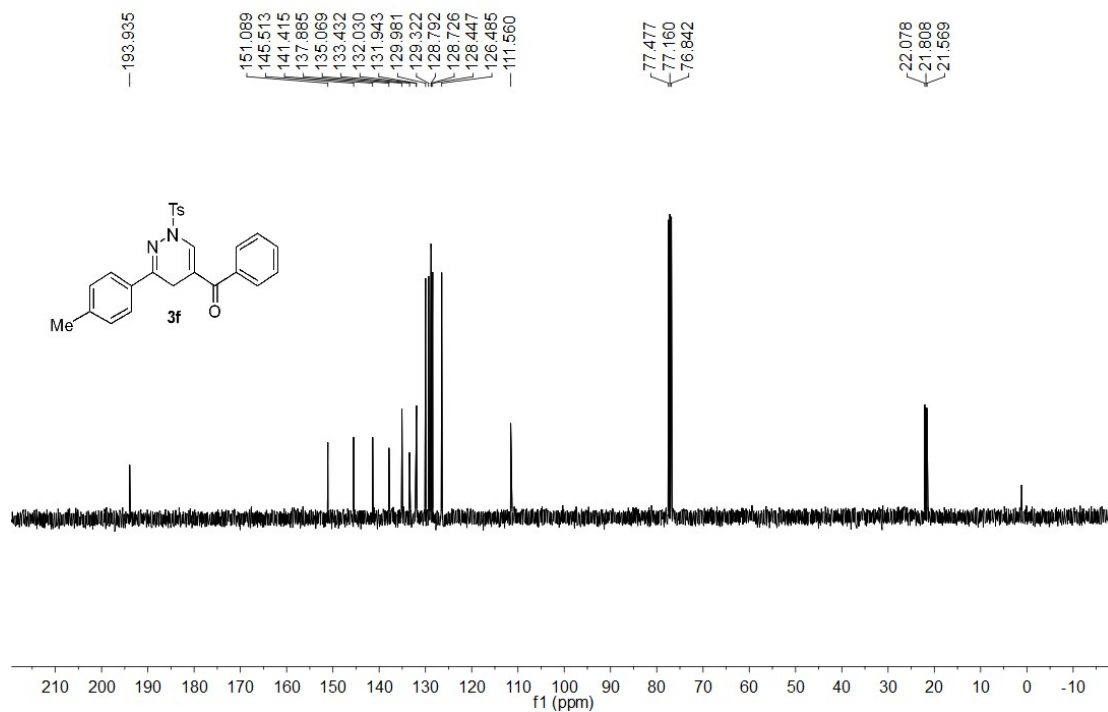

FJJ-R263

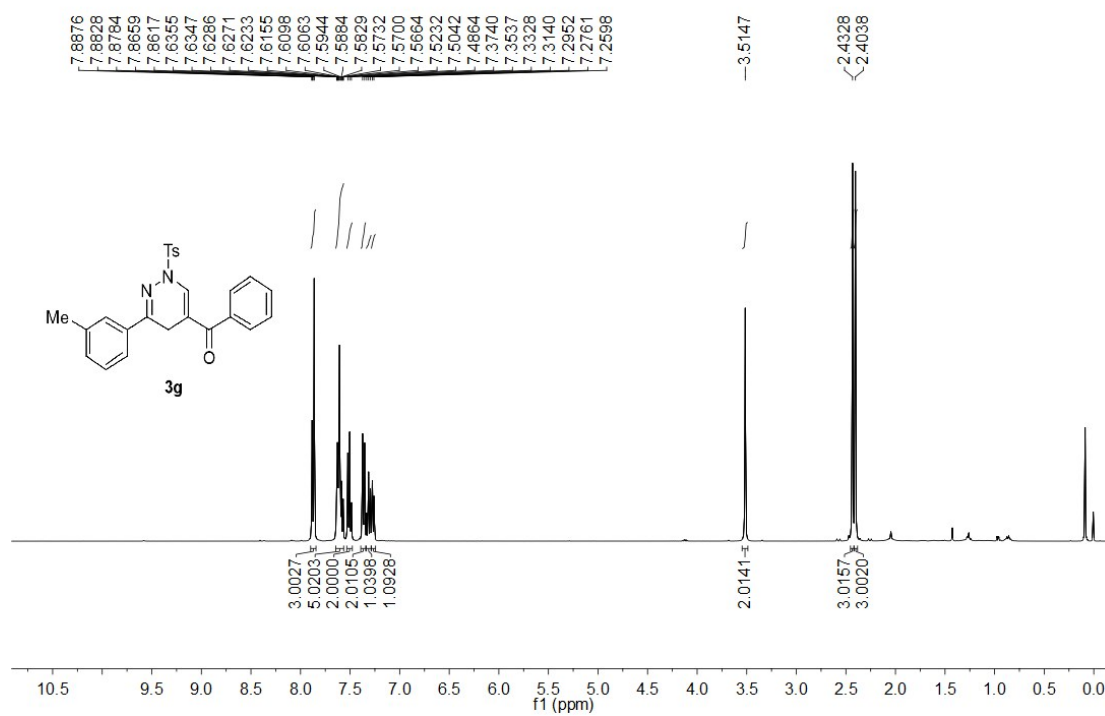

FJJ-R263

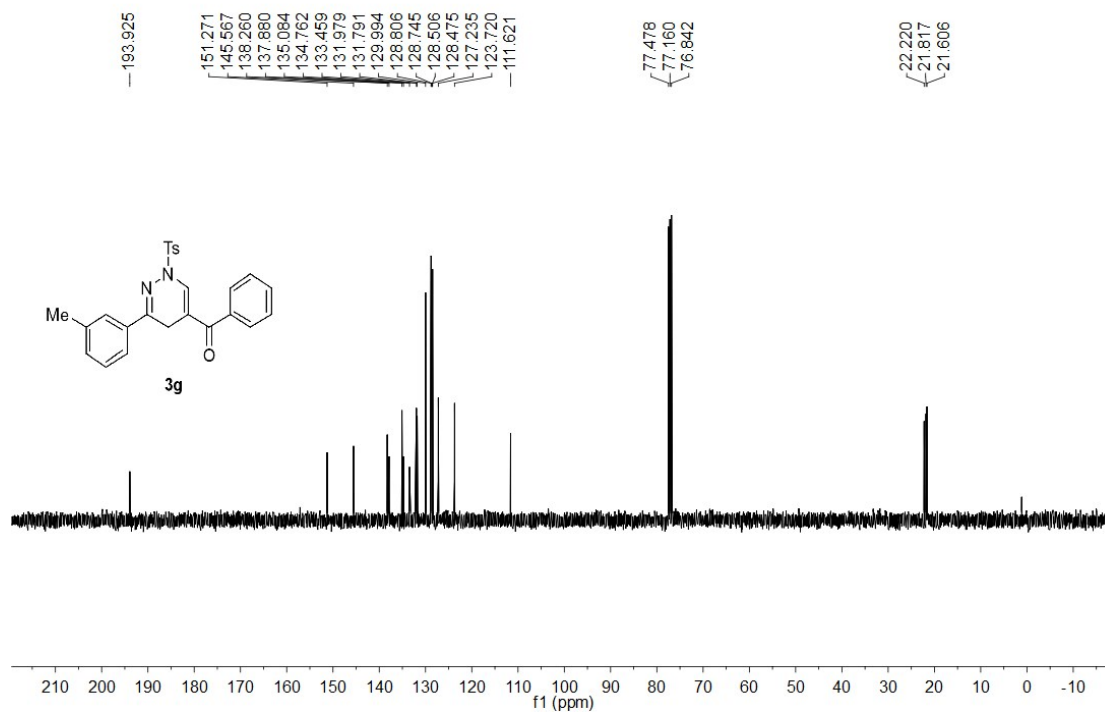

FJJ-R251

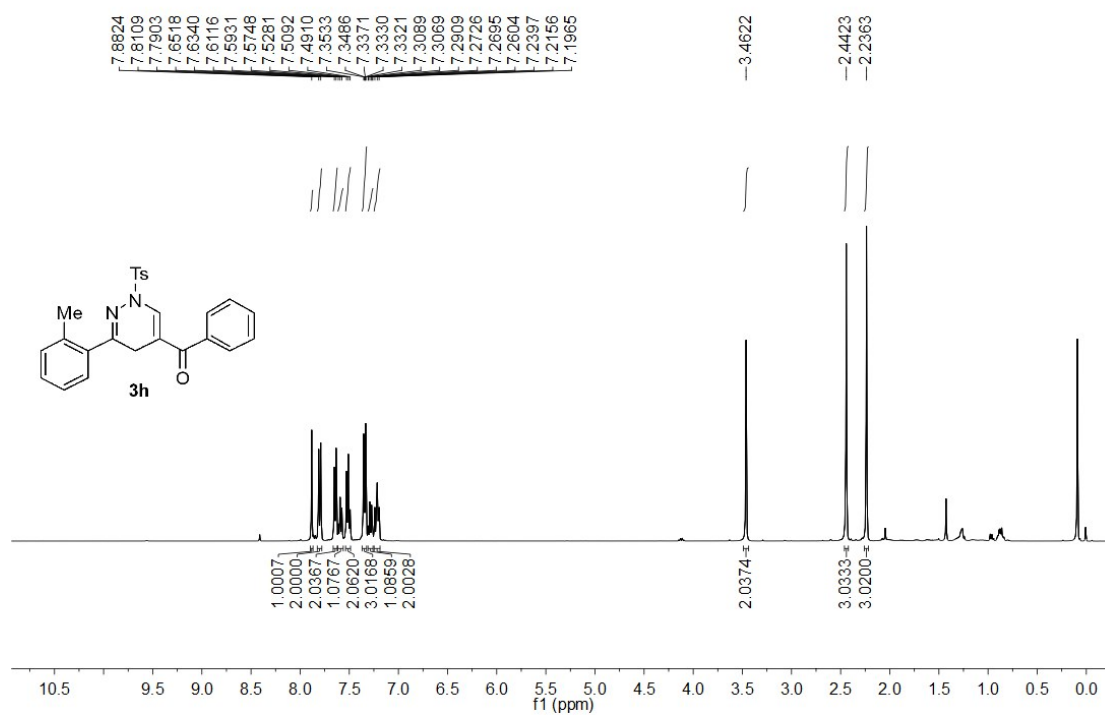

FJJ-R251

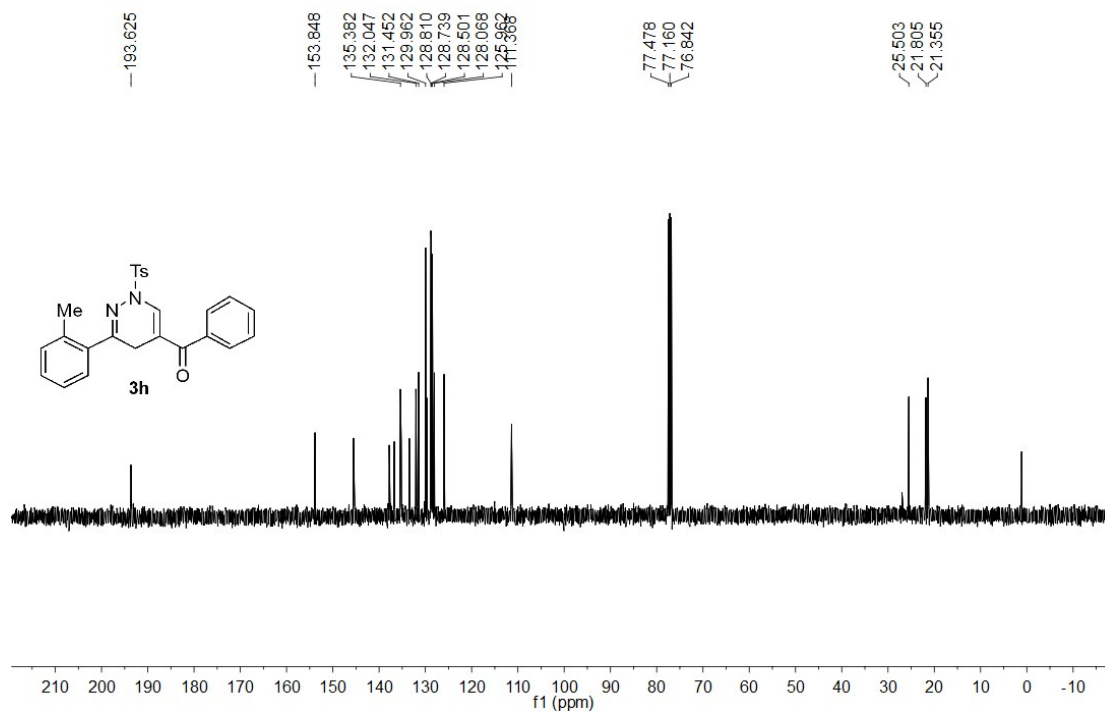

FJJ-R252

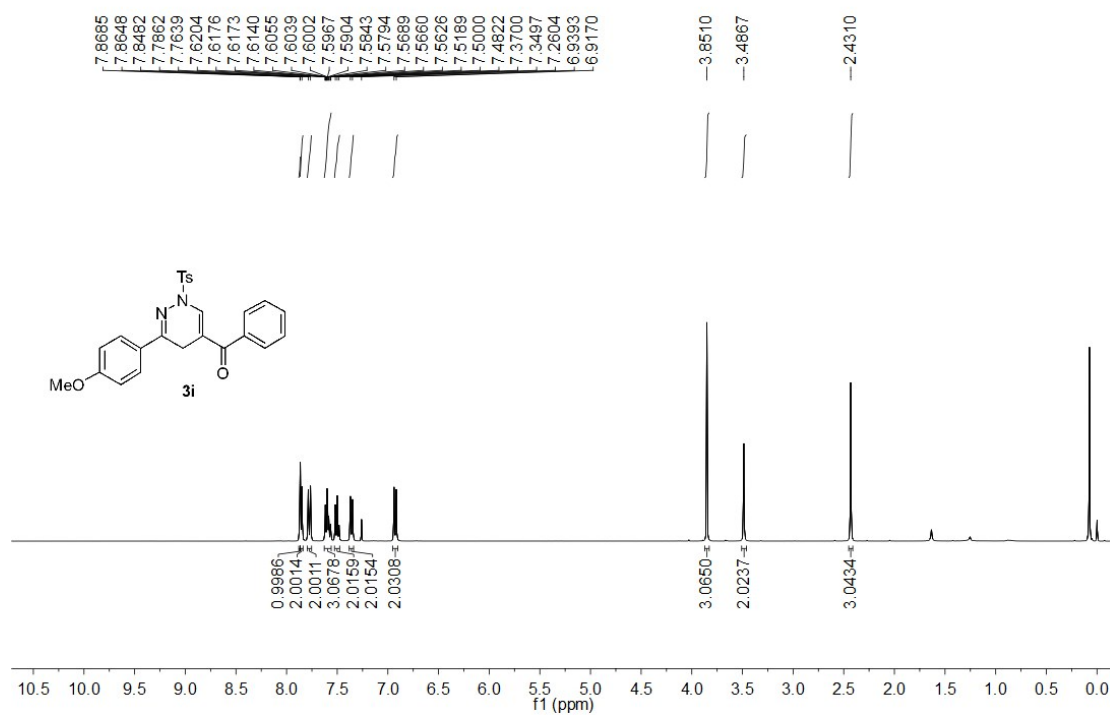

FJJ-R252-C

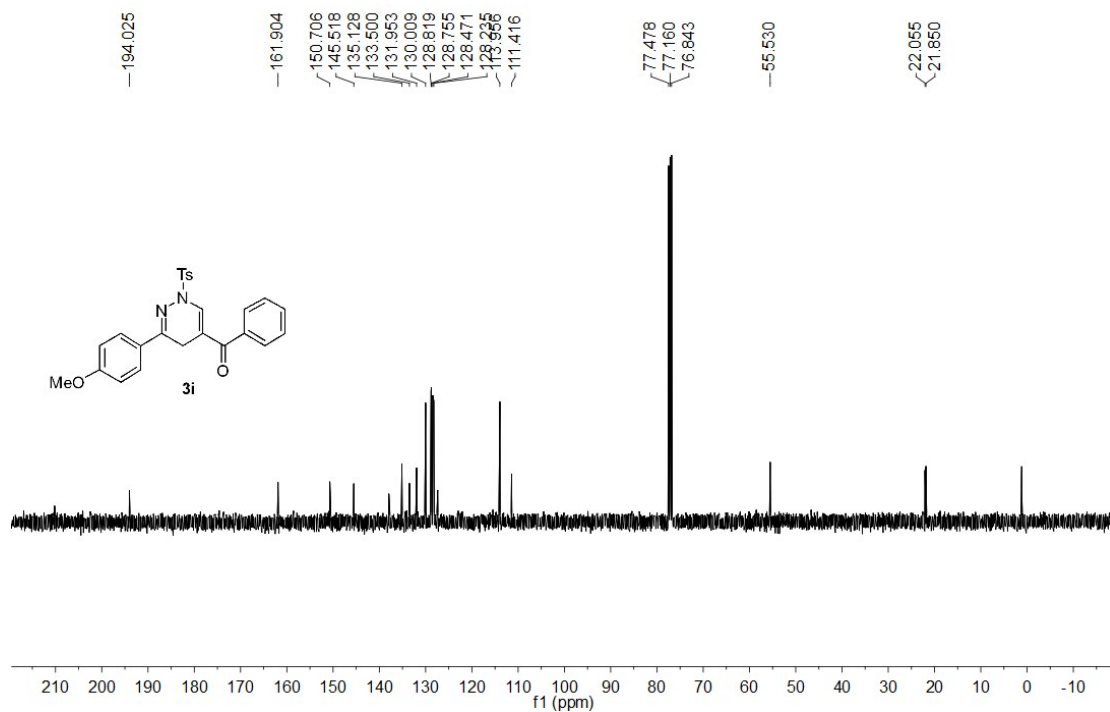

FJJ-R259  
zkd-20-1

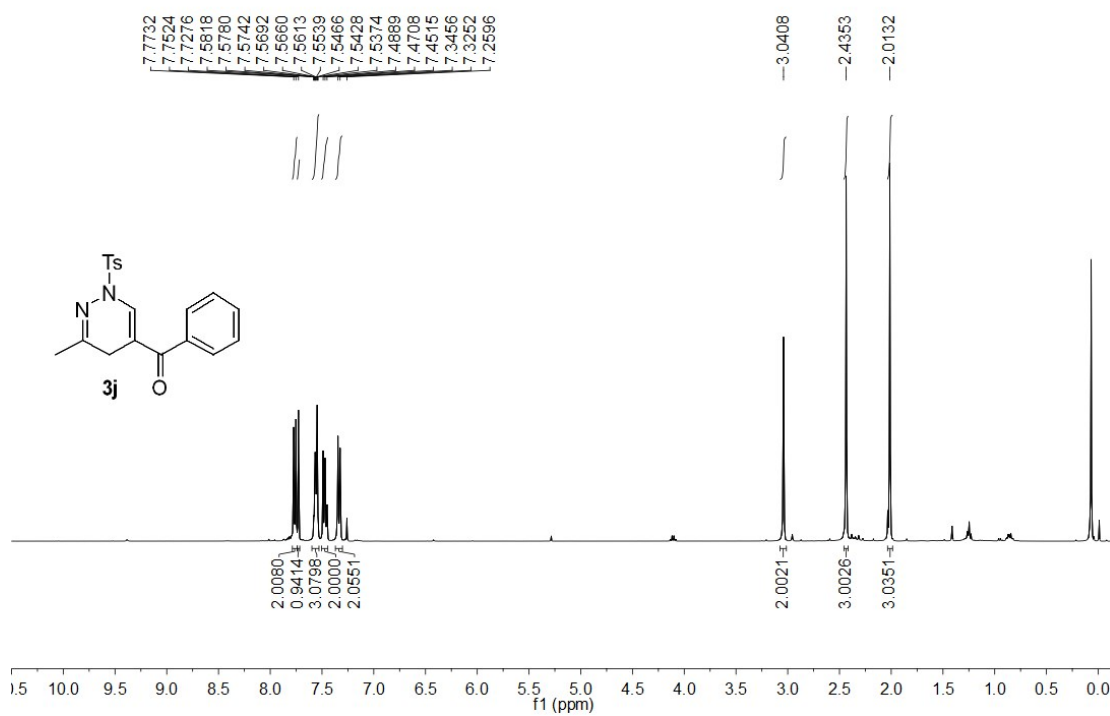

FJJ-R259  
zkd-20-1

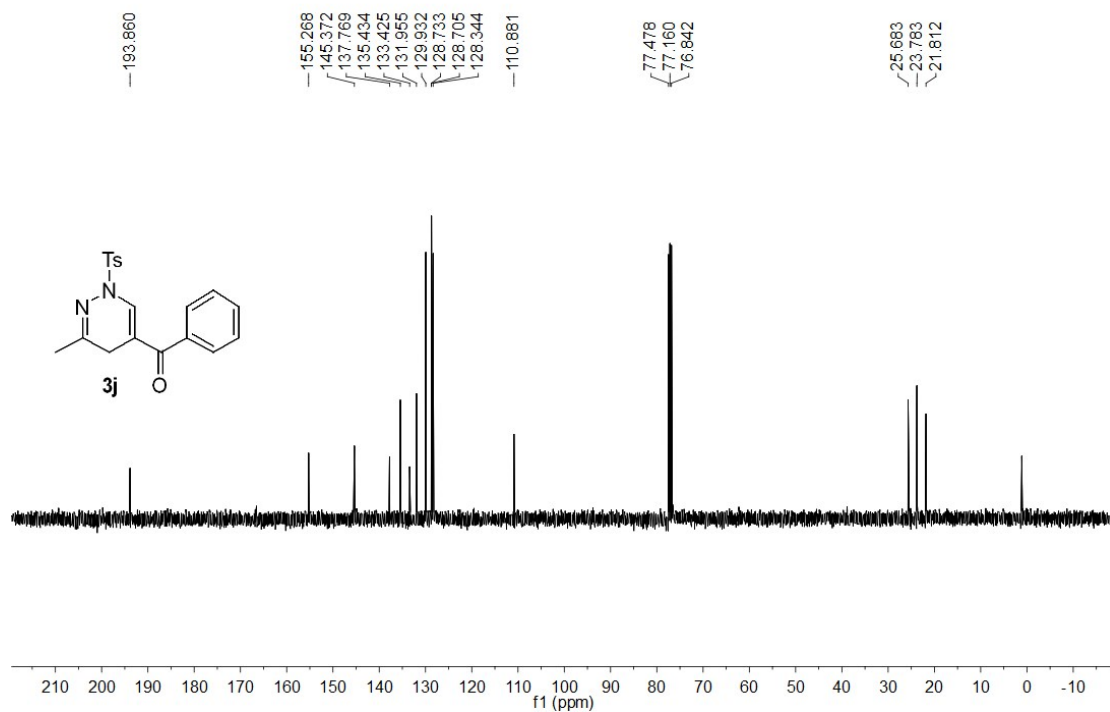

FJJ-R257-2

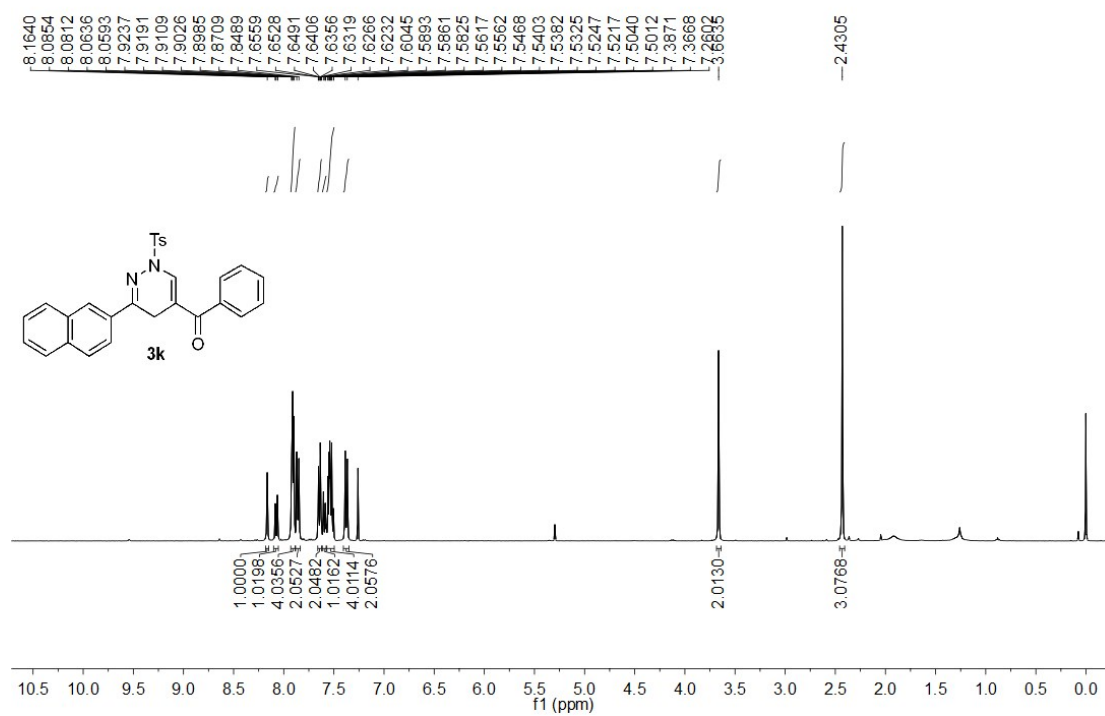

FJJ-R257-2

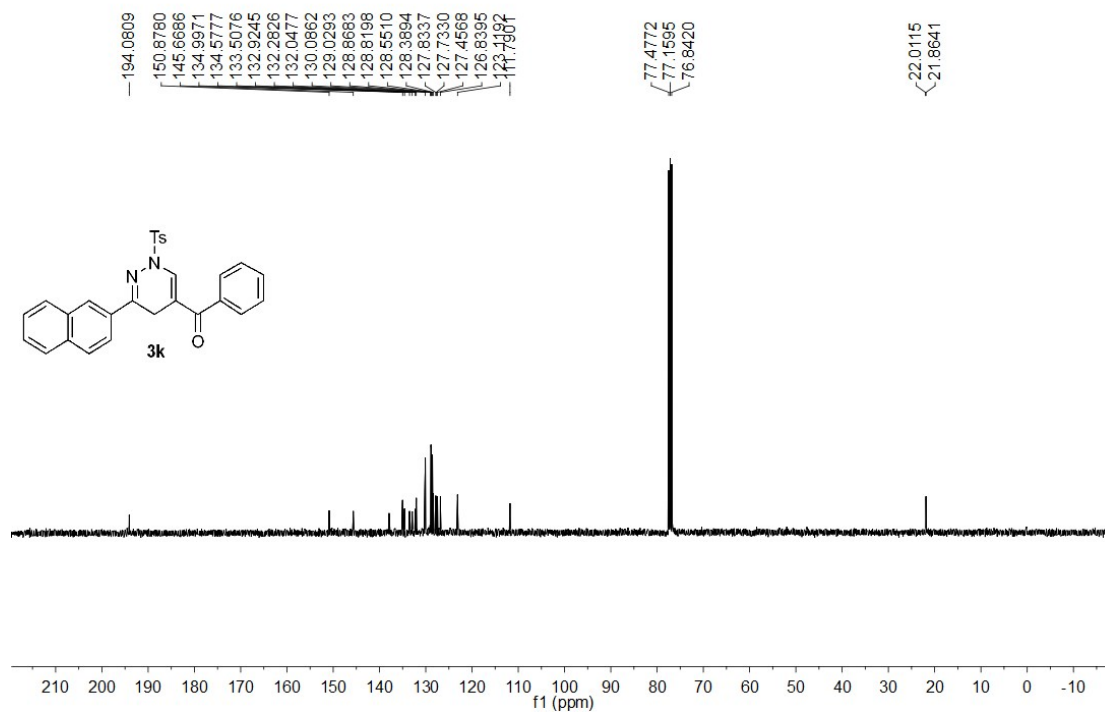



FJJ-258-H

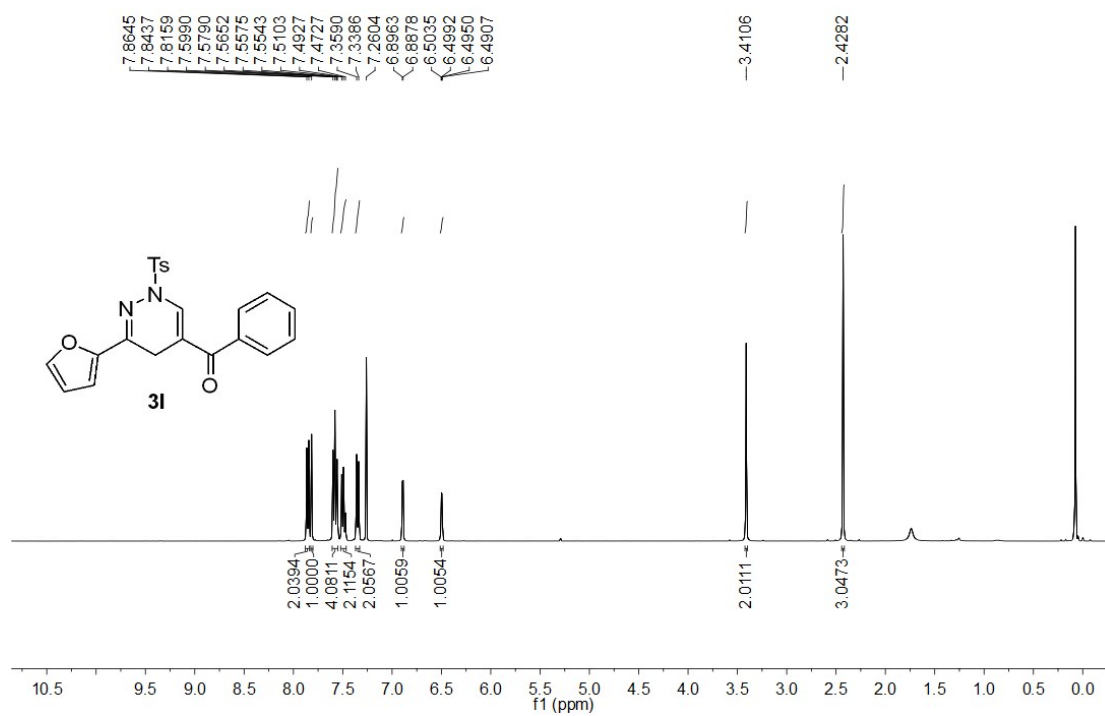

FJJ-R258

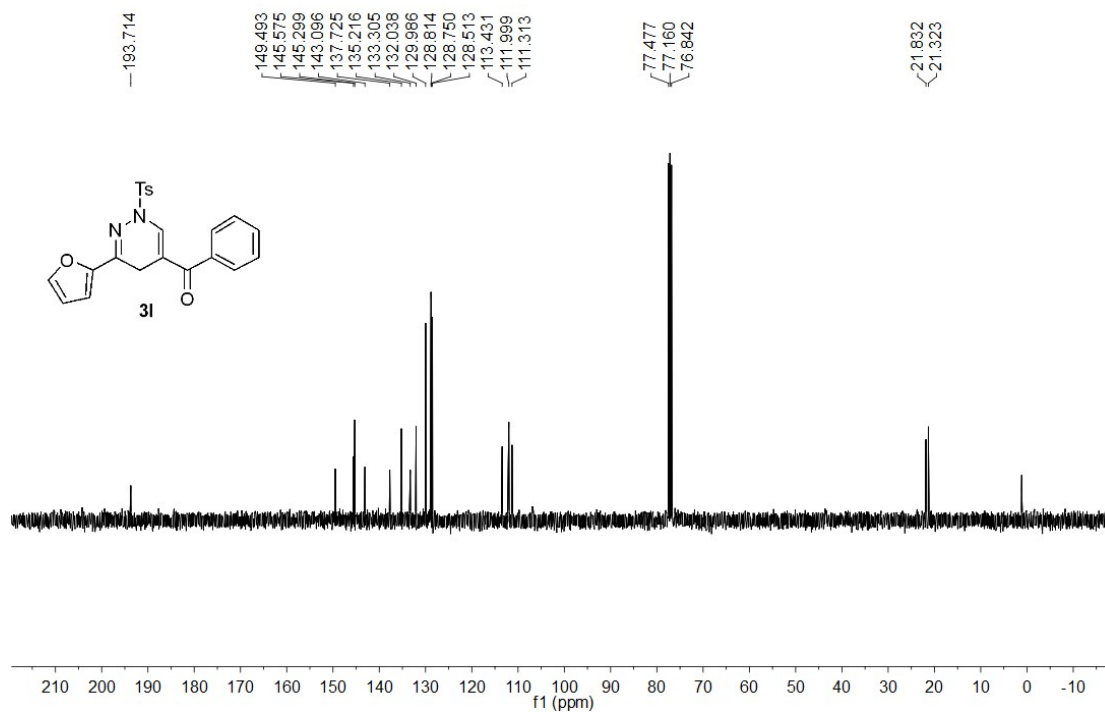

FJJ-R261-H

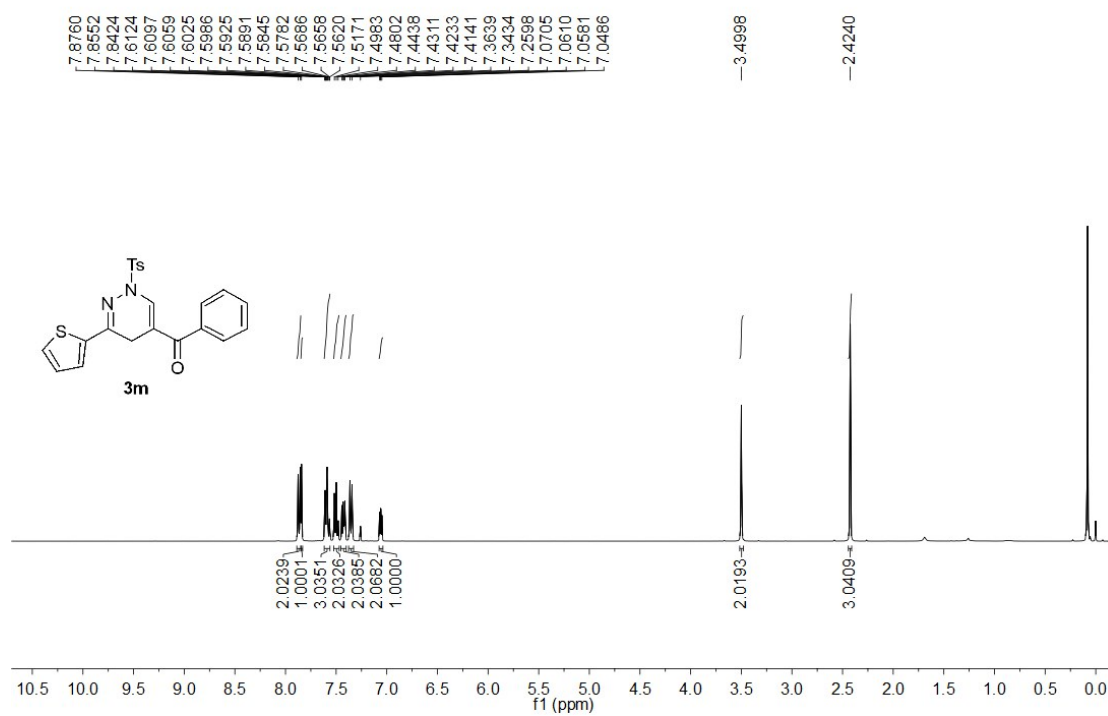

FJJ-R261-2

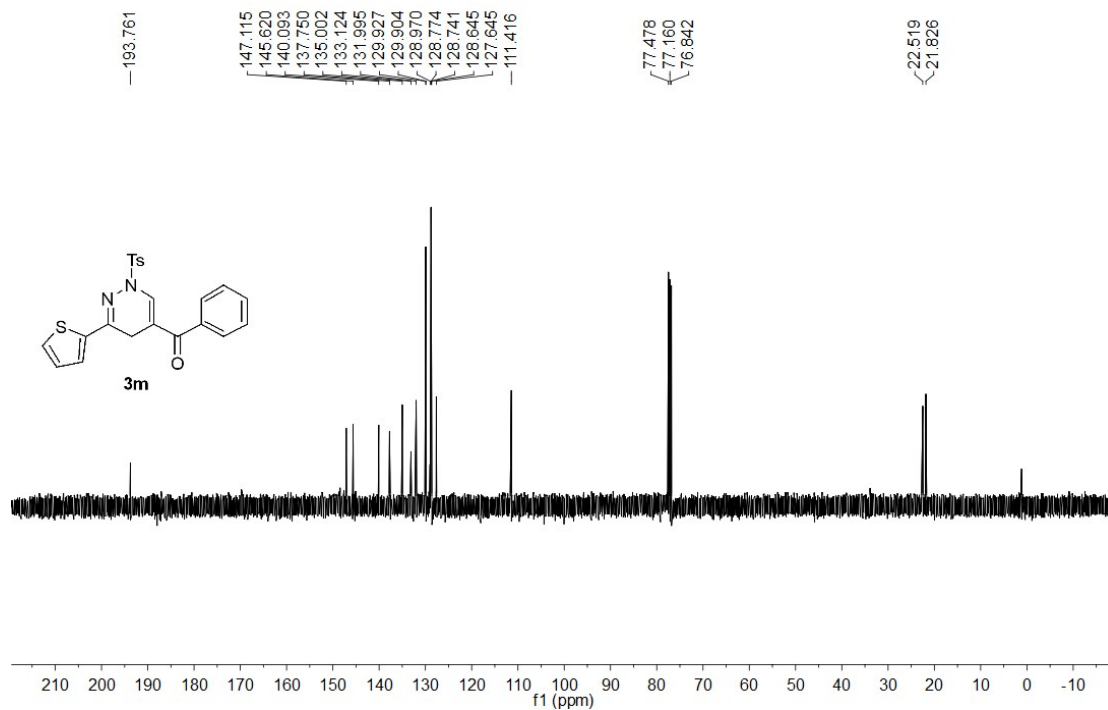

FJJ-R283

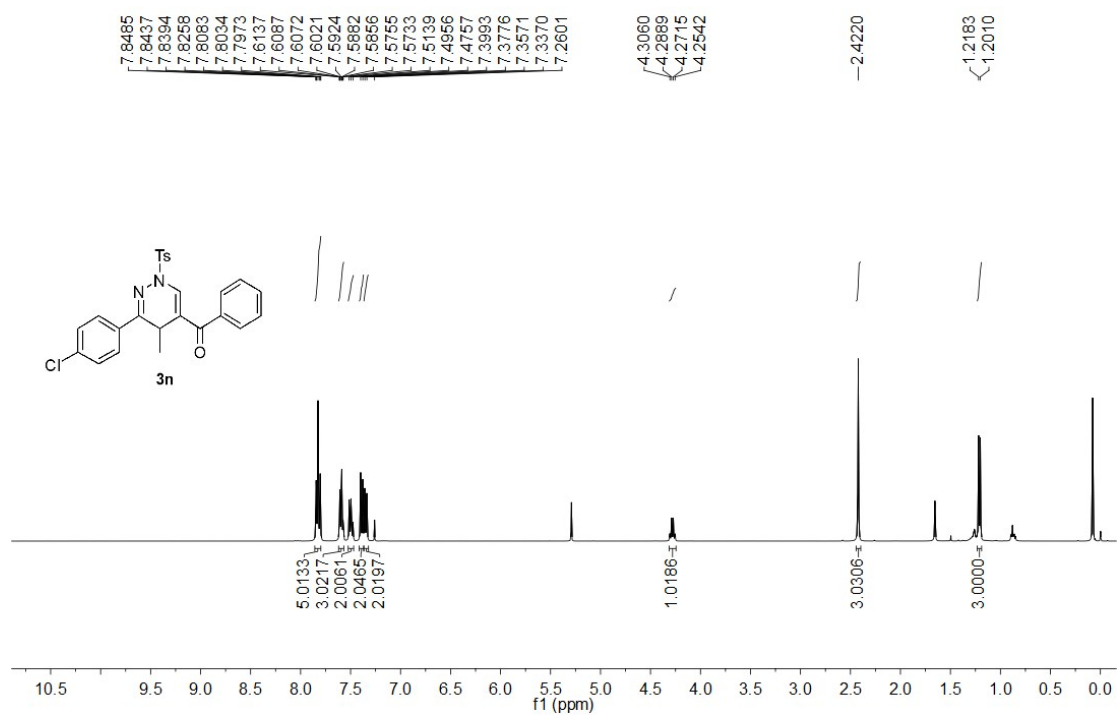

FJJ-R283

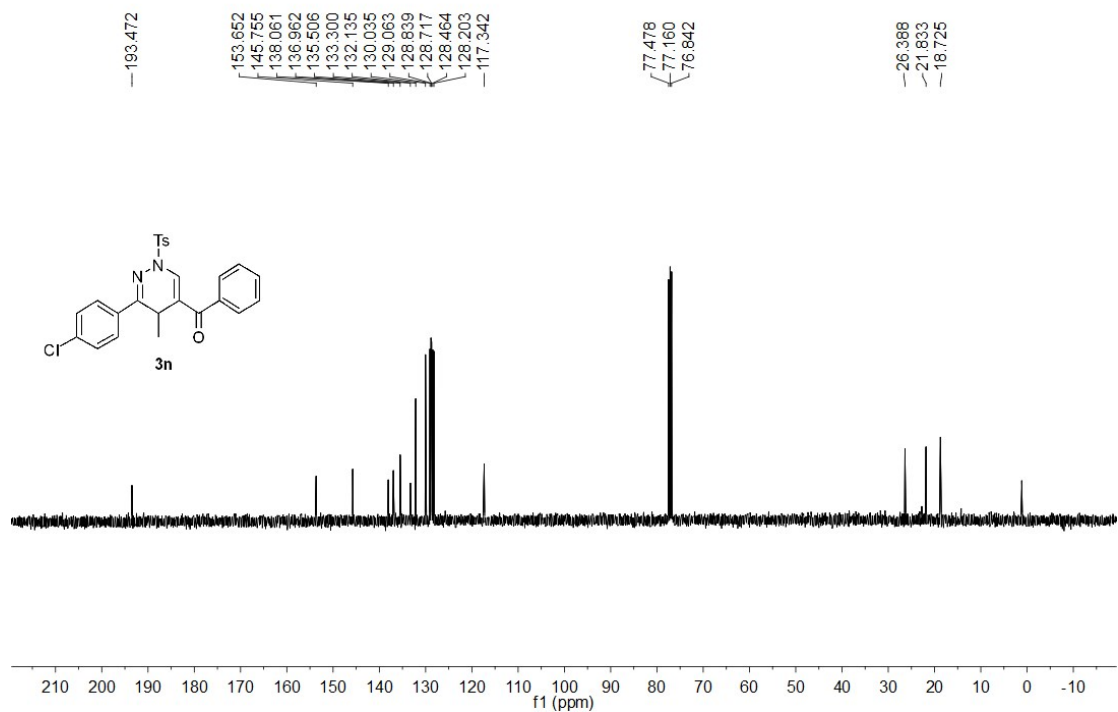

FJJ-R256

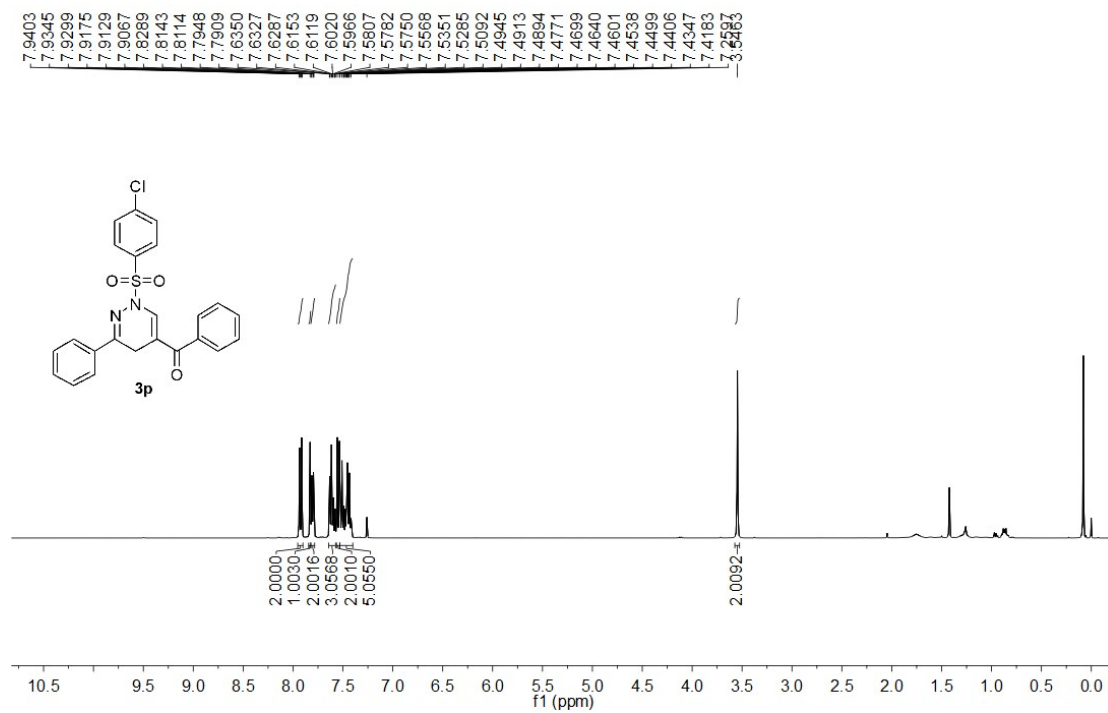

FJJ-R256

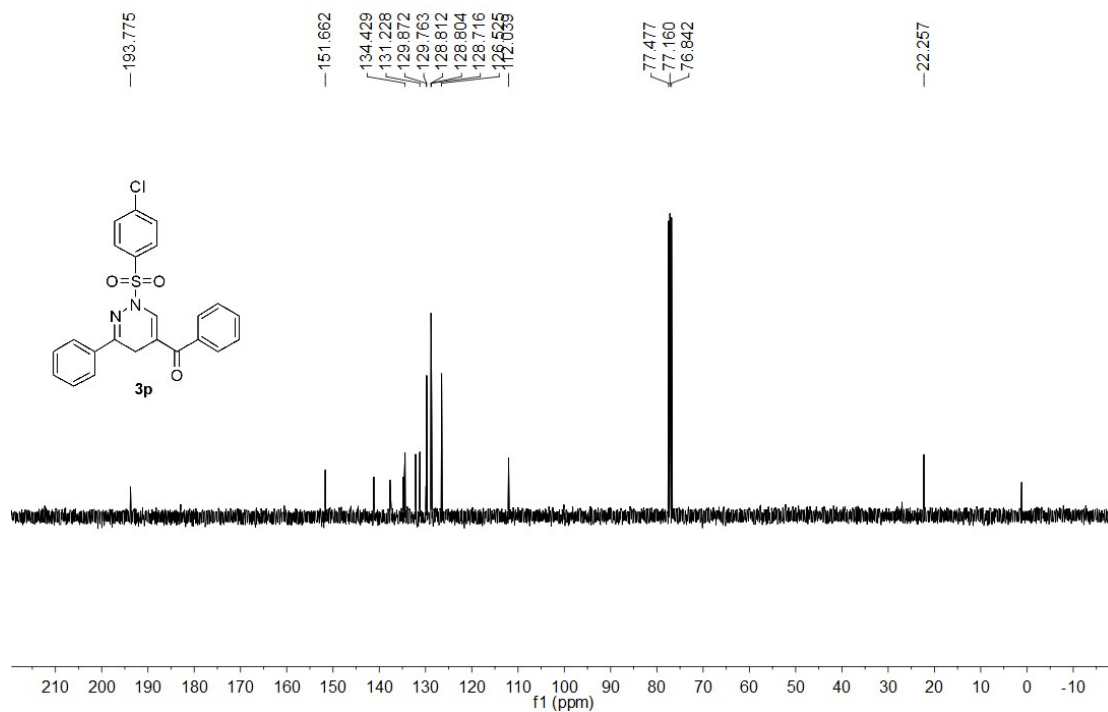

FJJ-R255

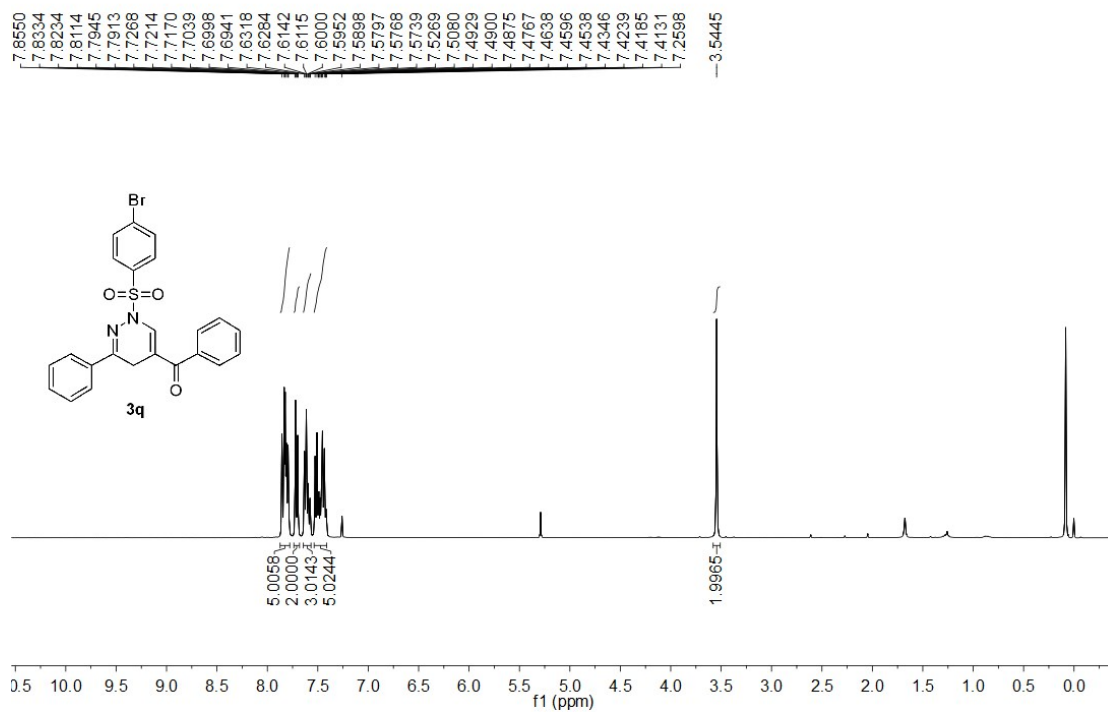

FJJ-R255

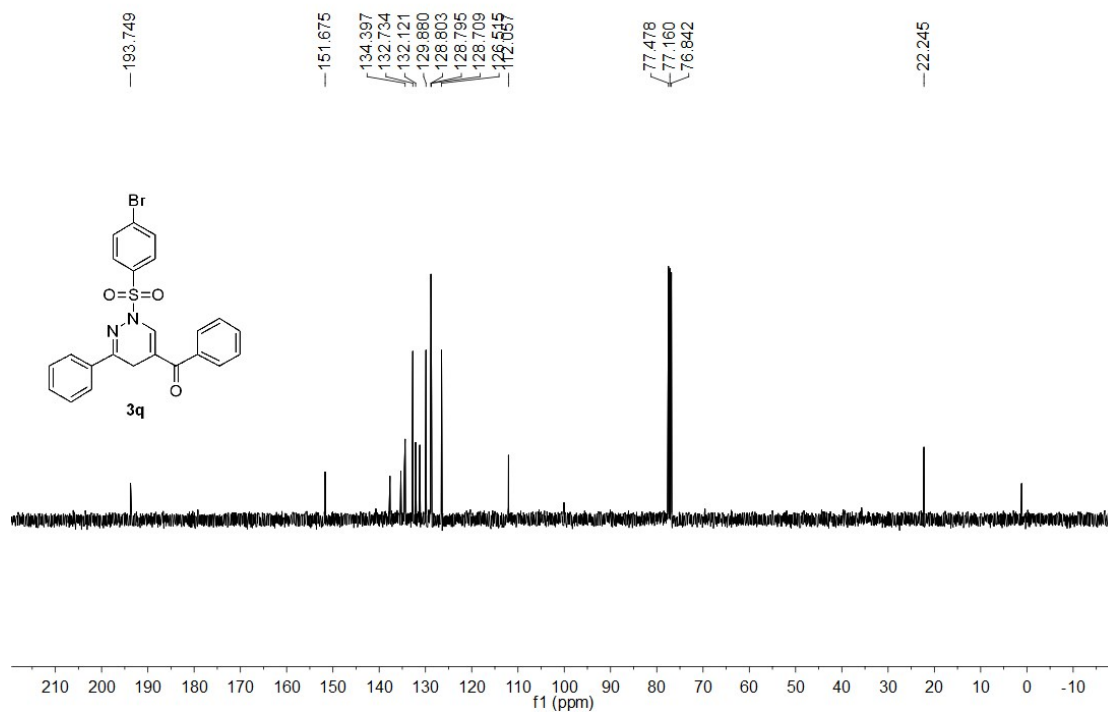

FJJ-R262

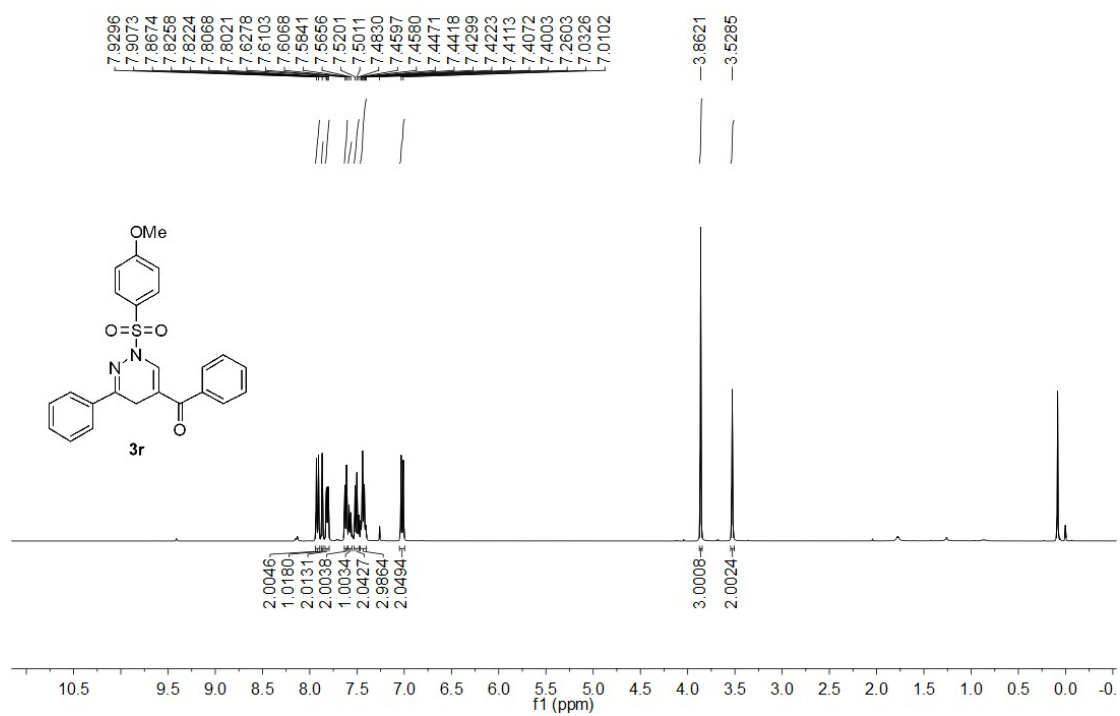

FJJ-R262

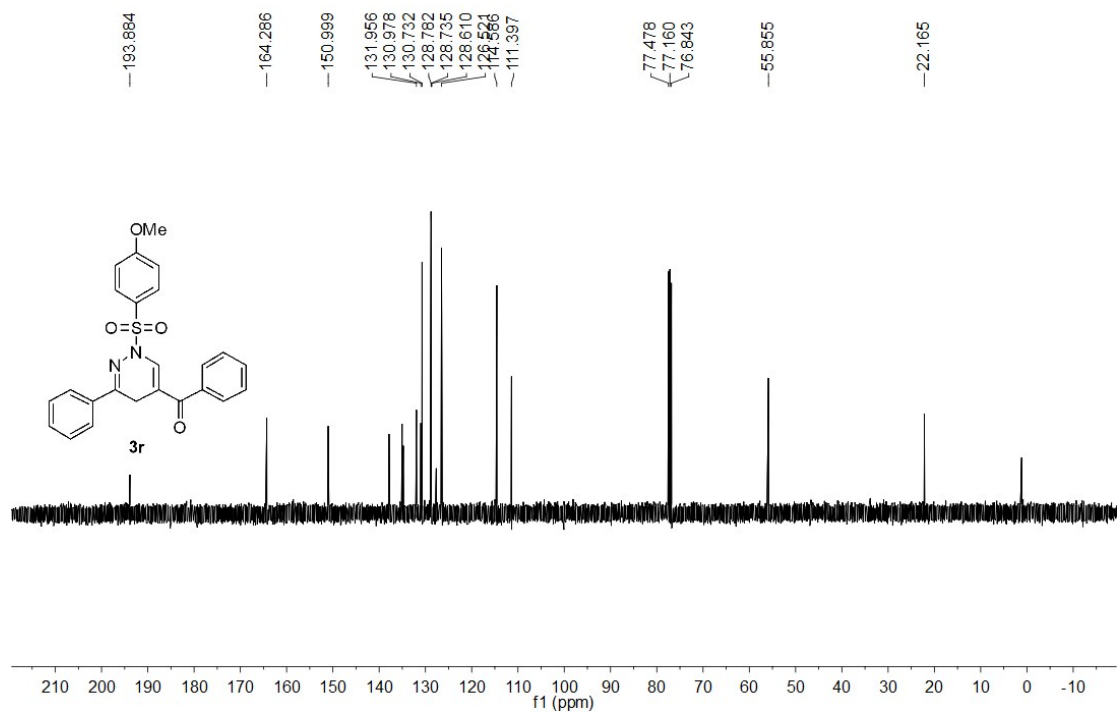

FJJ-R282

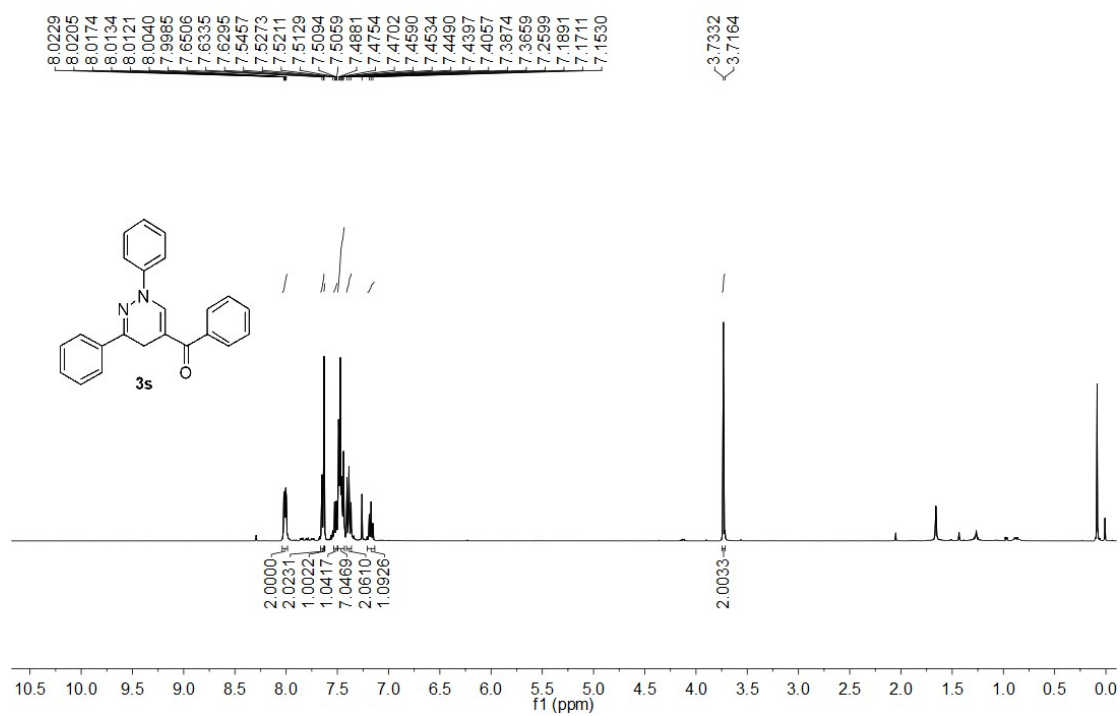

FJJ-R282

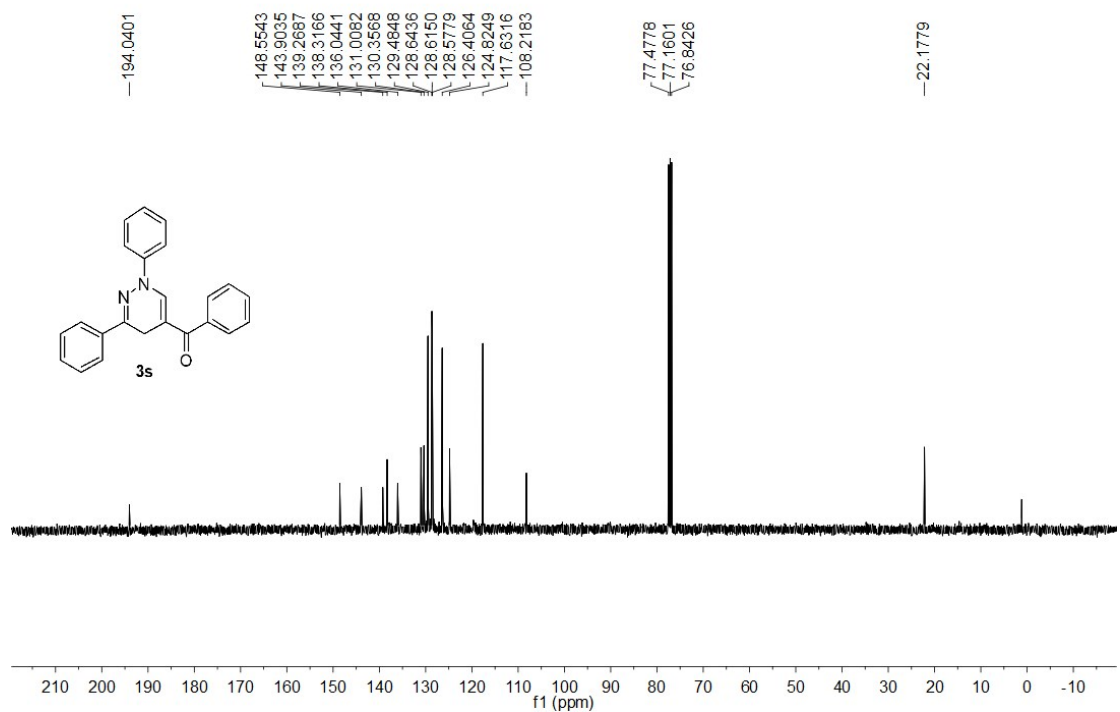

FJJ-R291

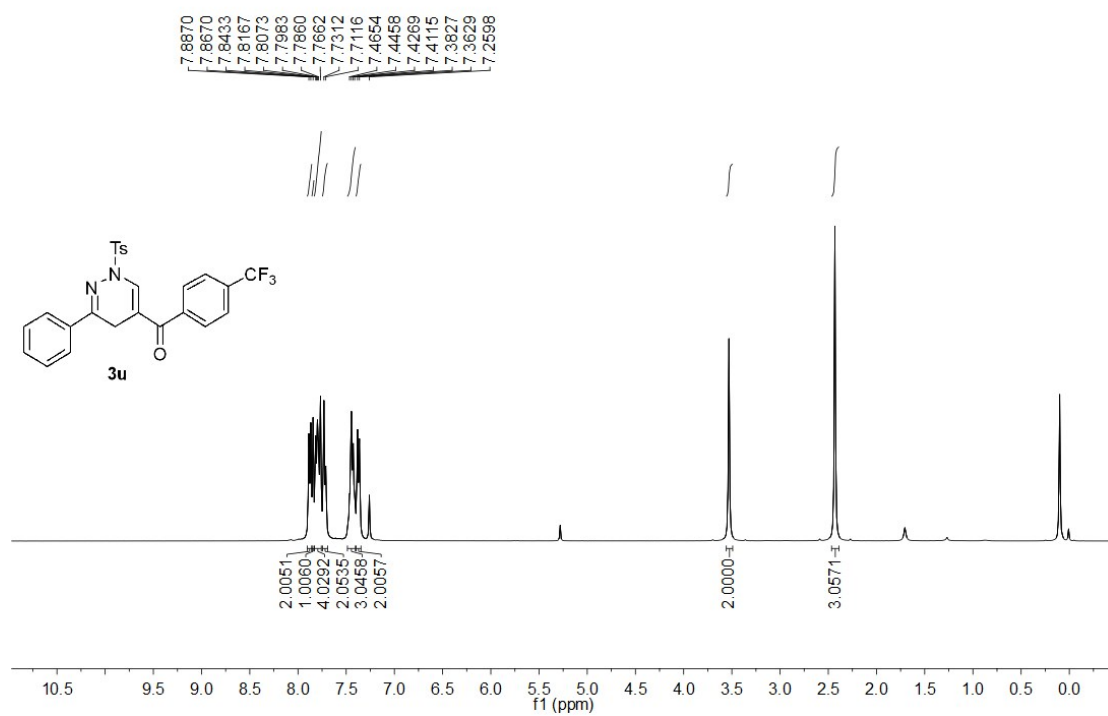

FJJ-R291

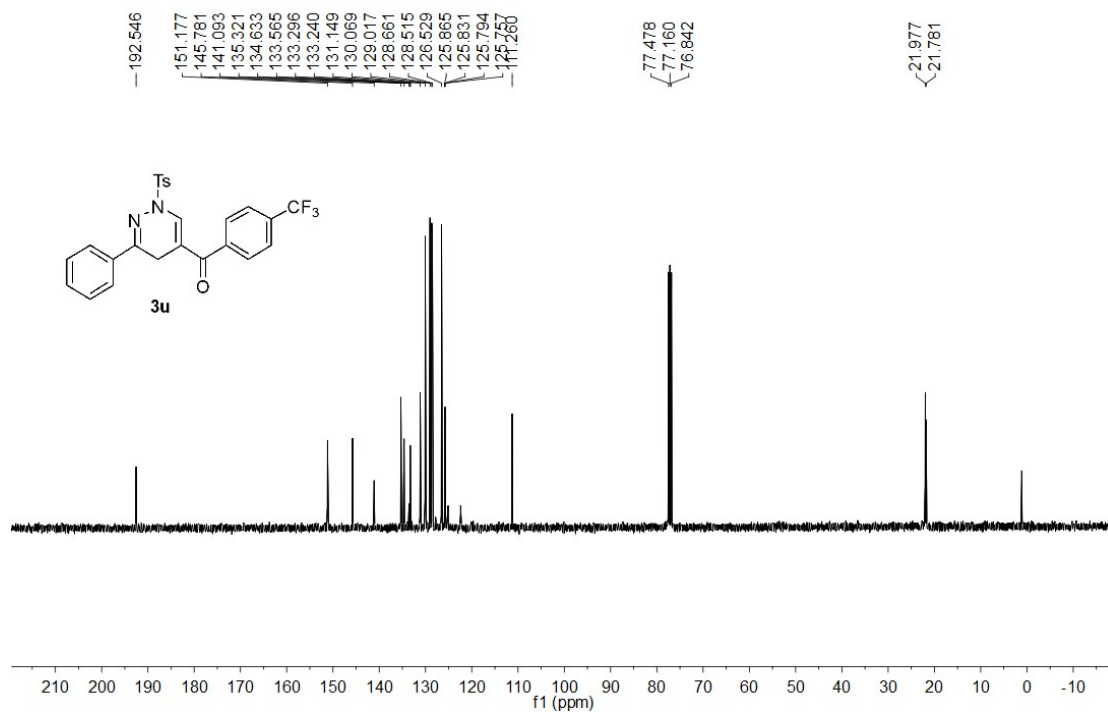



FJJ-R265

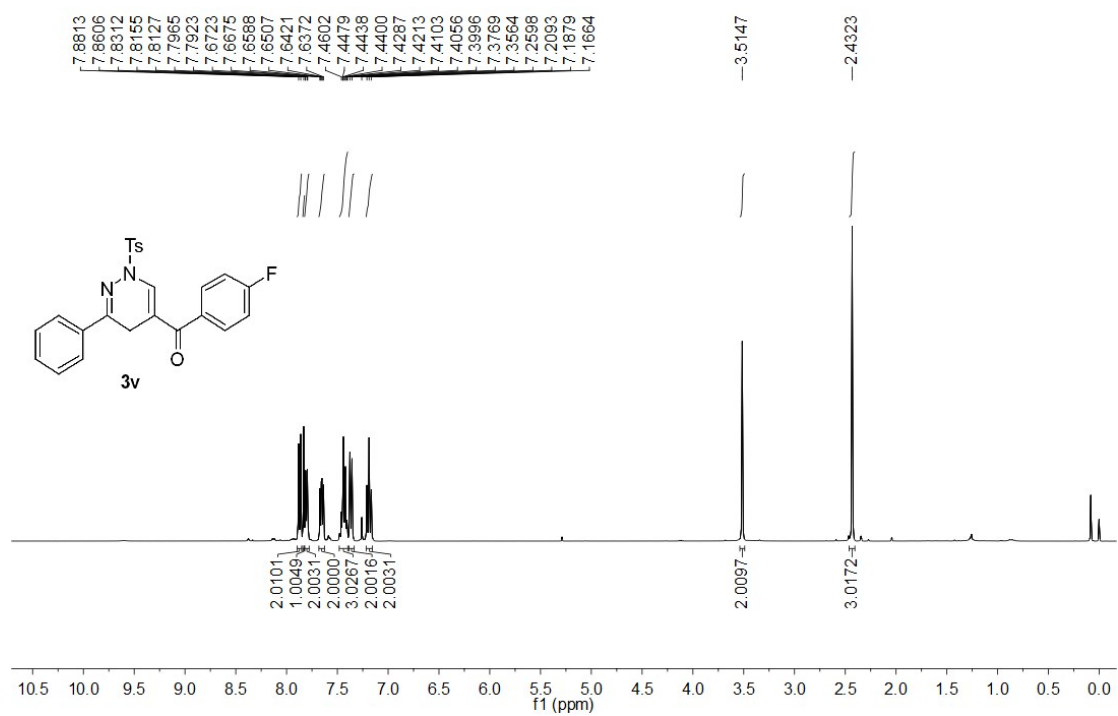

FJJ-R265

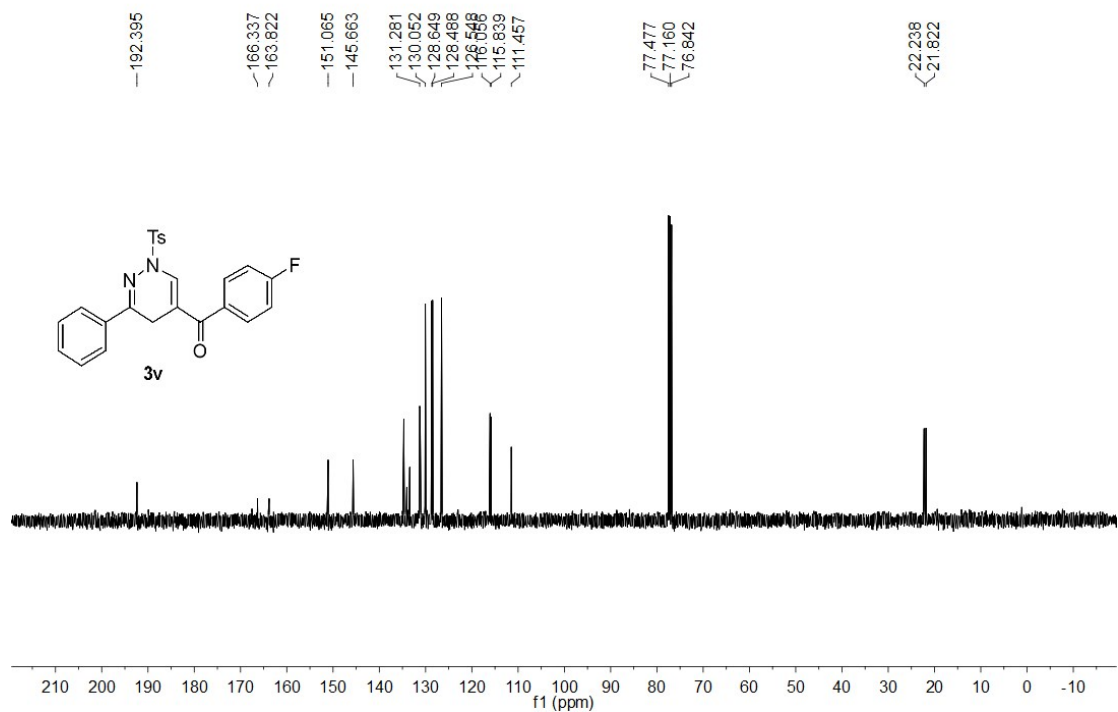

FJJ-R264

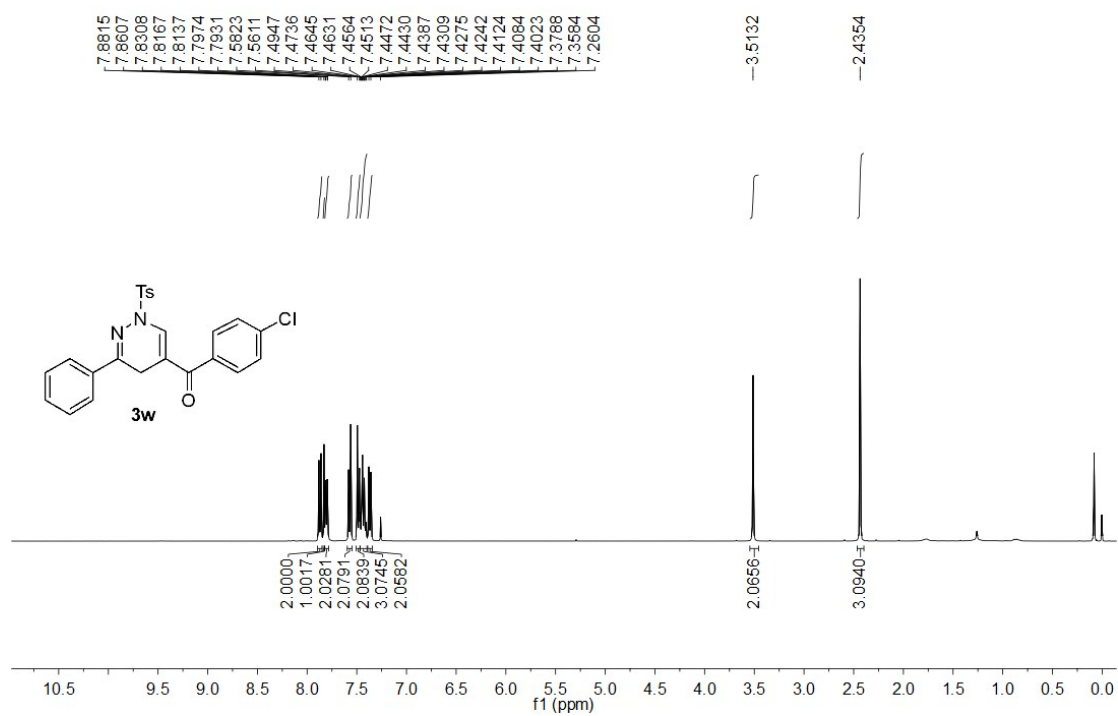

FJJ-R264-C

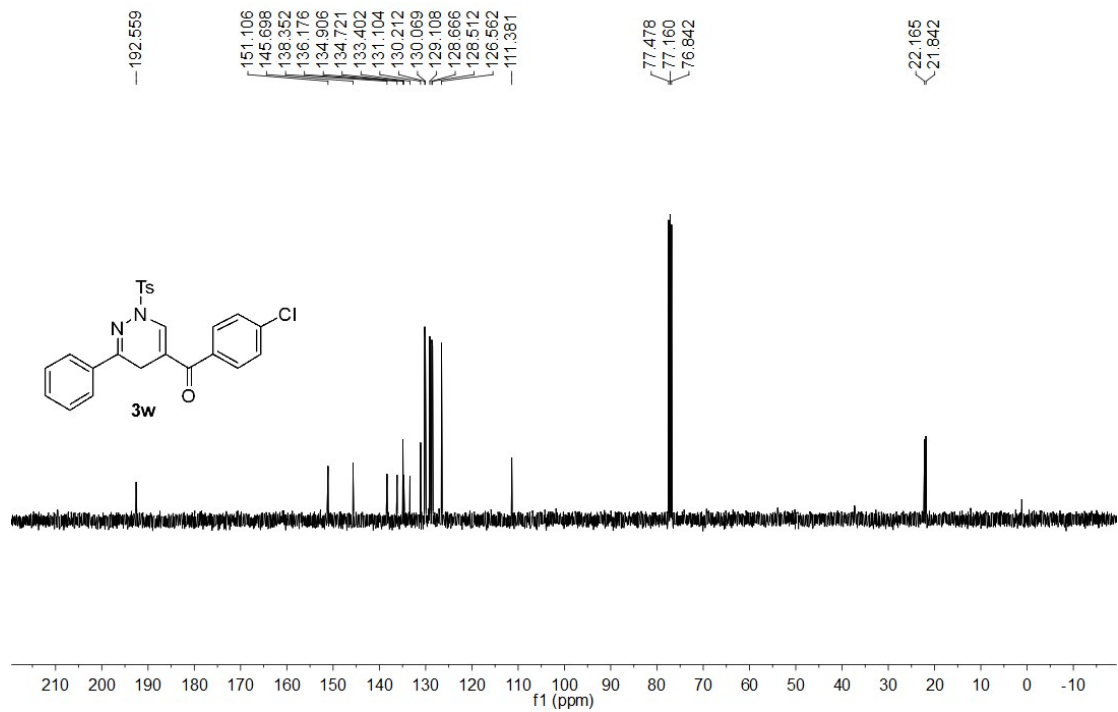

FJJ-R266

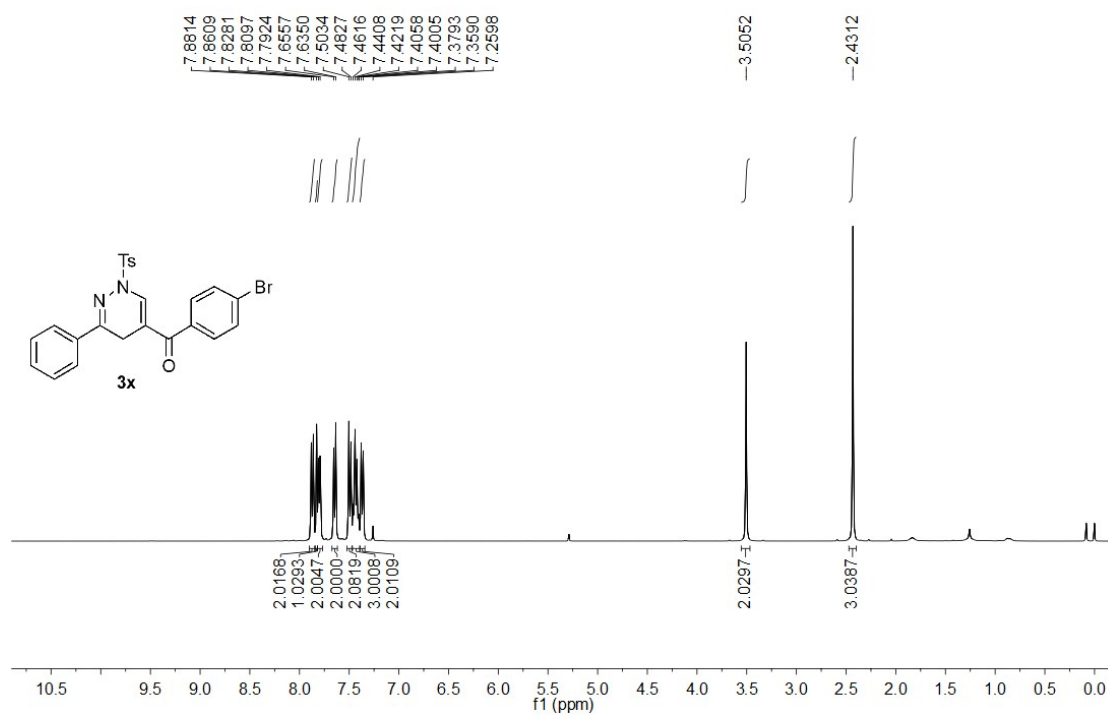

FJJ-R266-C

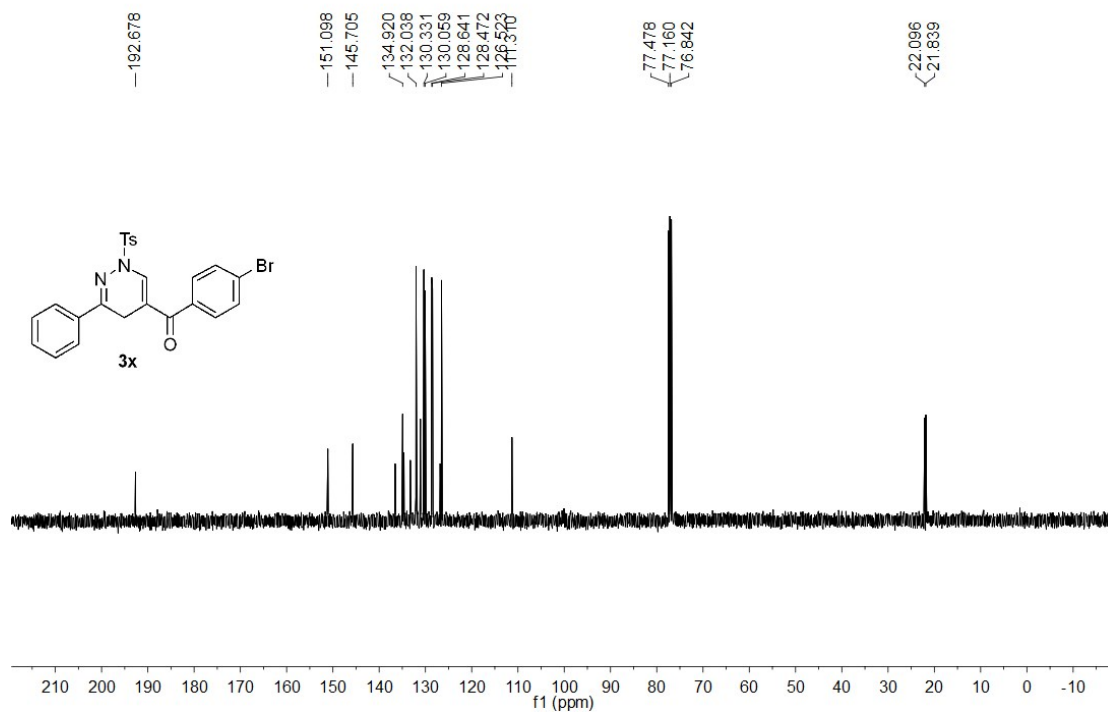

FJJ-R276

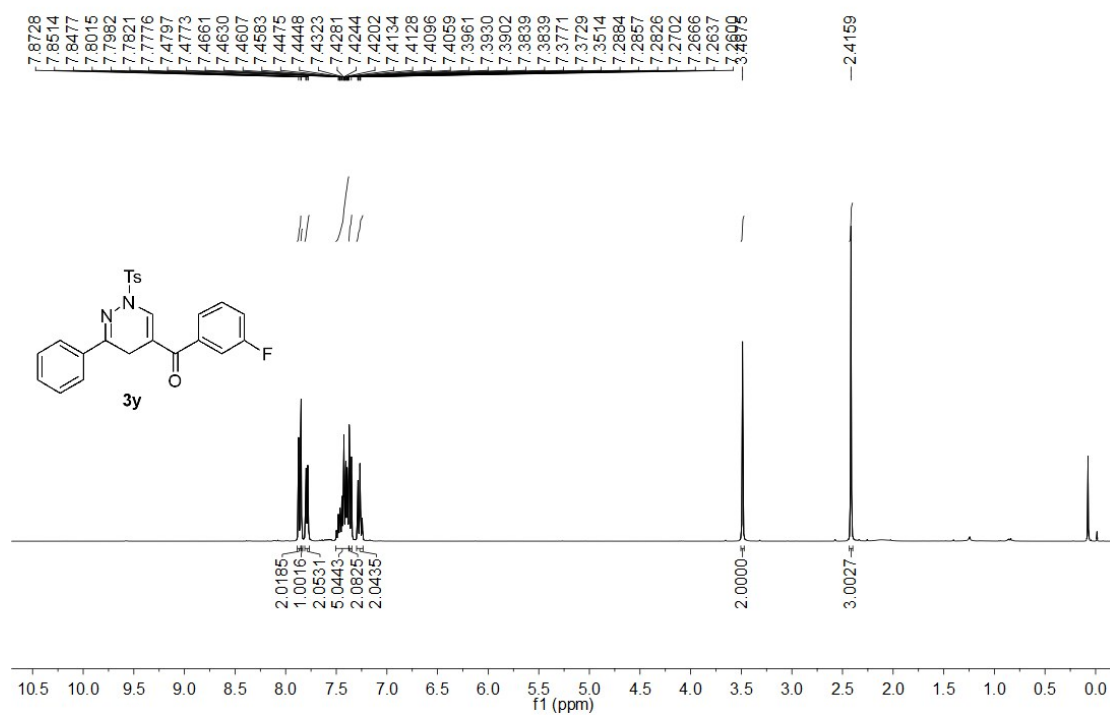

FJJ-R276

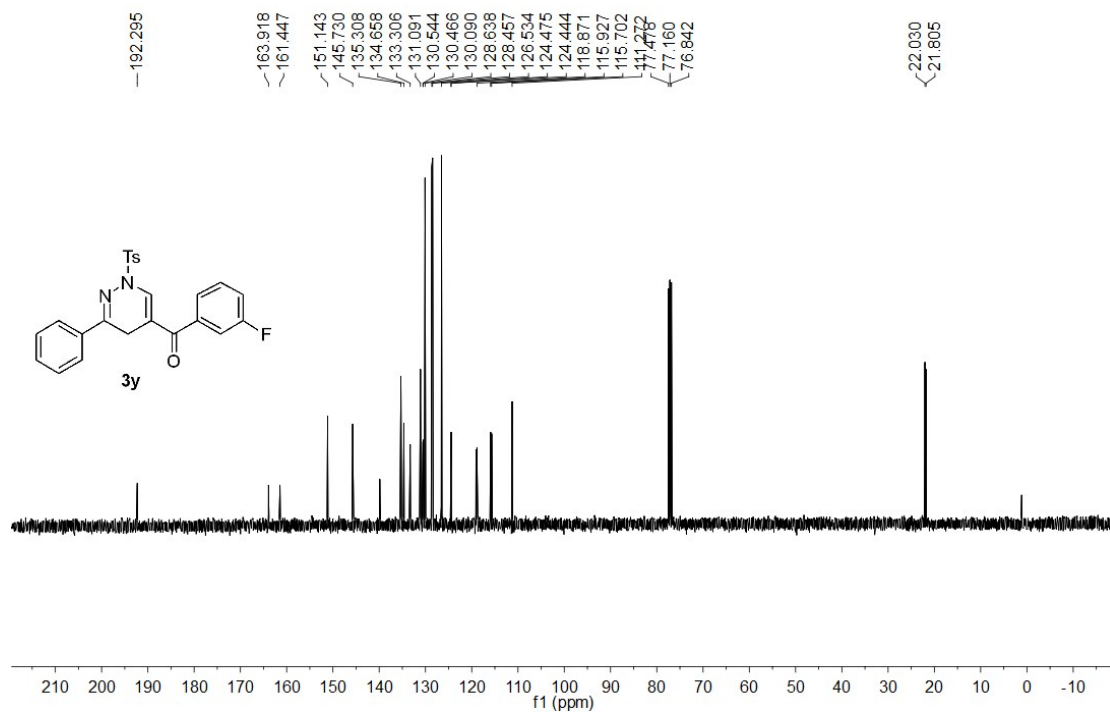

FJJ-R275

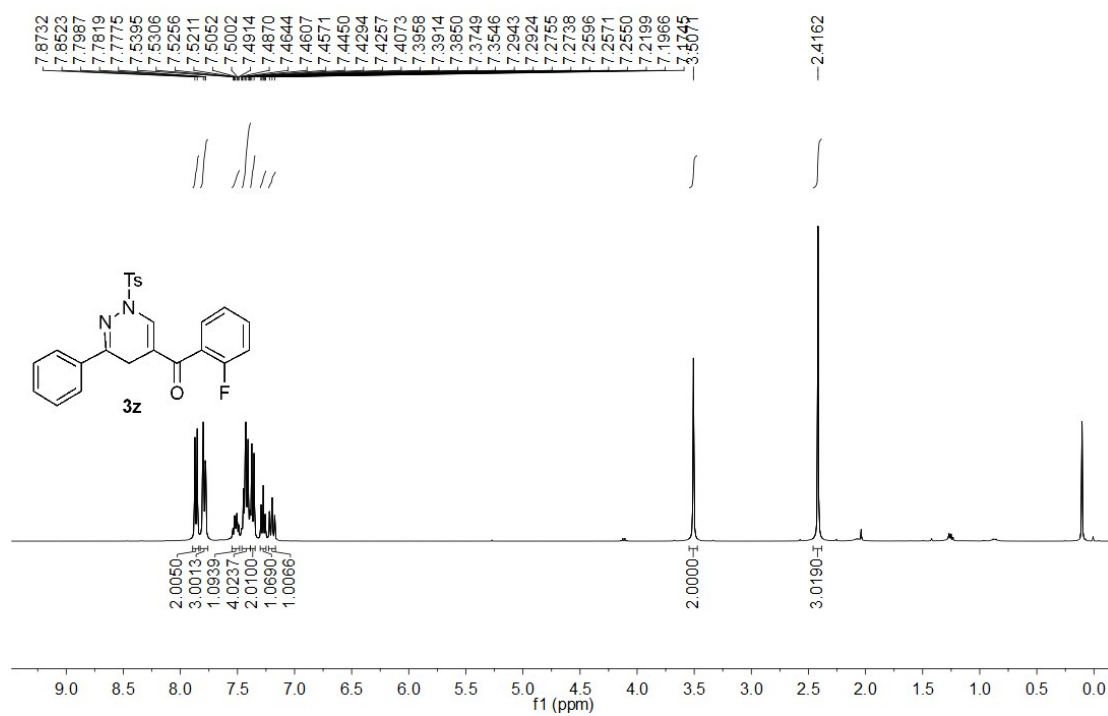

FJJ-R275

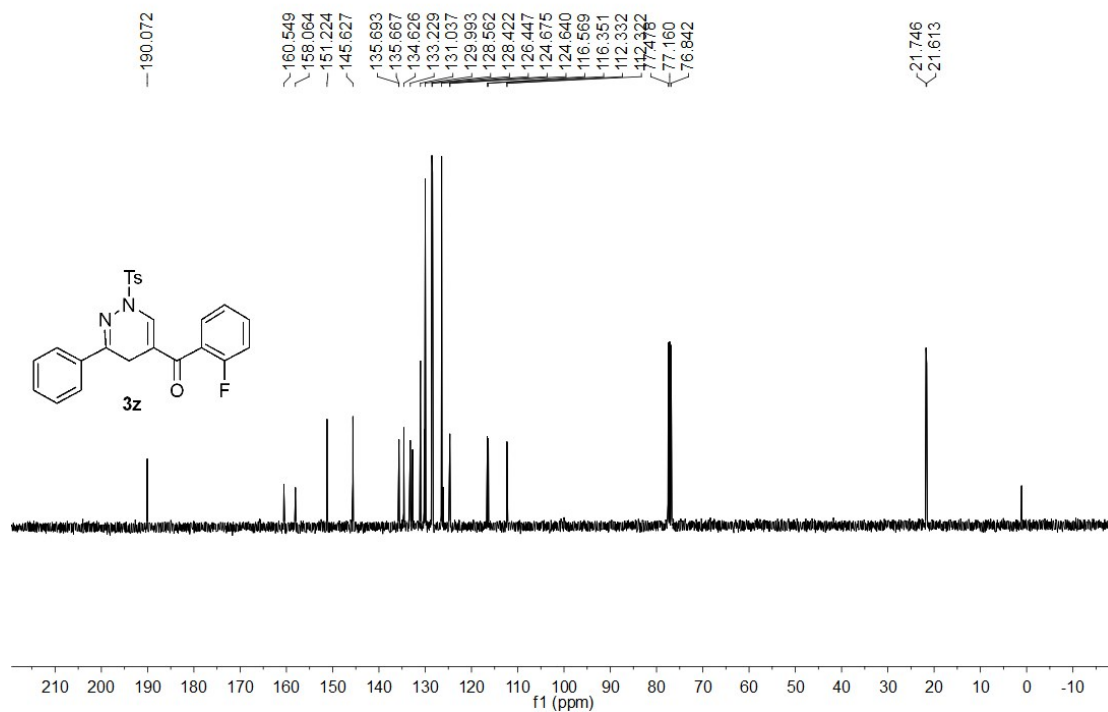

FJJ-R269

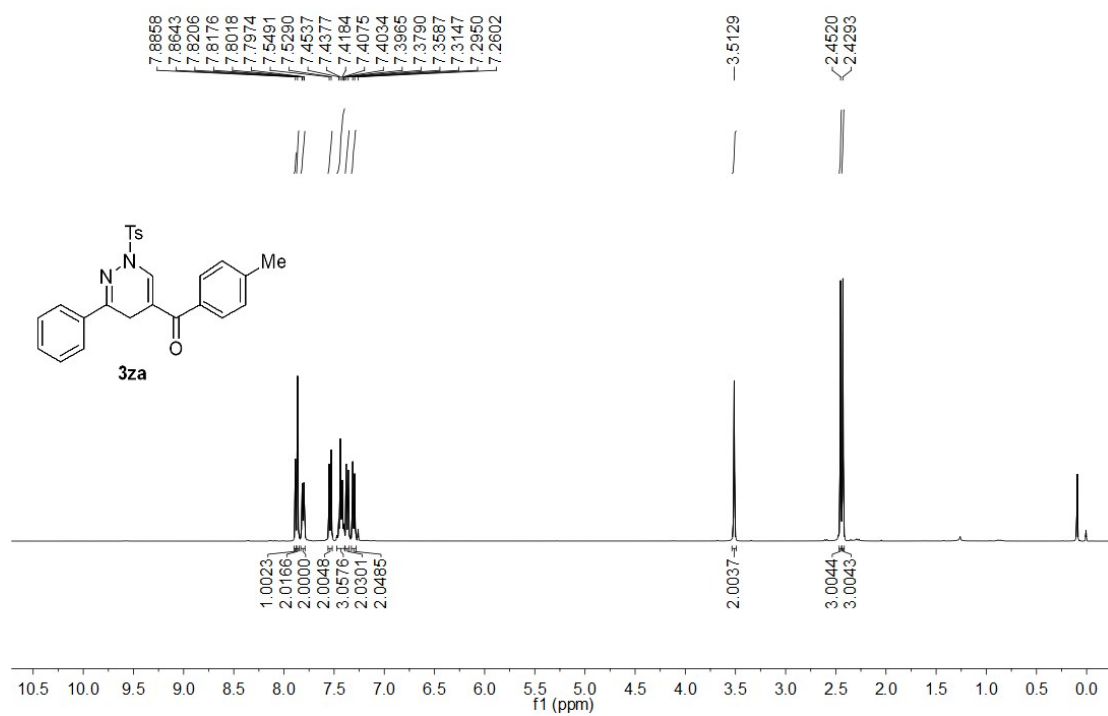

FJJ-R269

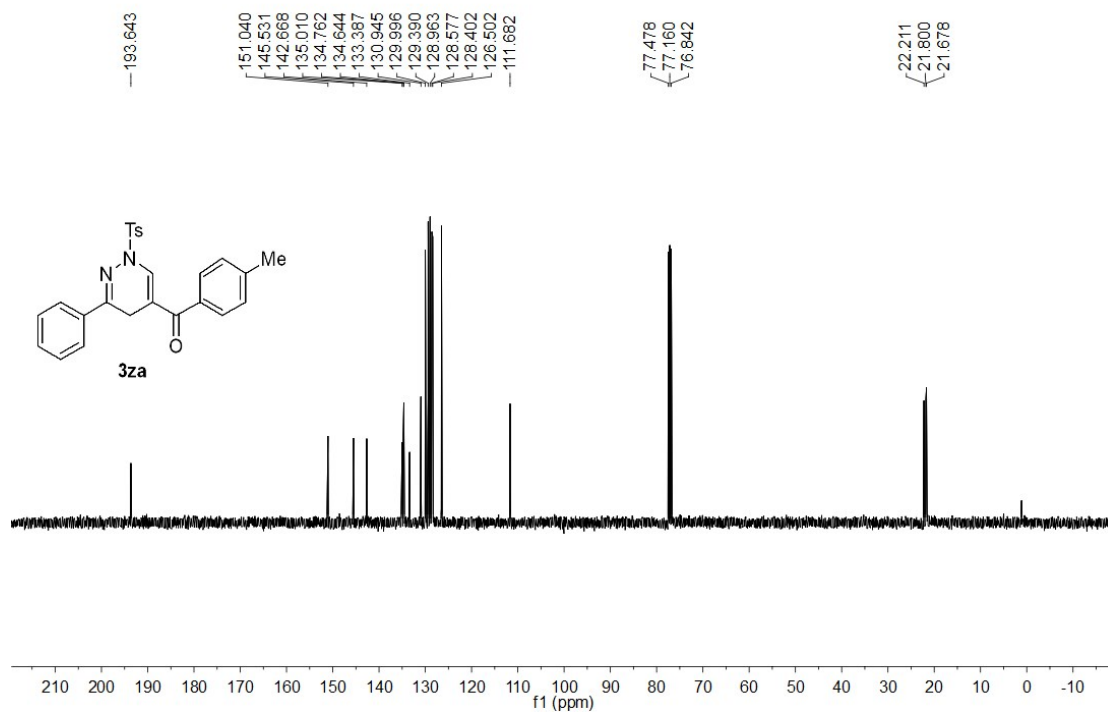

FJJ-R267-

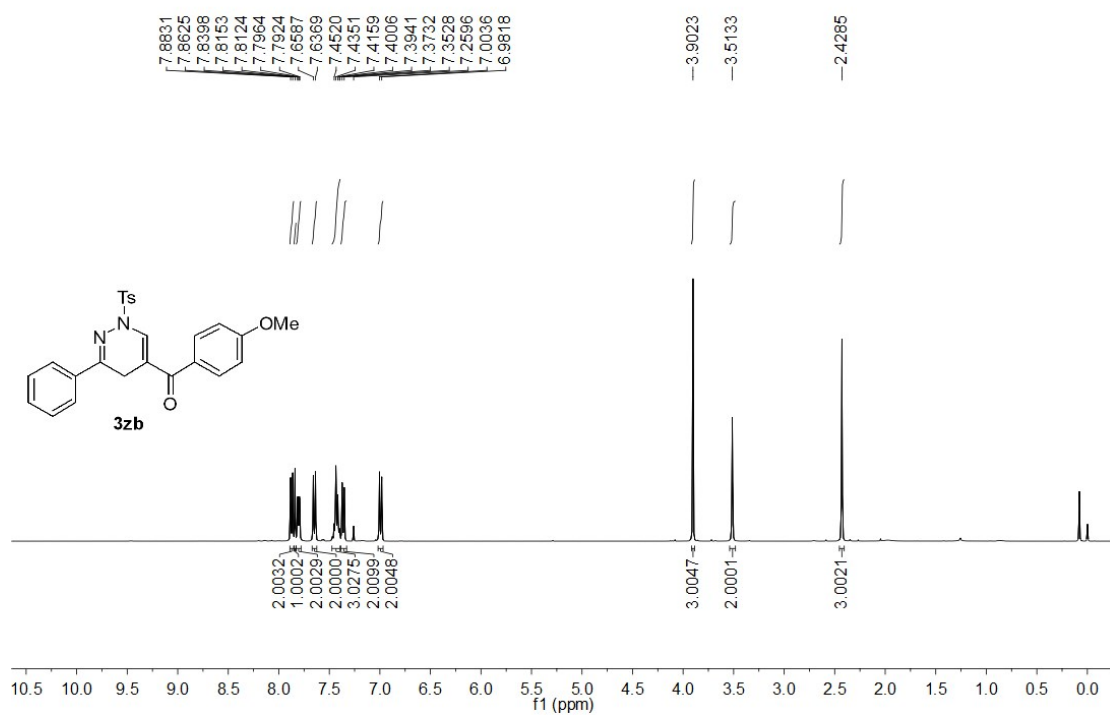

FJJ-R267-

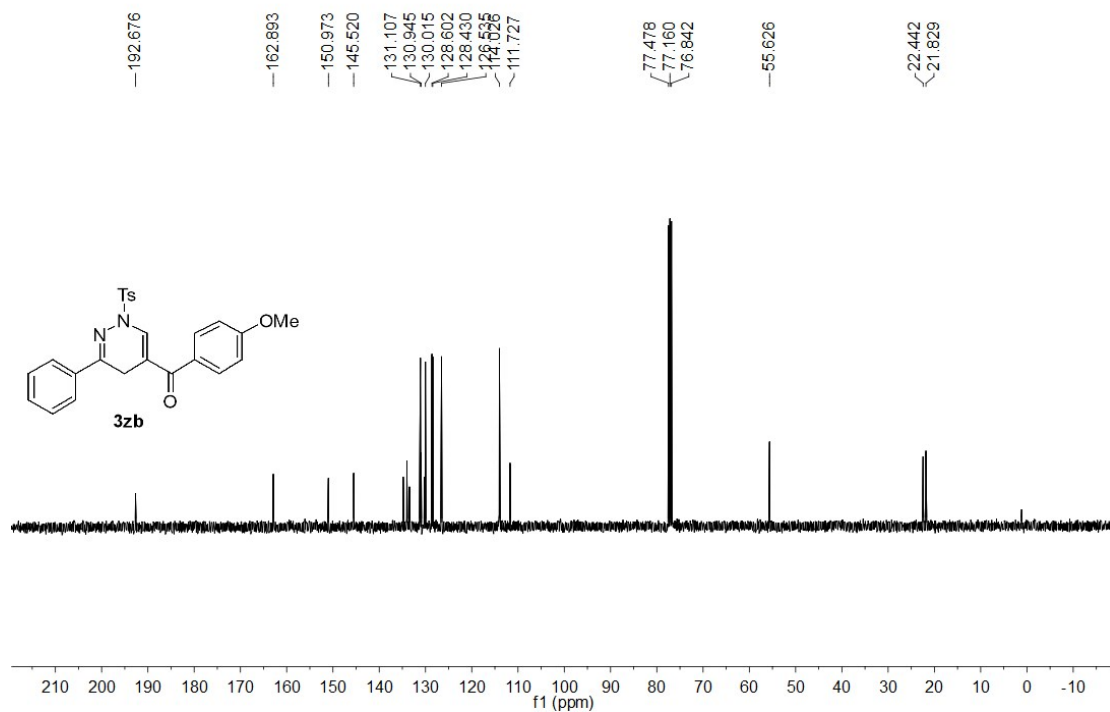

FJJ-R287

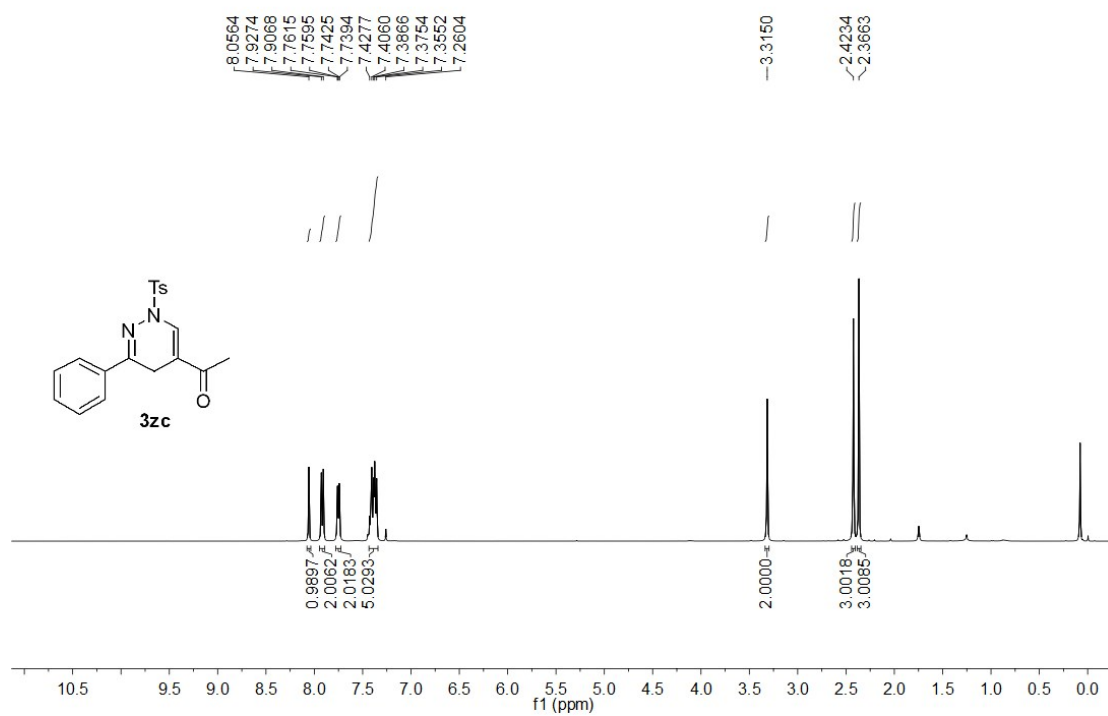

FJJ-R287

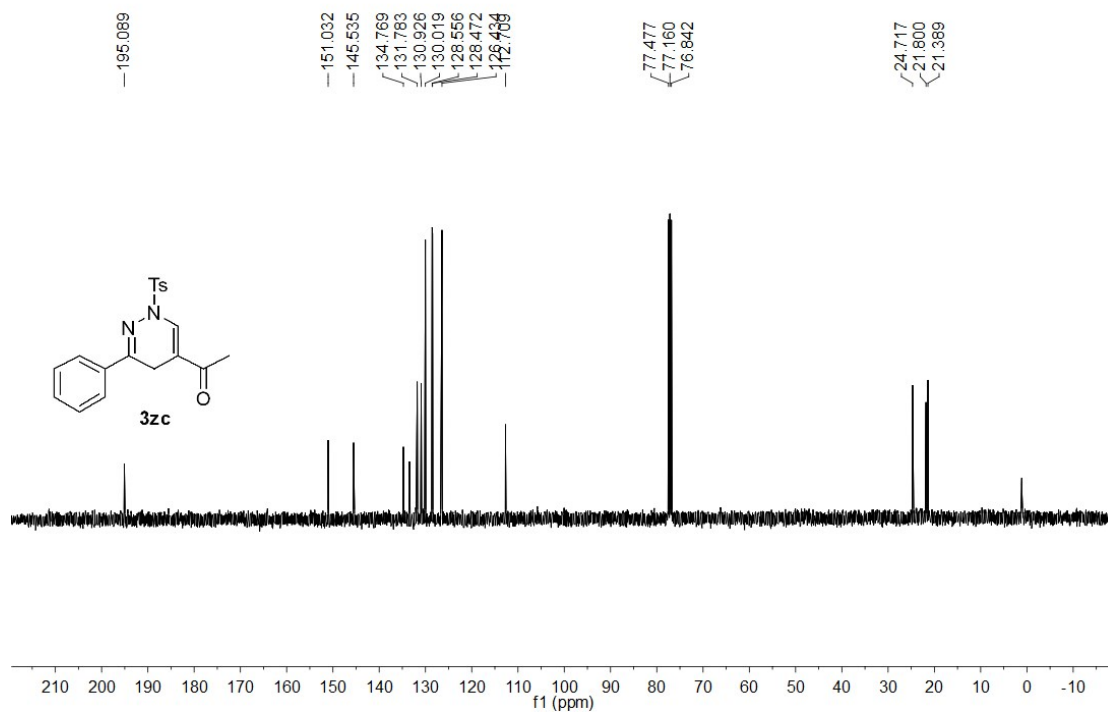



FJJ-R272

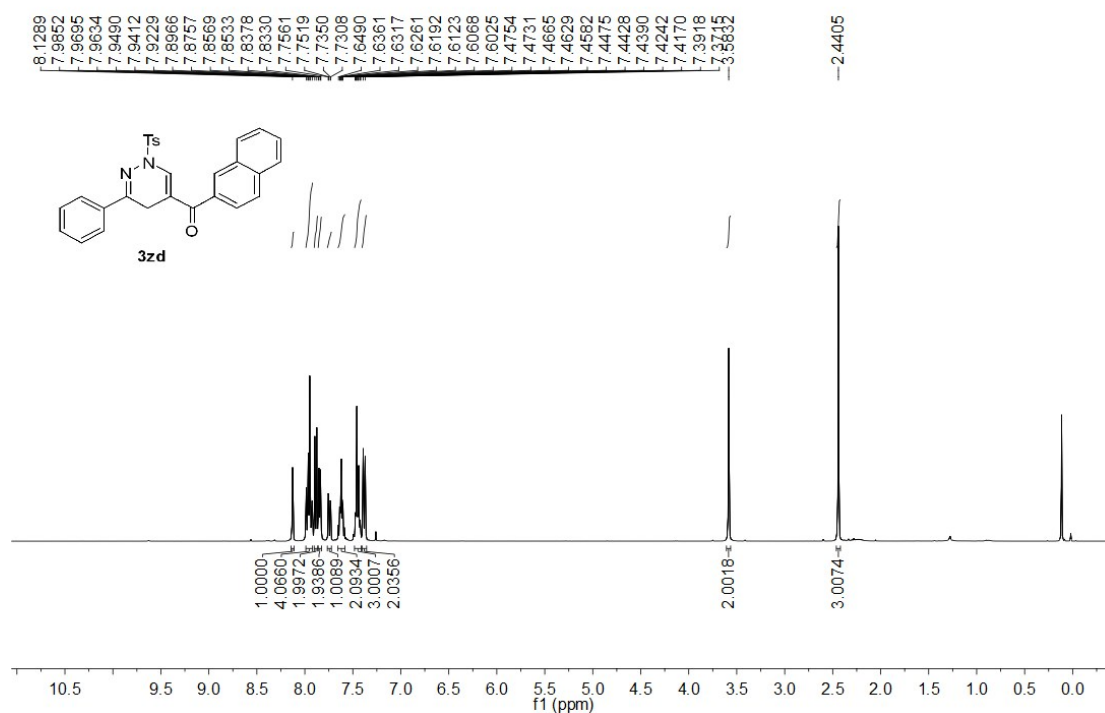

FJJ-R272

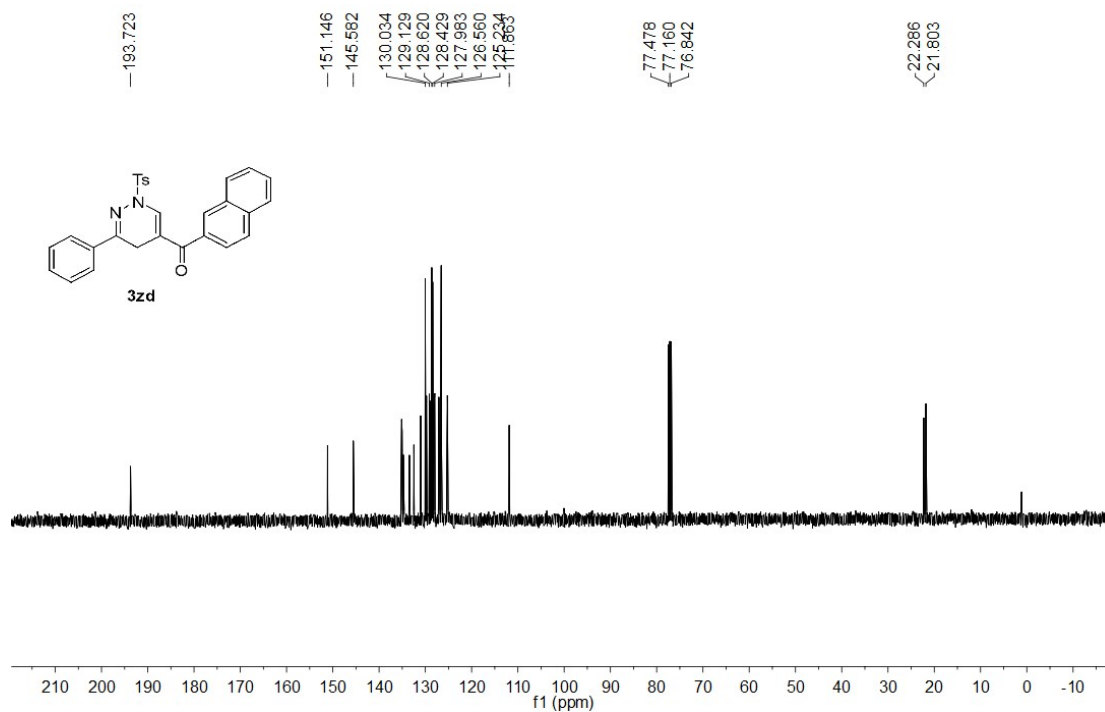

FJJ-R274

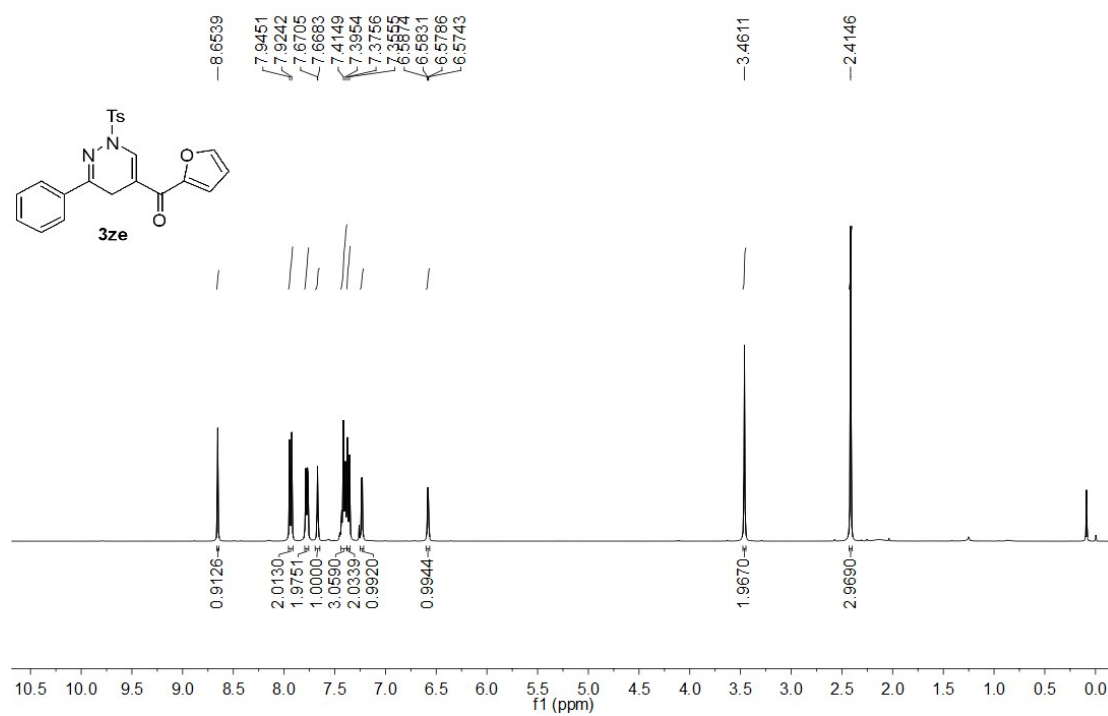

FJJ-R274

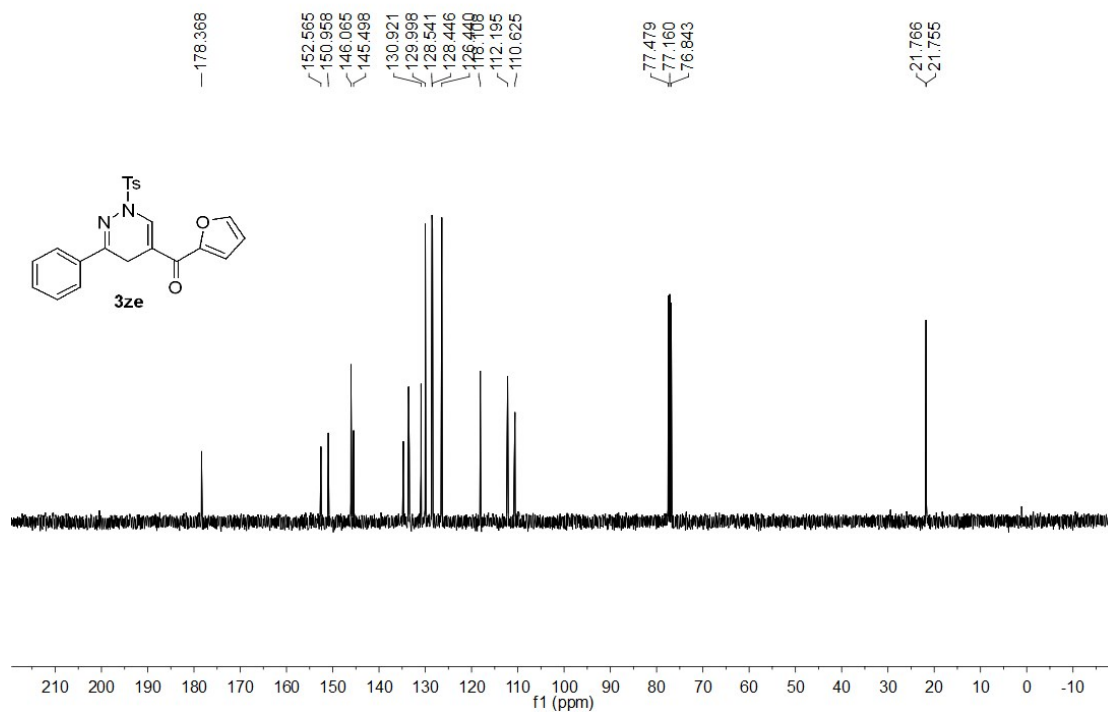

FJJ-R270

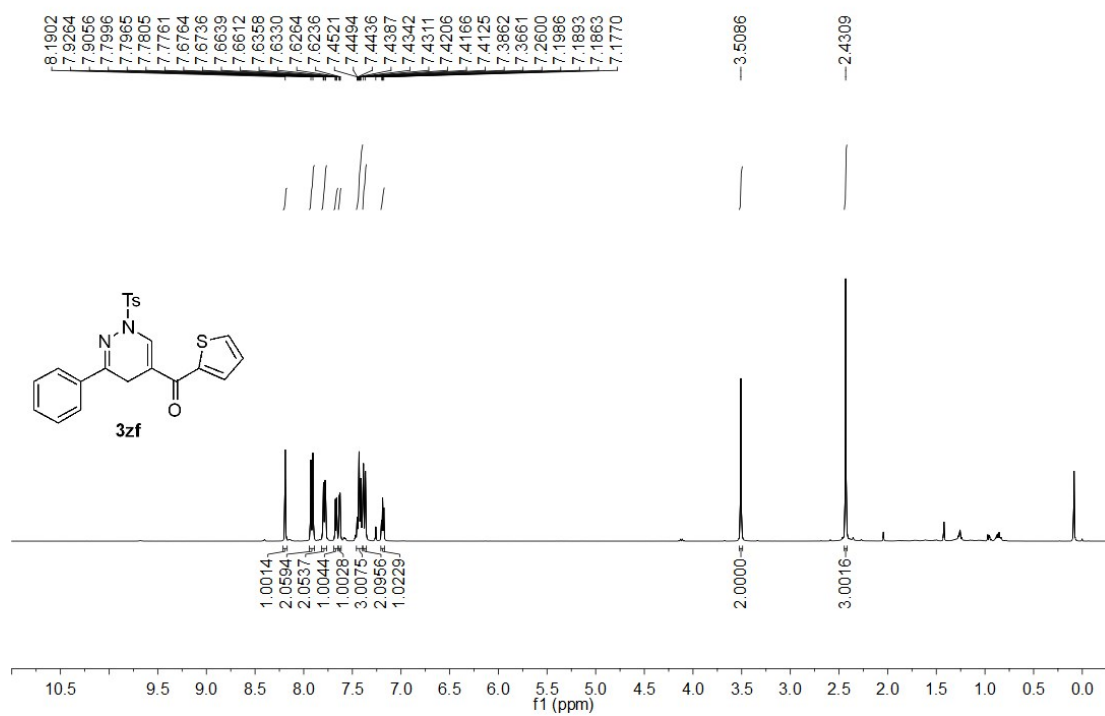

FJJ-R270

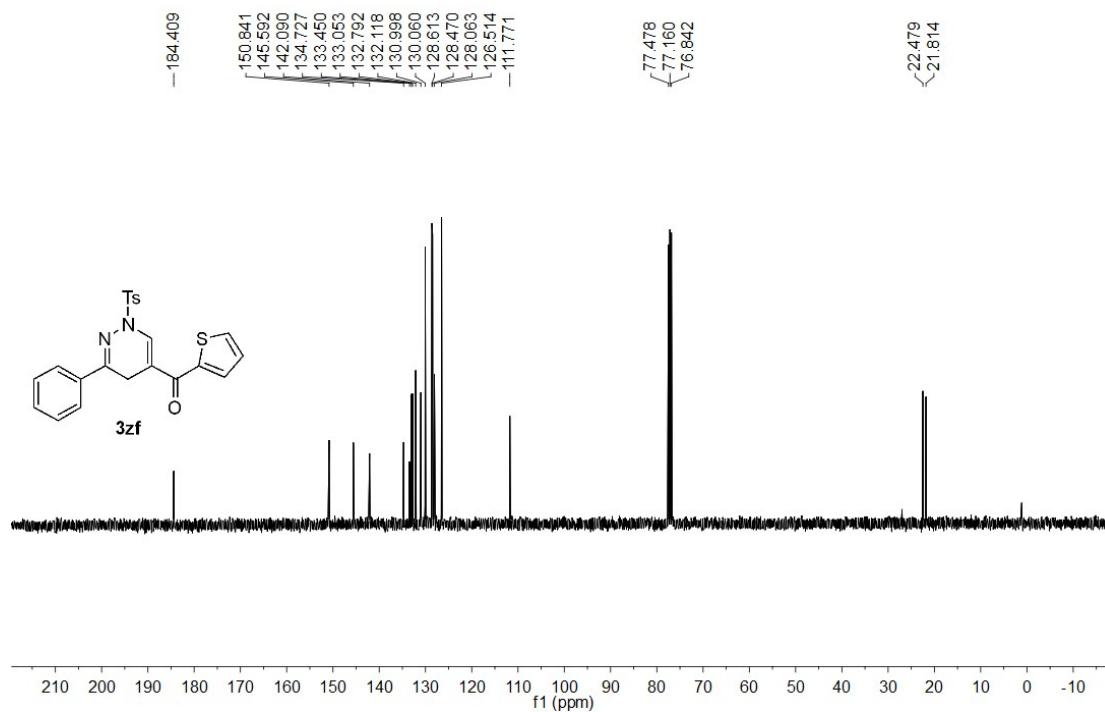

FJJ-R214

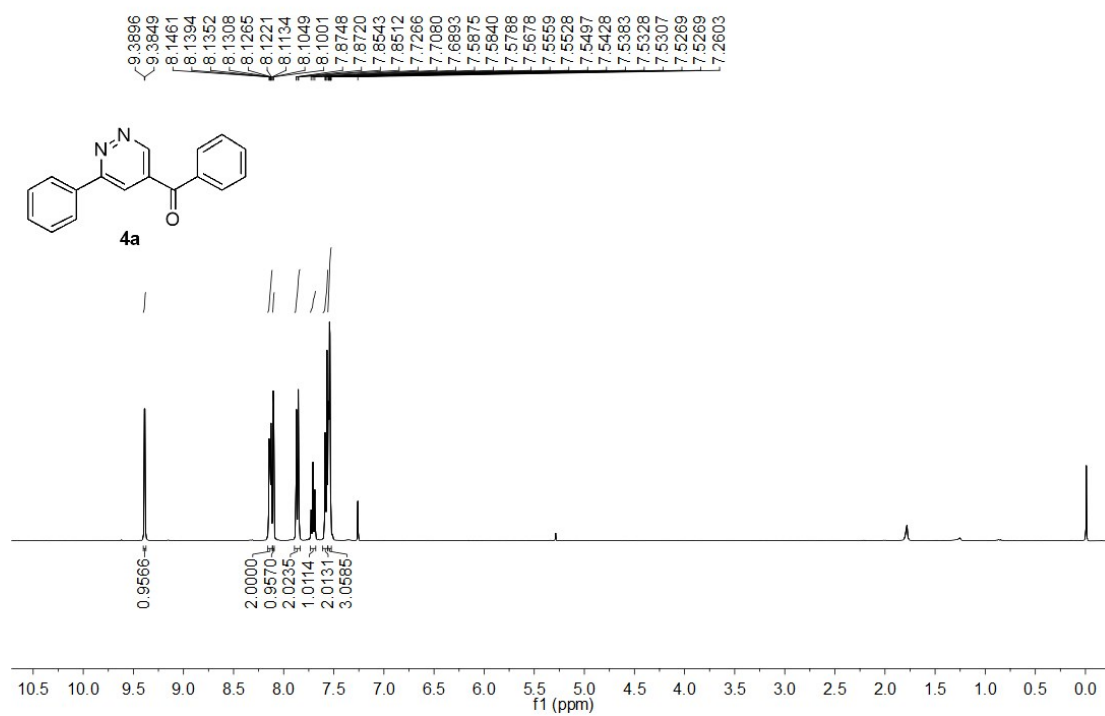

FJJ-R214

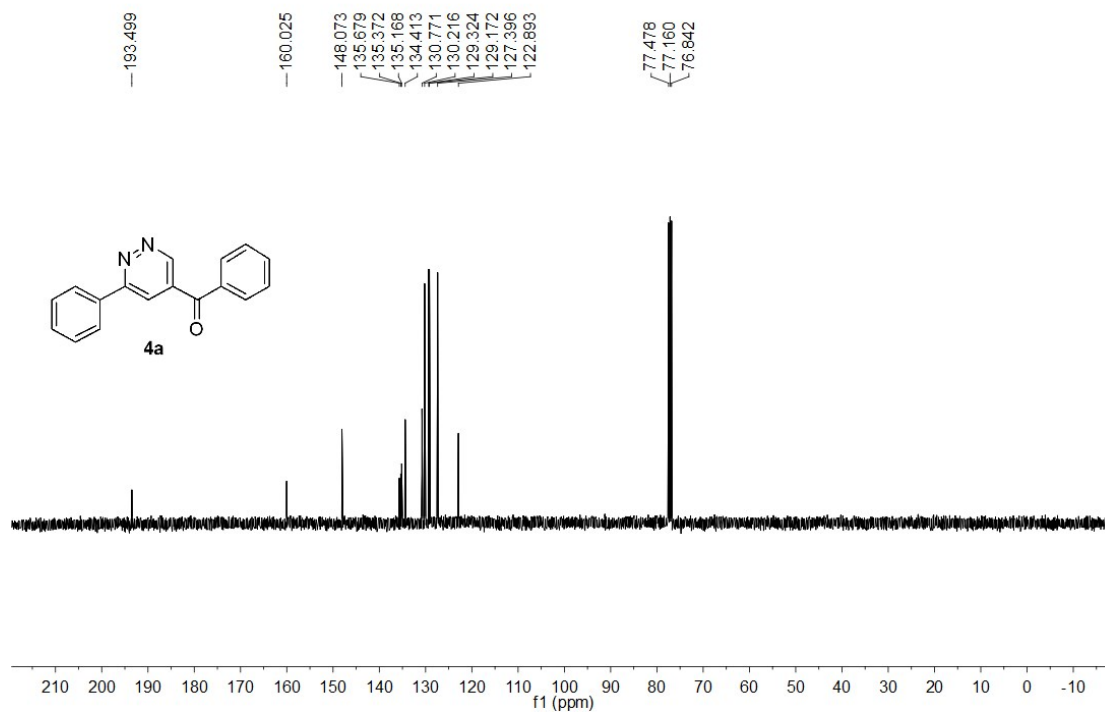

FJJ-0BC-1H, C

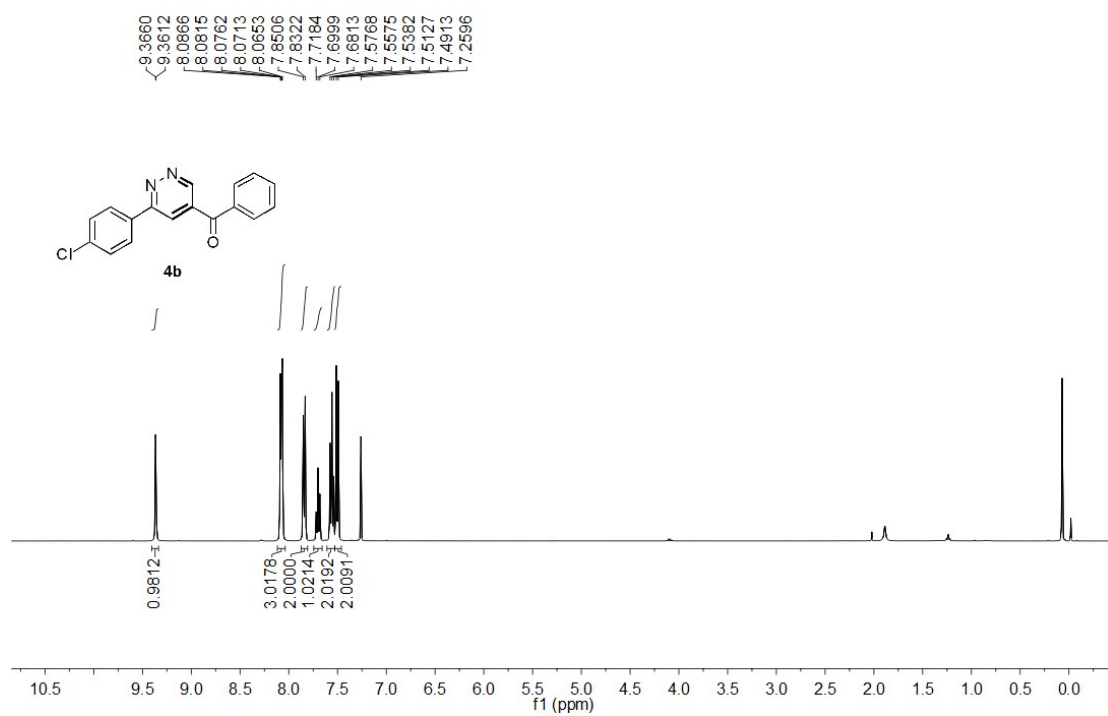

FJJ-0BC-1H, C

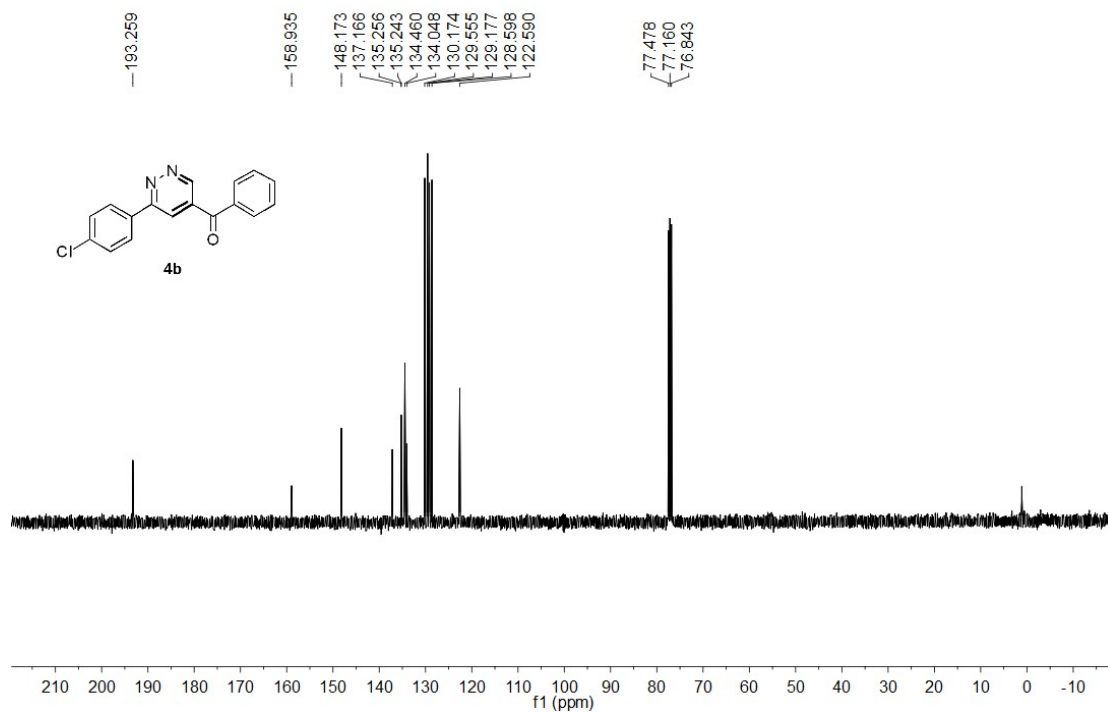

FJJ-R273

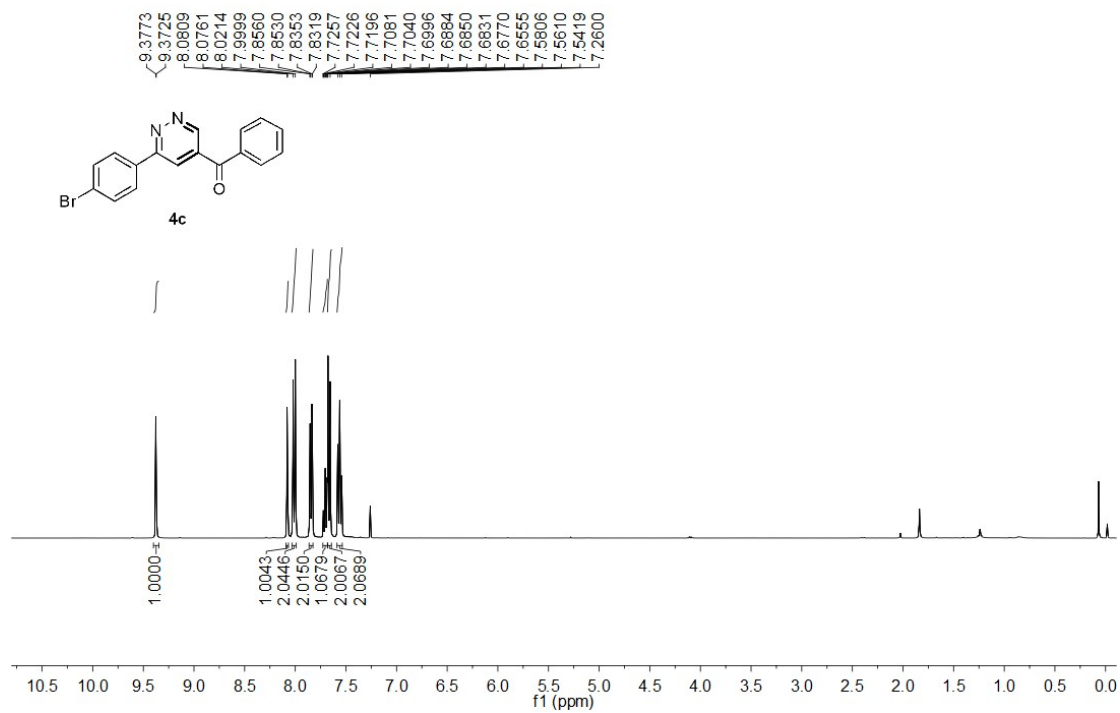

FJJ-R271-2

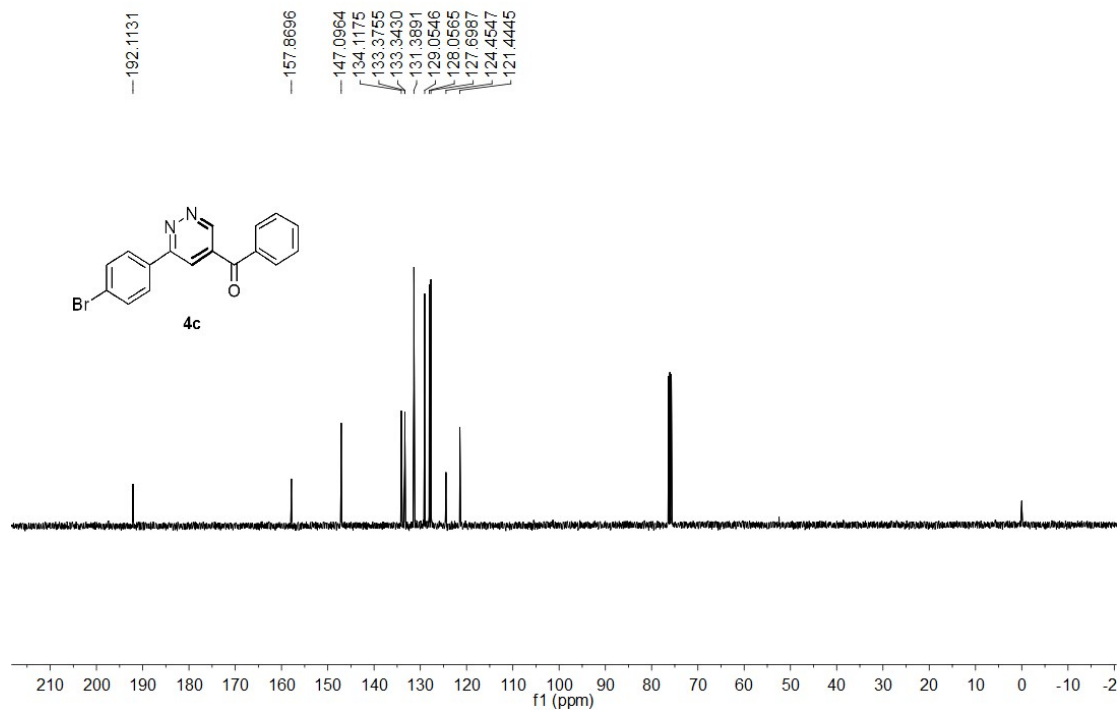

FJJ-0BC-2

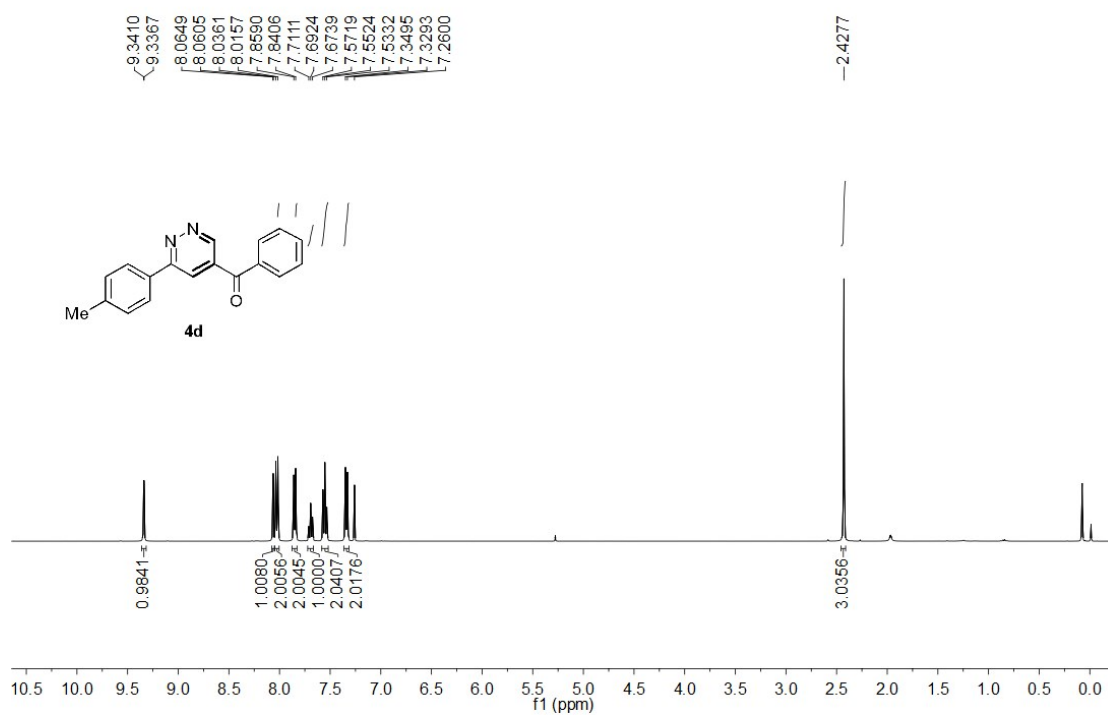

FJJ-0BC-2

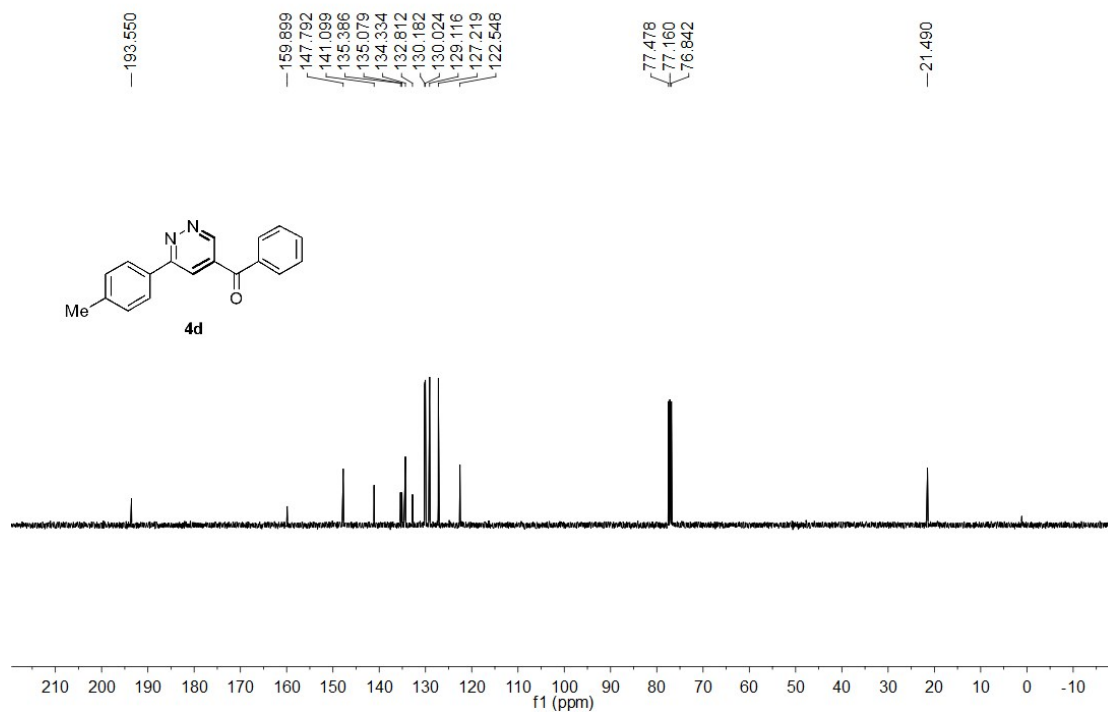

FJJ-R271

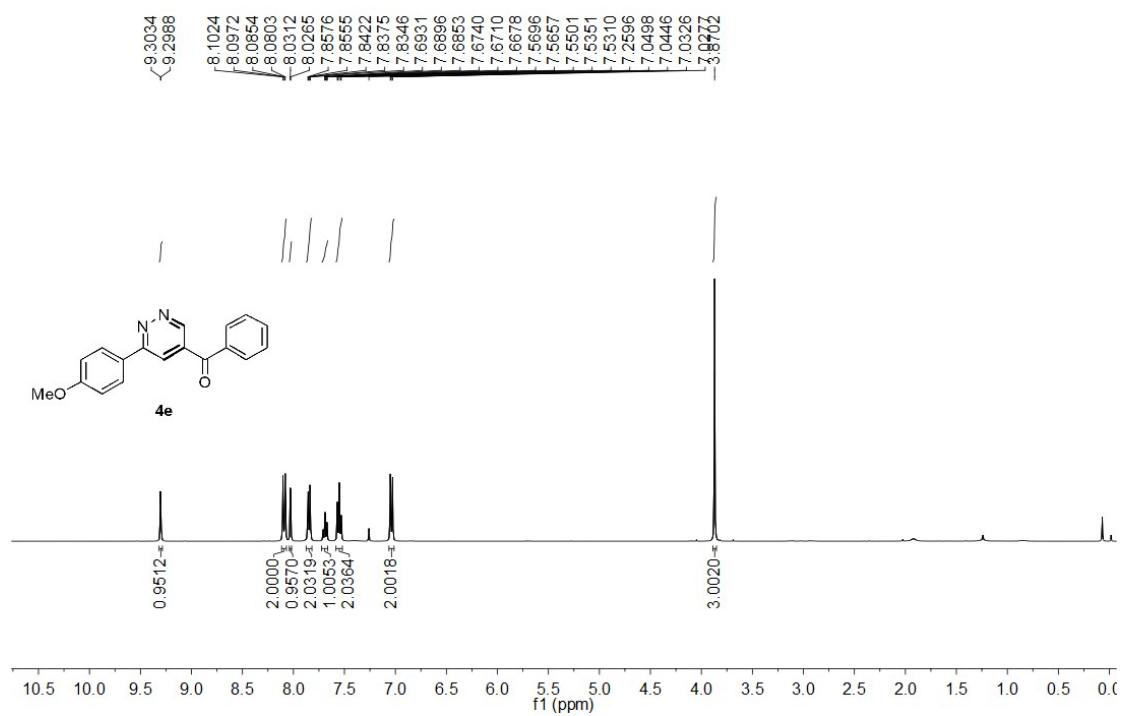

FJJ-R271

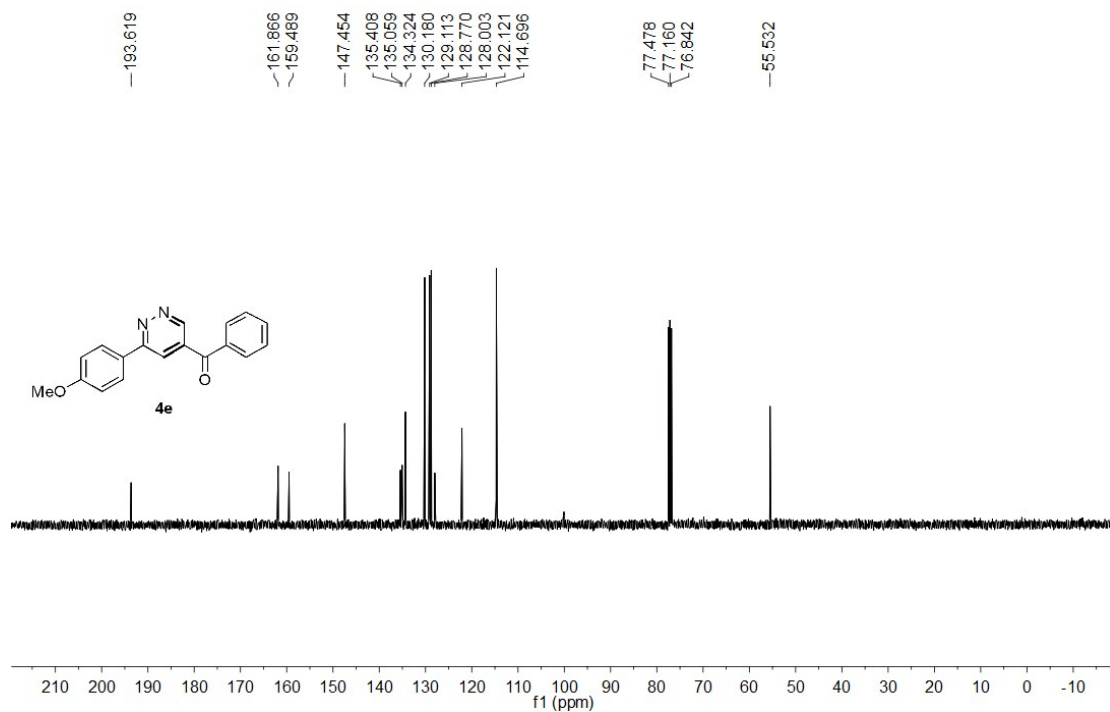



FJJ-R279

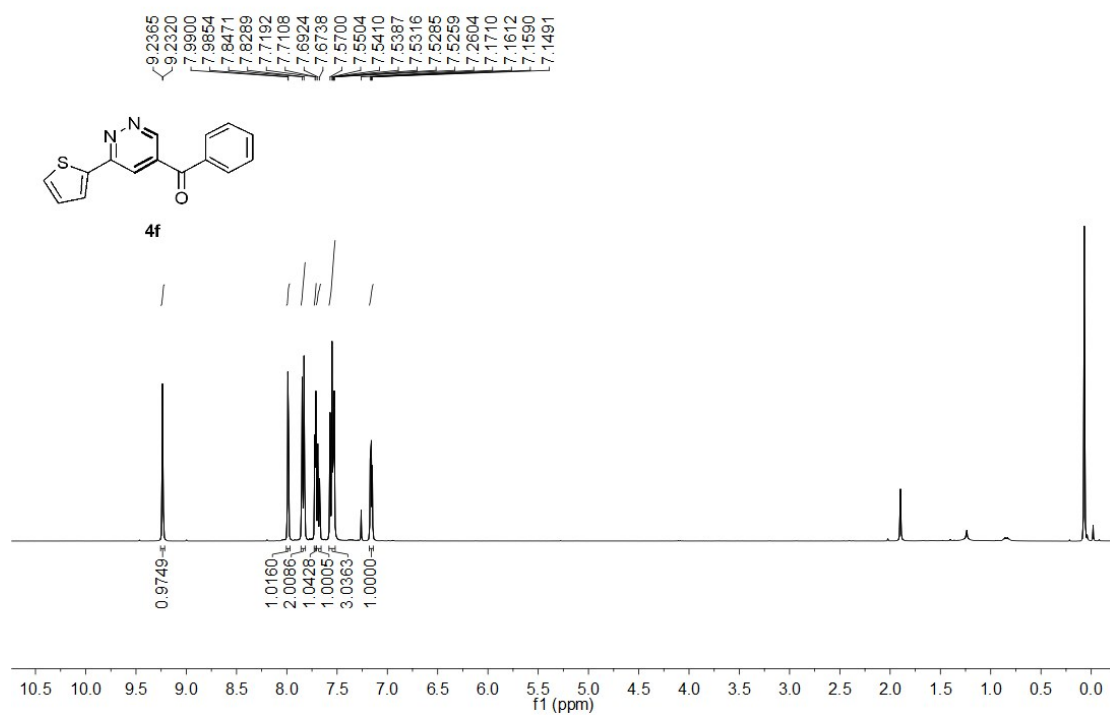

FJJ-R279

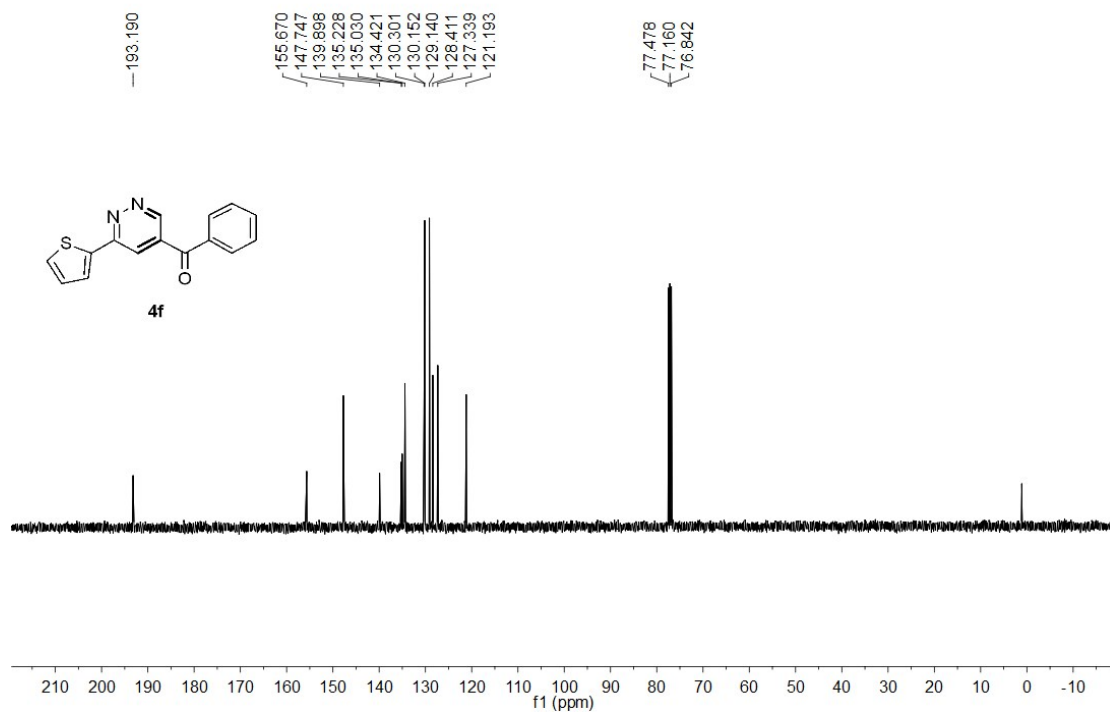

FJJ-0BC-3H, C

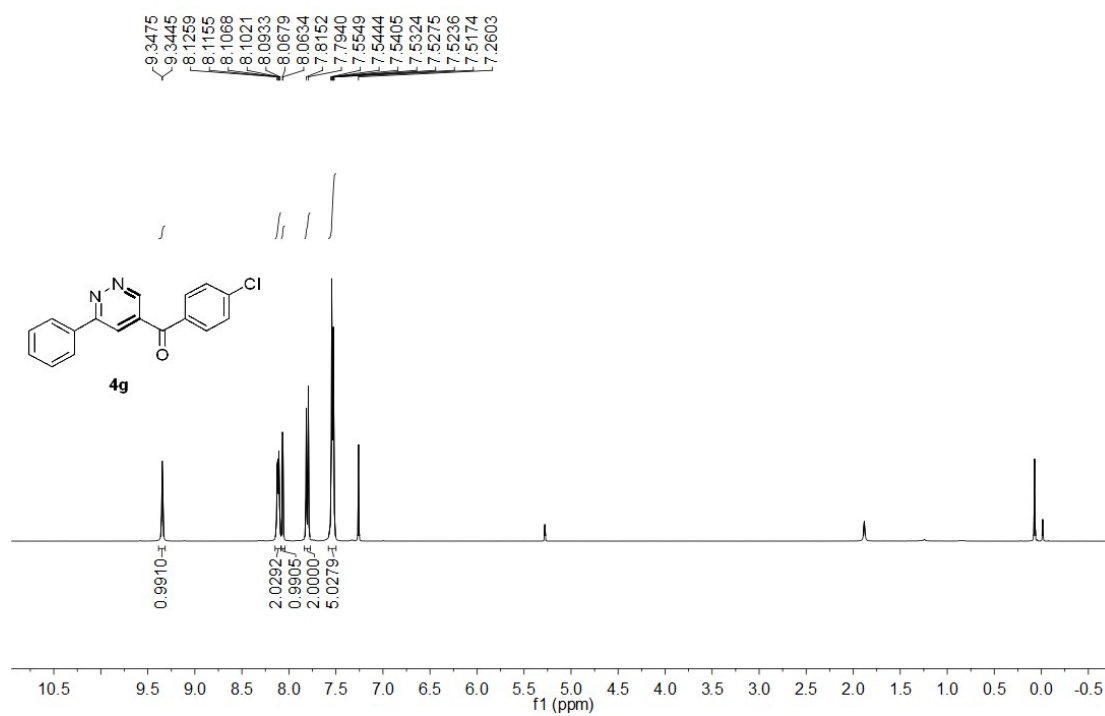

FJJ-0BC-3C

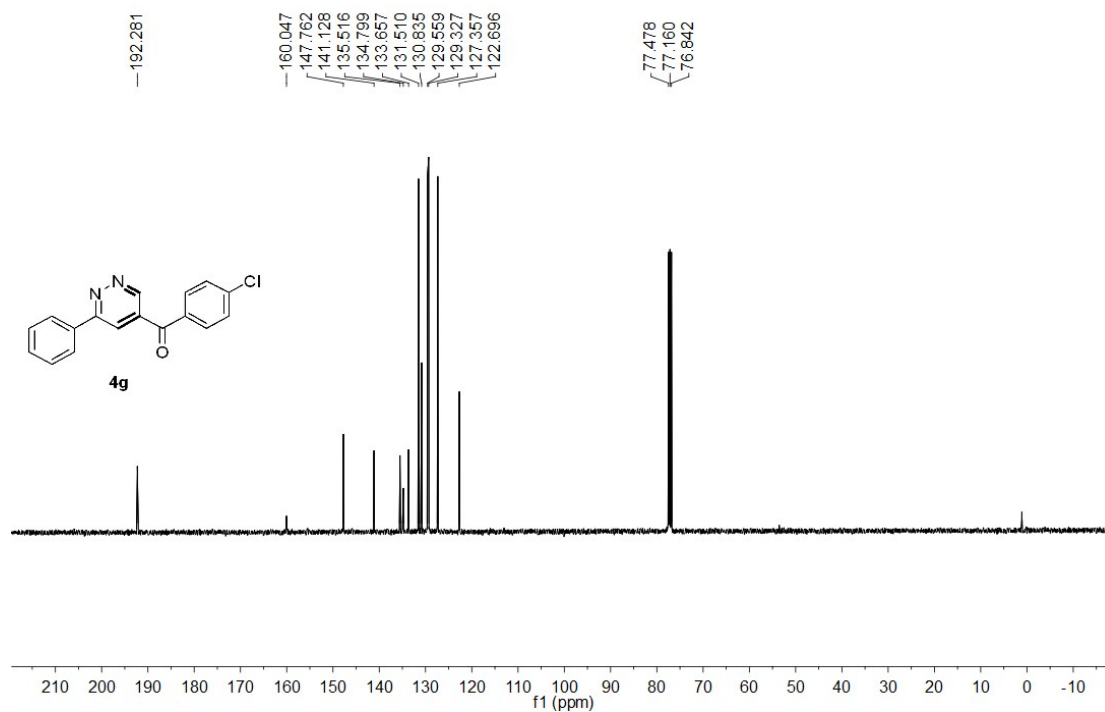

FJJ-R278

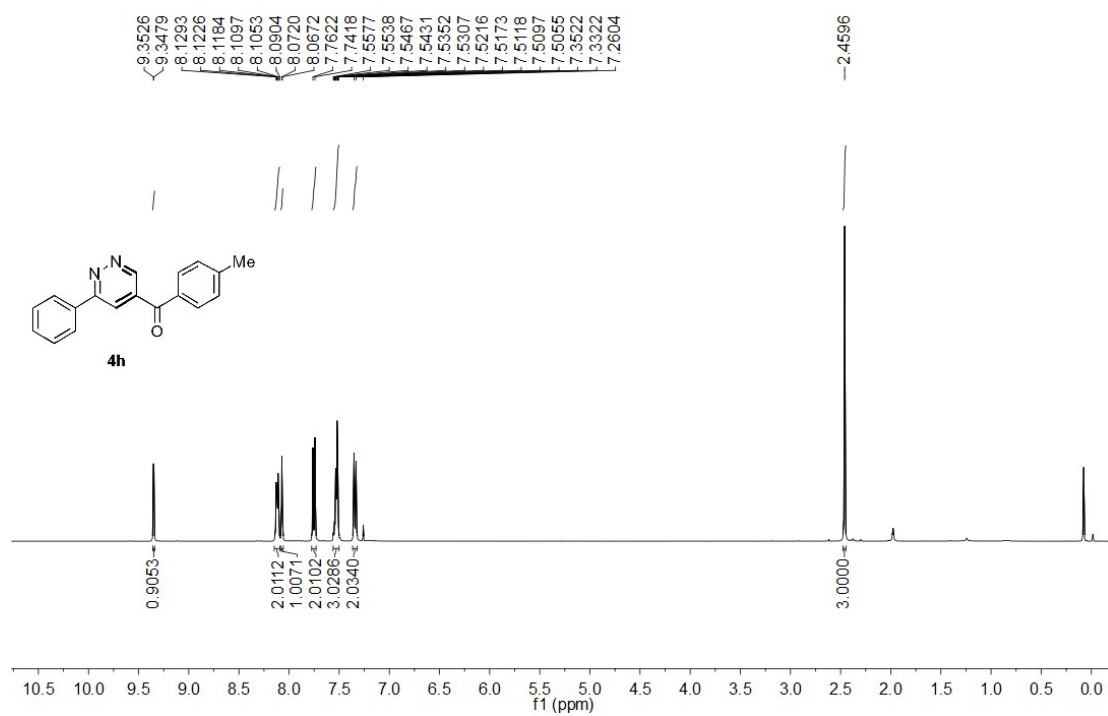

FJJ-R278

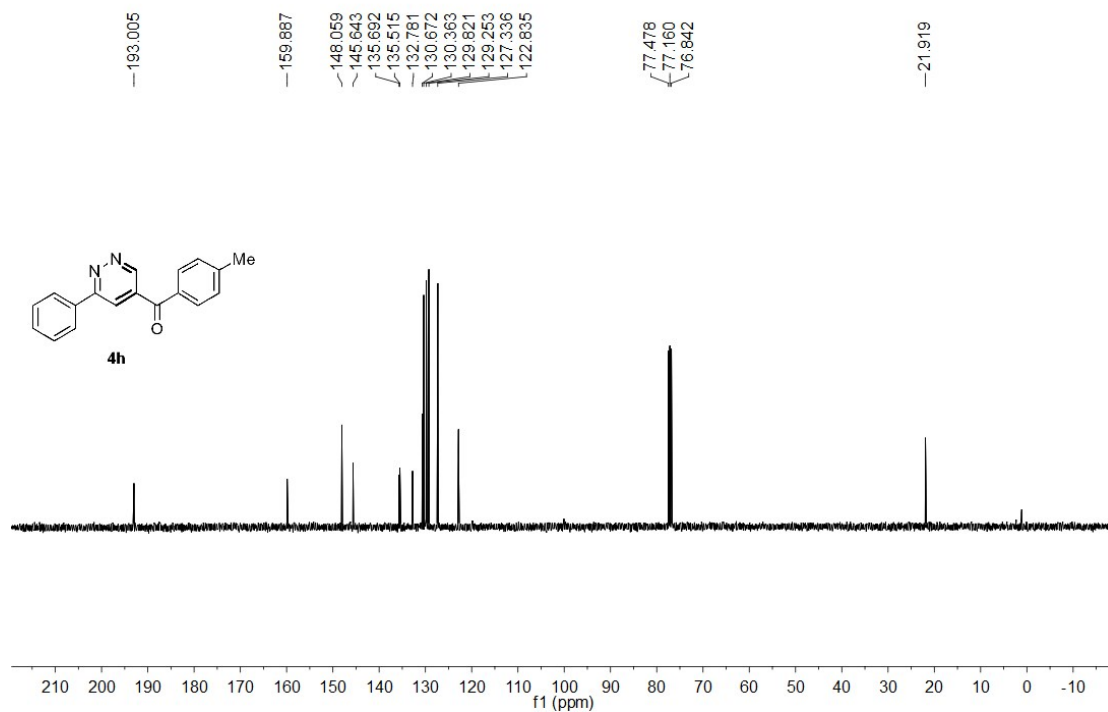

FJJ-0BC-4

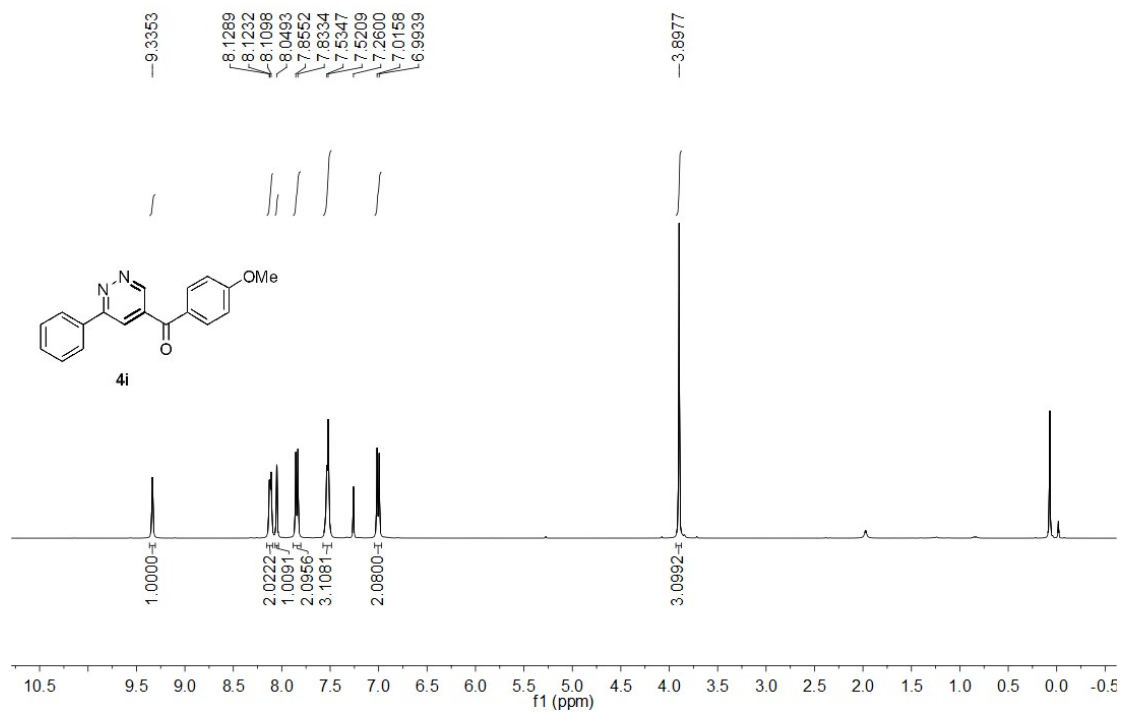

FJJ-0BC-4

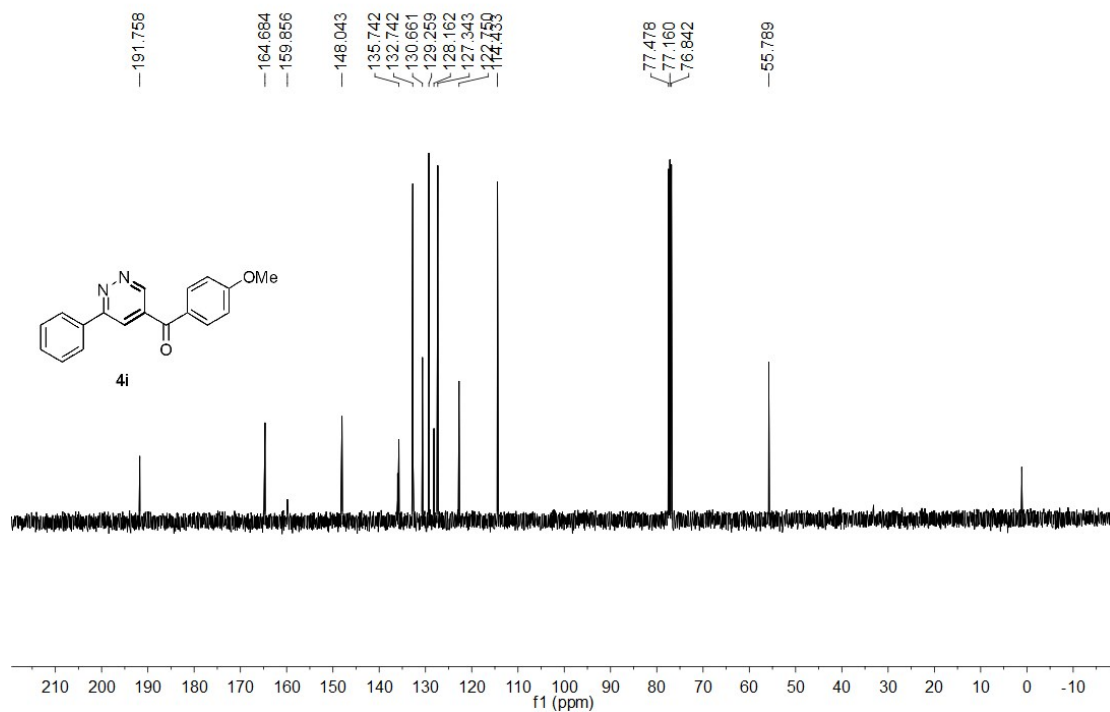

FJJ-R280

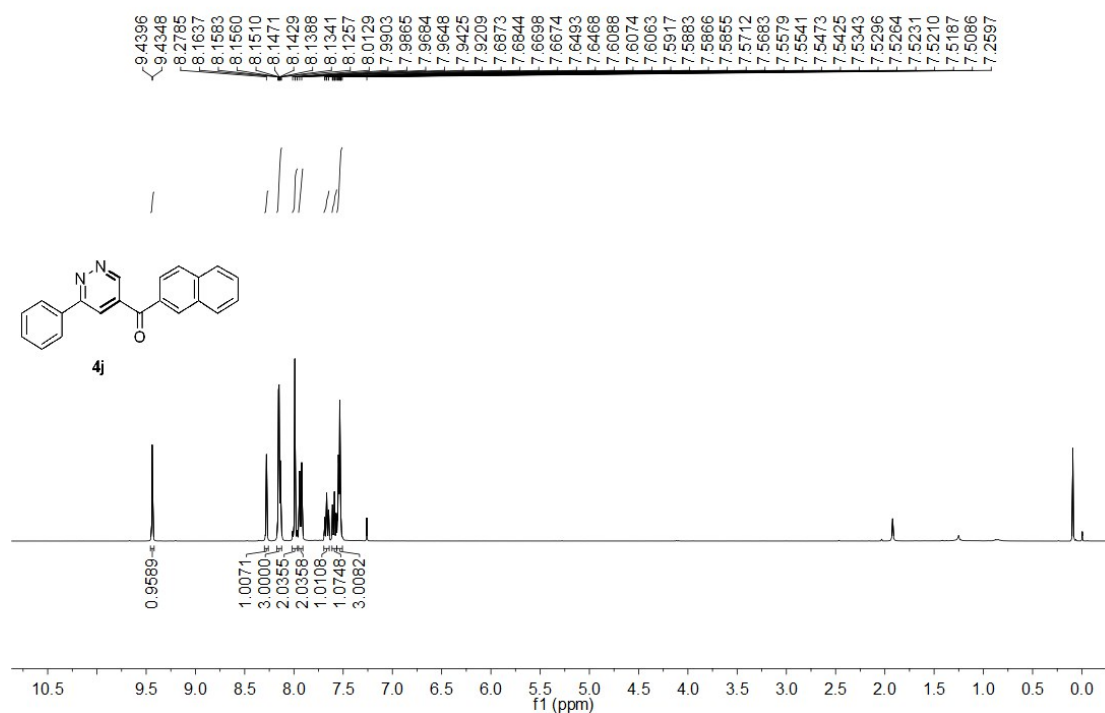

FJJ-R280

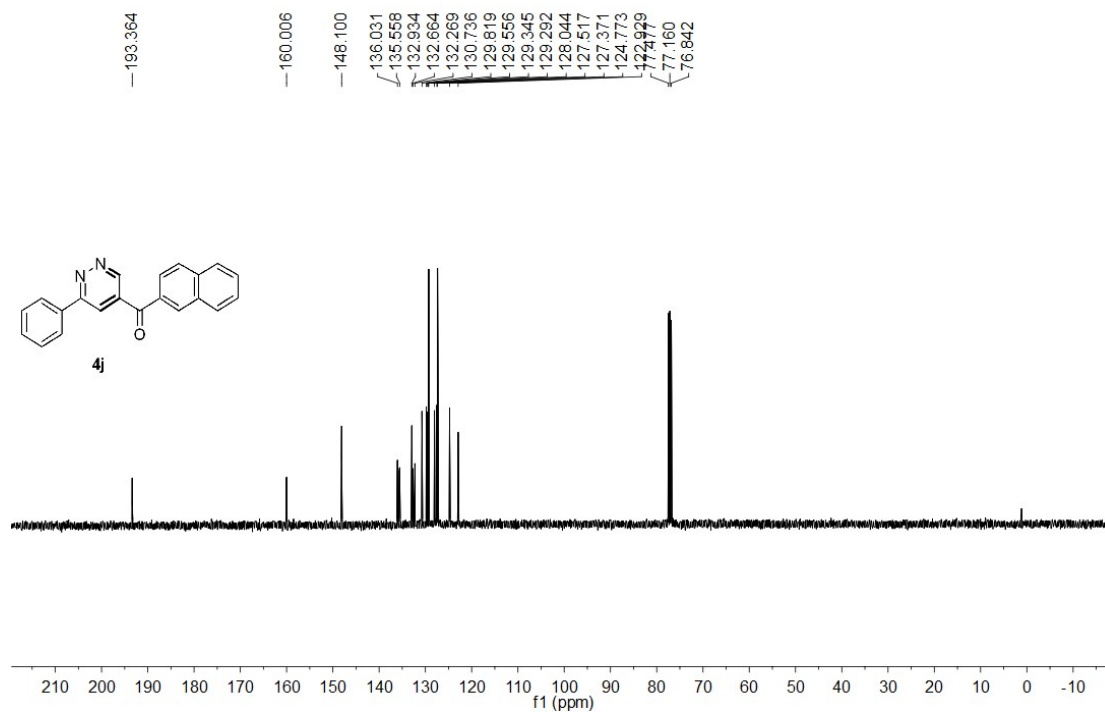

FJJ-R290

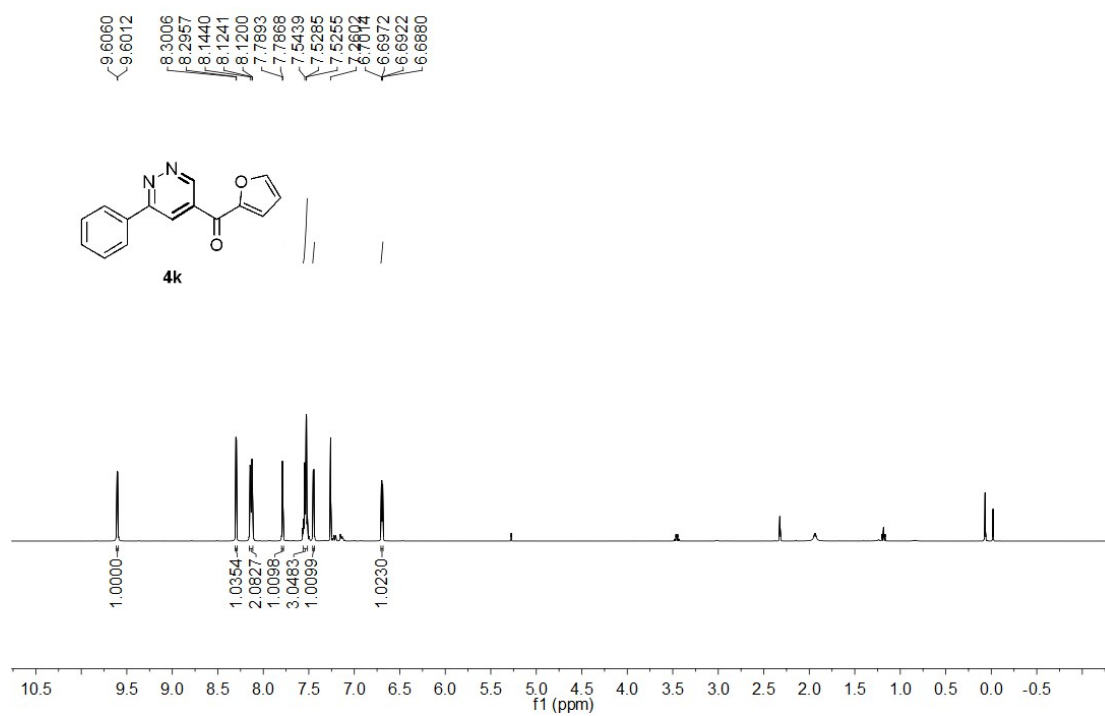

FJJ-R290

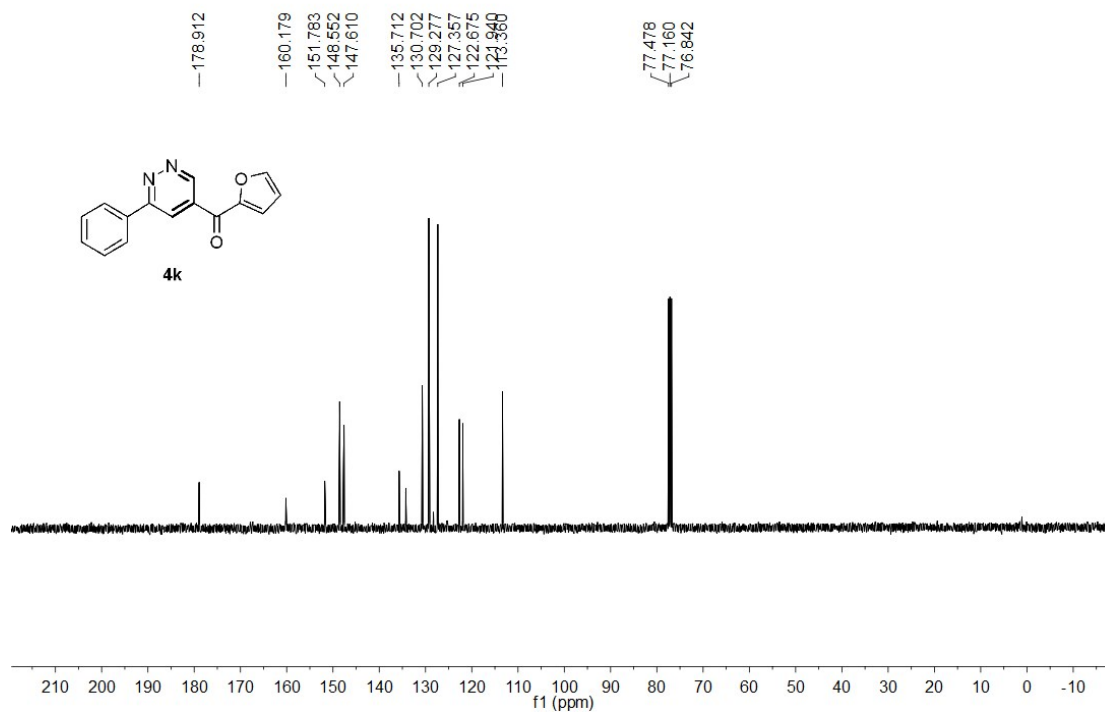

FJJ-R285

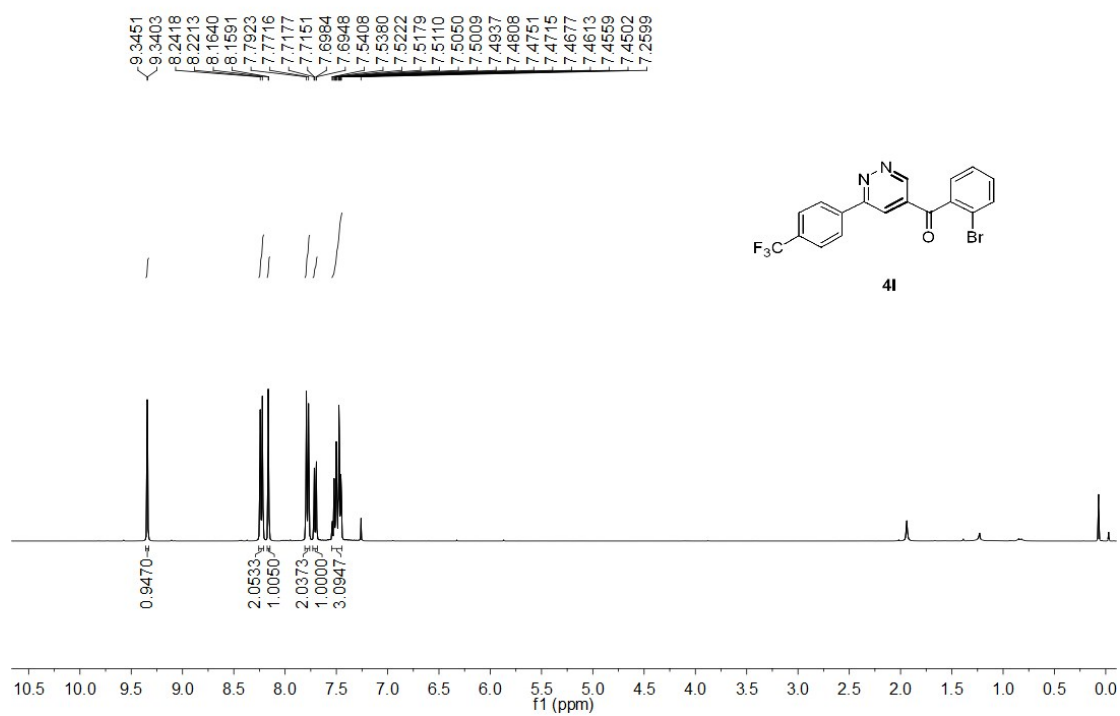

FJJ-R285-CF3

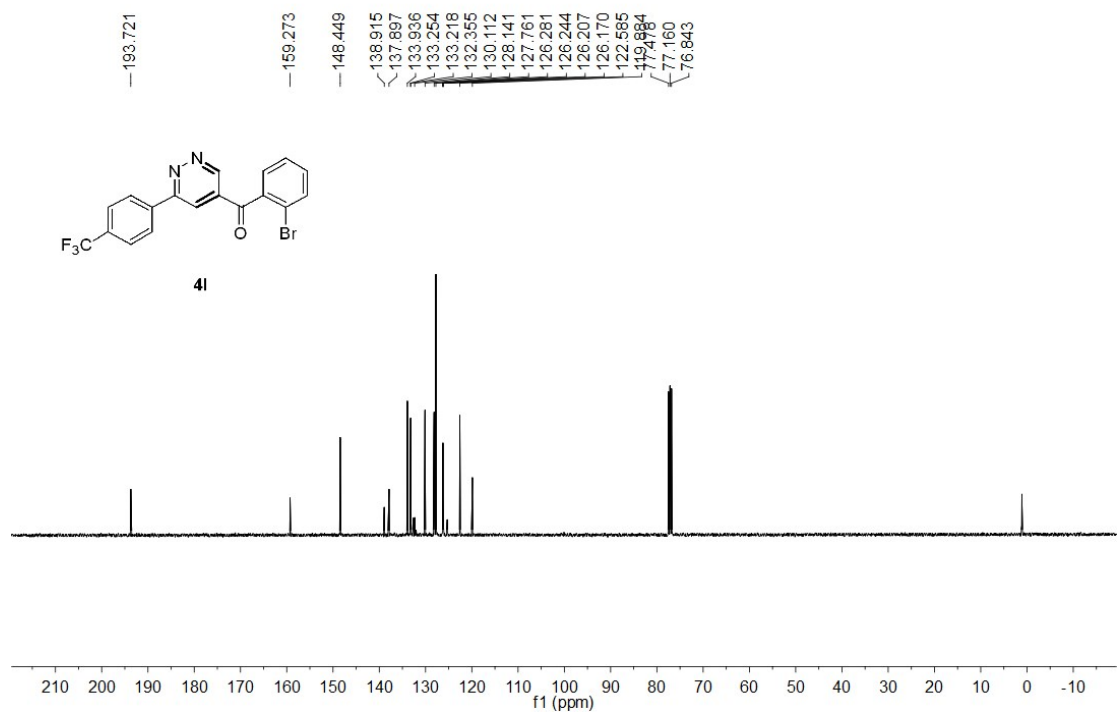

FJJ-N0-1

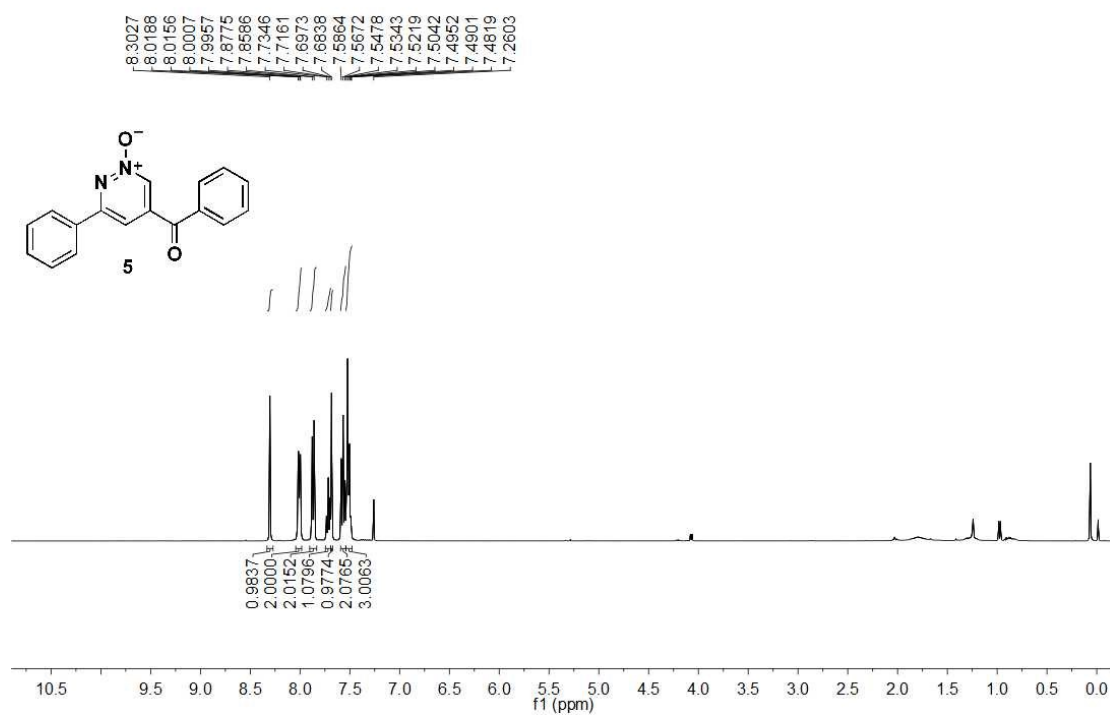

FJJ-N0-1

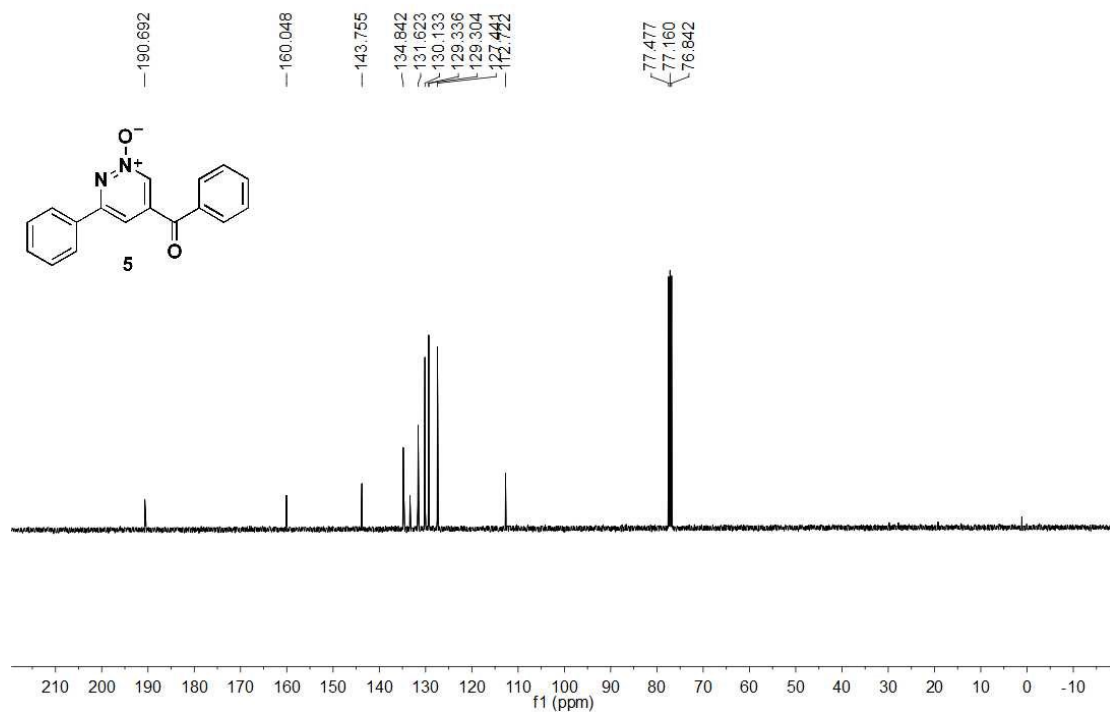

Supplement: d0ob01958e1.pdf [file d0ob01958e1.pdf]
